# Supplementary material
Source: publisher site journal article supplement (https://www.dovepress.com/article/404066)
Supplement: Supplementary file 1 [file get_supplementary_file.php]

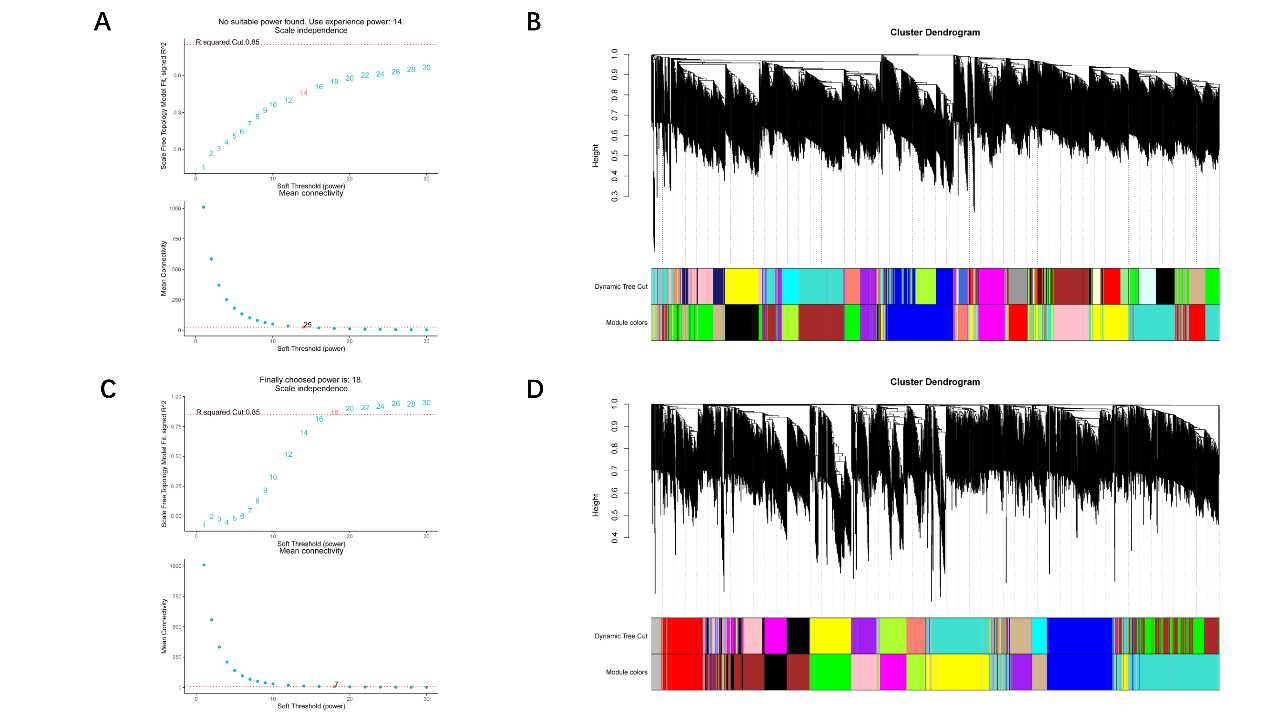


**SUPPLEMENT FIGURE 1** ǀ Weighted gene co-expression network analysis (WGCNA). (A) Soft-threshold power of GSE60993. (B) Cluster dendrogram of co-expression genes in GSE60993. (C) Soft-threshold power of GSE81622. (D) Cluster dendrogram of co-expression genes in GSE81622.


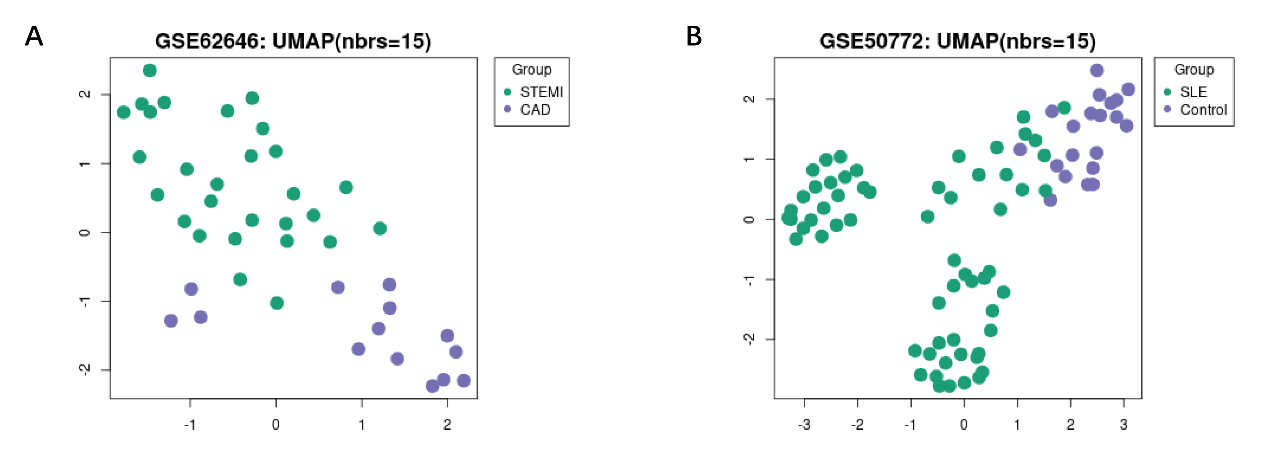


**SUPPLEMENT FIGURE 2** ǀ The UMAP diagram. (A) The UMAP diagram of GSE62646 shows the variation between different samples. Each point represents a sample and the distance between samples represents the variation between samples. (B) The UMAP diagram of GSE50772.

| Statins = 1 (%) | 15 (75.0) | 7 (70.0) | 8 (80.0) | 1 |  |
| --- | --- | --- | --- | --- | --- |

**Supplementary Table 1 |** Baseline clinical characteristics of the patients

|  | Overall | Control | AMI | p | test |
| --- | --- | --- | --- | --- | --- |
| N | 20 | 10 | 10 |  |  |
| Age (mean (SD)) | 65.35 (10.40) | 70.00 (3.98) | 60.70 (10.37) | 0.042 |  |
| Men = 1 (%) | 14 (70.0) | 5 (50.0) | 9 (90.0) | 0.143 |  |
| BMI (kg/m2) (mean (SD)) | 24.49 (2.73) | 24.33 (2.00) | 24.64 (3.42) | 0.807 |  |
| Hypertension = 1 (%) | 14 (70.0) | 7 (70.0) | 7 (70.0) | 1 |  |
| Diabetes = 1 (%) | 5 (25.0) | 2 (20.0) | 3 (30.0) | 1 |  |
| Blood glucose (median [IQR]) | 5.70 [4.72, 6.46] | 4.68 [4.59, 5.24] | 6.52 [5.99, 10.86] | 0.001 | nonnorm |
| HbA1c (median [IQR]) | 5.90 [5.57, 6.48] | 5.80 [5.55, 6.40] | 6.00 [5.67, 6.75] | 0.596 | nonnorm |
| Smoking = 1 (%) | 9 (45.0) | 2 (20.0) | 7 (70.0) | 0.072 |  |
| LDL.C (mean (SD)) | 3.11 (0.87) | 2.74 (0.87) | 3.47 (0.73) | 0.058 |  |
| Uric.acid (mean (SD)) | 374.80 (90.58) | 343.80 (107.23) | 405.80 (60.72) | 0.129 |  |
| BNP (median [IQR]) | 226.25 [117.00, 716.72] | 115.00 [75.75, 312.50] | 331.80 [213.28, 719.38] | 0.07 | nonnorm |
| hsCRP (median [IQR]) | 2.00 [0.16, 4.31] | 0.11 [0.00, 2.00] | 3.38 [1.95, 7.45] | 0.015 | nonnorm |
| HB (mean (SD)) | 139.05 (18.94) | 129.50 (12.88) | 148.60 (19.72) | 0.019 |  |
| ACEI.ARB = 1 (%) | 13 (65.0) | 5 (50.0) | 8 (80.0) | 0.348 |  |
| Statins = 1 (%) | 15 (75.0) | 7 (70.0) | 8 (80.0) | 1 |  |

**Supplementary Table 2 |** Differentially expressed genes

| Gene | AMI | Control | log2FoldChange | P Value |
| --- | --- | --- | --- | --- |
| HCP5 | 1.26 | 5.12 | -3.86 | 7.18E-07 |
| SAP30 | 3.72 | 1.2 | 2.52 | 5.89E-07 |
| CLEC4E | 6.14 | 3.92 | 2.22 | 2.99E-06 |
| CHCHD4P3 | -2.12 | 1.46 | -3.58 | 2.84E-06 |
| RP11-554I8.1 | -0.44 | 2.33 | -2.77 | 2.33E-06 |
| WI2-87327B8.2 | 3.14 | 0.1 | 3.04 | 2.27E-06 |
| MMP9 | 7.52 | 4.19 | 3.33 | 2.23E-06 |
| PFKFB2 | 3.86 | 0.79 | 3.07 | 4.35E-06 |
| XXyac-YR38GF2.1 | 0.81 | -3.98 | 4.79 | 5.86E-06 |
| PADI4 | 7.08 | 4.61 | 2.48 | 9.76E-06 |
| RP11-798M19.3 | 3.79 | 1.22 | 2.57 | 1.15E-05 |
| PADI2 | 5.34 | 3.18 | 2.15 | 1.35E-05 |
| ECHDC3 | 2.29 | -0.92 | 3.22 | 1.48E-05 |
| IGHV1-3 | 1.17 | 3.45 | -2.27 | 0.000019 |
| RP11-254F19.2 | 2.78 | 0.12 | 2.66 | 0.000018 |
| PCNP | 1.56 | 3.49 | -1.93 | 2.46E-05 |
| ALOX5AP | 7.08 | 5.07 | 2.01 | 2.32E-05 |
| RP11-379K17.9 | 2.31 | -0.13 | 2.44 | 2.61E-05 |
| ARG1 | 4.03 | 0.31 | 3.72 | 2.92E-05 |
| TMEM229B | -0.32 | 2.05 | -2.37 | 3.19E-05 |
| CLEC4D | 5.61 | 3.05 | 2.56 | 0.00004 |
| AREG | 0.33 | -2.96 | 3.29 | 3.65E-05 |
| ERLIN1 | 3.45 | 1.81 | 1.64 | 3.83E-05 |
| RP6-159A1.4 | 8.45 | 6.74 | 1.72 | 0.000047 |
| CYP4F3 | 5.58 | 3.85 | 1.73 | 4.96E-05 |
| RP11-291B21.2 | 1.05 | 3.38 | -2.33 | 0.000054 |
| LINC00937 | 2.76 | 0.84 | 1.93 | 6.11E-05 |
| SLED1 | 5.13 | 2.94 | 2.19 | 6.25E-05 |
| TRBV6-5 | -0.59 | 2.86 | -3.45 | 5.88E-05 |
| KIAA1147 | 1.93 | 3.8 | -1.87 | 5.71E-05 |
| VNN3 | 5.55 | 3.8 | 1.75 | 6.49E-05 |
| IL1R2 | 6.07 | 3.33 | 2.73 | 7.36E-05 |
| GRAP2 | 3.02 | 4.35 | -1.33 | 7.21E-05 |
| RPSAP22 | 1.68 | -0.95 | 2.63 | 7.43E-05 |
| IRS2 | 5.4 | 3.16 | 2.24 | 7.25E-05 |
| BMX | 3.08 | 0.44 | 2.64 | 8.02E-05 |
| FKBP5 | 6.08 | 3.91 | 2.17 | 8.58E-05 |
| LINC00694 | 4.97 | 2.84 | 2.14 | 7.99E-05 |
| ZNF551 | 0.89 | -1.33 | 2.22 | 8.47E-05 |
| TMIGD3 | 1.06 | -2.61 | 3.67 | 8.23E-05 |
| IL18R1 | 4.57 | 2.29 | 2.28 | 0.000109 |
| PER1 | 2.38 | 0.41 | 1.97 | 0.000116 |
| DUSP1 | 7.98 | 6.21 | 1.77 | 0.000105 |
| CD8B | 1.35 | 3.32 | -1.97 | 9.23E-05 |
| RP11-561P12.5 | 5.94 | 3.8 | 2.14 | 0.000117 |
| CTSG | 0.95 | -2.18 | 3.13 | 0.000119 |
| HEMGN | 3.85 | 5.98 | -2.13 | 0.000102 |
| ALG1L13P | 4.48 | 2.75 | 1.73 | 0.000113 |
| TRAV12-2 | 1.2 | 3.28 | -2.07 | 0.000102 |
| S100A12 | 7.99 | 5.54 | 2.45 | 9.48E-05 |
| QPCT | 5.18 | 3.73 | 1.45 | 0.000108 |
| LINC00649 | -0.09 | 2.06 | -2.15 | 9.42E-05 |
| RN7SL587P | 3.47 | 1.68 | 1.79 | 9.63E-05 |
| CD27 | 2.92 | 4.51 | -1.59 | 0.000116 |
| TLR4 | 6.53 | 5.17 | 1.36 | 0.000114 |
| RP11-77O7.1 | 1.54 | 3.14 | -1.6 | 0.000125 |
| APOBEC3C | 3.92 | 5.11 | -1.19 | 0.000148 |
| CA4 | 3.82 | 1.48 | 2.34 | 0.000156 |
| CMTM2 | 5.13 | 3.42 | 1.71 | 0.000157 |
| SAMSN1 | 4.84 | 2.87 | 1.97 | 0.000146 |
| TRAV21 | 0.5 | 2.77 | -2.27 | 0.000156 |
| GZMM | 1.6 | 3.25 | -1.65 | 0.00015 |
| VPREB3 | 0.19 | 2.09 | -1.9 | 0.000156 |
| CD8A | 2.72 | 4.38 | -1.66 | 0.000146 |
| ZNF281 | 3.99 | 2.74 | 1.25 | 0.000162 |
| RGCC | 2.67 | 4.19 | -1.51 | 0.00019 |
| AC004987.9 | 1.65 | 3 | -1.35 | 0.000177 |
| KIF27 | 4.19 | 2.76 | 1.44 | 0.000184 |
| F5 | 4.5 | 2.88 | 1.62 | 0.000196 |
| RP11-256L6.3 | 5.78 | 4.32 | 1.46 | 0.000204 |
| VNN2 | 6.85 | 5.6 | 1.25 | 0.000184 |
| PLBD1-AS1 | 2.87 | 1.15 | 1.72 | 0.000202 |
| RP5-906C1.1 | 6.52 | 5.04 | 1.48 | 0.000173 |
| PGLYRP1 | 5.76 | 3.25 | 2.51 | 0.000175 |
| GRAP | 1.08 | 2.58 | -1.5 | 0.0002 |
| RP11-443B7.1 | 2.66 | 1.23 | 1.43 | 0.000204 |
| CCDC122 | -3.35 | -0.5 | -2.85 | 0.000192 |
| PNPLA1 | 1.83 | 0.06 | 1.77 | 0.000184 |
| RP11-166N6.2 | 1.19 | -1.66 | 2.85 | 0.000182 |
| IGHV5-51 | 1.45 | 3.09 | -1.64 | 0.000198 |
| RP11-154H23.3 | 3.95 | 2.73 | 1.22 | 0.000207 |
| HAL | 4.8 | 3.35 | 1.45 | 0.000209 |
| ODC1 | 3.31 | 4.51 | -1.2 | 0.000216 |
| DAPK2 | 3.33 | 1.91 | 1.42 | 0.000227 |
| TRAV13-1 | 1.97 | 3.91 | -1.94 | 0.000226 |
| SLC37A3 | 2.26 | 0.54 | 1.72 | 0.000223 |
| RP11-76E17.4 | 3.03 | -0.02 | 3.06 | 0.000226 |
| NTNG2 | 4.43 | 2.8 | 1.63 | 0.000233 |
| LINC00211 | 3.47 | 1.45 | 2.02 | 0.000236 |
| CNR2 | 0.91 | 2.44 | -1.53 | 0.000241 |
| NLRC4 | 4.25 | 2.99 | 1.25 | 0.000259 |
| RGL4 | 2.1 | 0.06 | 2.04 | 0.000252 |
| RN7SKP16 | 6.84 | 4.95 | 1.9 | 0.00025 |
| ADAM19 | 5.82 | 4.64 | 1.18 | 0.00026 |
| KCNE1 | 2.24 | -0.6 | 2.85 | 0.000254 |
| USP12 | 3.05 | 4.2 | -1.15 | 0.000256 |
| LTB4R | 4.3 | 3.1 | 1.19 | 0.000245 |
| CKAP4 | 5.32 | 3.86 | 1.47 | 0.000263 |
| PXK | 3.59 | 2.4 | 1.18 | 0.000308 |
| MCEMP1 | 3.39 | 1.02 | 2.38 | 0.000308 |
| TRBC2 | 5.79 | 7.35 | -1.56 | 0.000315 |
| FAM49A | 5.4 | 3.88 | 1.52 | 0.000289 |
| BST1 | 5.01 | 3.8 | 1.2 | 0.000315 |
| RP11-219E7.1 | 4 | 2.53 | 1.47 | 0.000311 |
| SDCBPP3 | 2.74 | 1.36 | 1.38 | 0.000302 |
| SIRPG | 1.07 | 2.93 | -1.85 | 0.00028 |
| PRDX2 | 1.82 | 3.28 | -1.47 | 0.000313 |
| RP11-701H24.7 | 2.01 | 3.72 | -1.71 | 0.0003 |
| MME | 6.21 | 4.98 | 1.23 | 0.000277 |
| CXCL5 | 0.86 | 3.01 | -2.15 | 0.000306 |
| CSGALNACT2 | 6 | 4.91 | 1.09 | 0.000304 |
| RBP7 | 4.05 | 2.38 | 1.67 | 0.000312 |
| FGD4 | 3.81 | 1.69 | 2.12 | 0.0003 |
| RP11-351I24.1 | 1.51 | -0.38 | 1.89 | 0.000303 |
| FCAR | 4.65 | 2.8 | 1.85 | 0.000321 |
| IL1R1 | 2.58 | 0.73 | 1.85 | 0.000332 |
| MOB1B | 1.63 | 3.1 | -1.46 | 0.000328 |
| RP11-59D5__B.2 | 3.06 | 1.44 | 1.62 | 0.000333 |
| SBK1 | 1 | 2.66 | -1.66 | 0.000331 |
| UBASH3A | 0.84 | 2.49 | -1.65 | 0.000345 |
| IRAK3 | 5.94 | 4.24 | 1.7 | 0.000345 |
| SLCO4C1 | 4.22 | 2.95 | 1.27 | 0.000351 |
| TRAV4 | 0.26 | 3.12 | -2.86 | 0.000357 |
| XK | 1.35 | 2.95 | -1.6 | 0.000369 |
| LDLRAP1 | 1.39 | 3.23 | -1.85 | 0.000388 |
| HSPB1 | -0.02 | 1.8 | -1.83 | 0.000371 |
| RP11-235E17.4 | -1.25 | 1.32 | -2.56 | 0.000388 |
| NAMPTP1 | 8.89 | 7.3 | 1.59 | 0.000372 |
| GABARAPL1 | 2.74 | 1.15 | 1.59 | 0.000388 |
| PLBD1 | 6.86 | 5.32 | 1.54 | 0.000387 |
| MTND5P32 | 5.16 | 3.68 | 1.48 | 0.000378 |
| ANTXRLP1 | 0.81 | 2.26 | -1.45 | 0.000374 |
| ZFAS1 | 4.94 | 3.72 | 1.23 | 0.000403 |
| RP11-427L15.2 | 4.54 | 3.49 | 1.05 | 0.000408 |
| BCL11B | 2.77 | 4.23 | -1.46 | 0.000409 |
| SCARNA10 | 8.61 | 6.34 | 2.27 | 0.000409 |
| NFIL3 | 5.77 | 4.69 | 1.09 | 0.000415 |
| GRAPL | 0.26 | 2.01 | -1.75 | 0.000424 |
| IL2RB | 3.01 | 4.54 | -1.53 | 0.000428 |
| CD3E | 3.38 | 4.89 | -1.51 | 0.000431 |
| ENDOD1 | 2.08 | 3.29 | -1.22 | 0.000437 |
| APMAP | 6.82 | 5.63 | 1.19 | 0.000452 |
| CEACAM4 | 6.55 | 4.83 | 1.72 | 0.000451 |
| SLA | 5.77 | 4.6 | 1.18 | 0.000452 |
| LINC01352 | 1.15 | -0.9 | 2.05 | 0.000455 |
| CTD-2256P15.2 | -3.26 | -0.7 | -2.56 | 0.000455 |
| MBNL3 | 2.27 | 3.95 | -1.68 | 0.000446 |
| SLC1A5 | 1.92 | 3.55 | -1.63 | 0.000458 |
| PDLIM1 | 1.63 | 3.28 | -1.65 | 0.000473 |
| HMGB2 | 4.01 | 2.11 | 1.9 | 0.000466 |
| EHD3 | 1.17 | 2.39 | -1.22 | 0.000475 |
| TP53I11 | 2.48 | 1.15 | 1.32 | 0.000473 |
| RP11-153M7.5 | 2.97 | 1.33 | 1.64 | 0.000478 |
| LIPN | 4 | 2.15 | 1.85 | 0.000473 |
| SSBP3 | 1.41 | 2.7 | -1.29 | 0.000484 |
| ID3 | -0.19 | 1.84 | -2.03 | 0.000492 |
| RP11-252K23.2 | 0.5 | 2.01 | -1.51 | 0.00051 |
| TJP3 | -2.85 | -0.5 | -2.35 | 0.000536 |
| BANF1 | 0 | 1.63 | -1.63 | 0.000537 |
| MANSC1 | 3.28 | 1.52 | 1.76 | 0.000543 |
| MTCO2P33 | 2.6 | 0.74 | 1.86 | 0.000553 |
| ZNF792 | 1.07 | 2.33 | -1.26 | 0.000569 |
| MAL | 1.54 | 2.68 | -1.14 | 0.00066 |
| Telomerase-vert | 3.8 | 5.09 | -1.3 | 0.000665 |
| MTCYBP23 | 5.45 | 4.01 | 1.44 | 0.000663 |
| RP11-12D24.6 | -1.18 | 0.6 | -1.78 | 0.000639 |
| RP11-267M23.4 | -2.03 | 0.1 | -2.13 | 0.000661 |
| TRAV8-2 | -0.33 | 2.3 | -2.63 | 0.000573 |
| SRPK1 | 4.05 | 2.87 | 1.18 | 0.000616 |
| ICOS | 1.38 | 2.93 | -1.55 | 0.00061 |
| TRAC | 4.73 | 6.49 | -1.76 | 0.000635 |
| LCK | 2.47 | 3.86 | -1.39 | 0.000566 |
| RPL23AP65 | -0.78 | 1.12 | -1.91 | 0.000662 |
| DNTTIP1 | 4.48 | 3.39 | 1.09 | 0.000654 |
| SFXN5 | 1.77 | 0.44 | 1.33 | 0.000572 |
| WHAMMP3 | -1.04 | 0.66 | -1.7 | 0.000646 |
| P2RY11 | -0.49 | 1.34 | -1.83 | 0.000577 |
| RP11-25K21.6 | 4.07 | 2.57 | 1.5 | 0.000667 |
| RP11-546D6.3 | 1.1 | 2.31 | -1.21 | 0.000652 |
| IL21R | 0.55 | 2.02 | -1.47 | 0.000652 |
| PHACTR1 | 1.72 | -0.03 | 1.75 | 0.000628 |
| CDA | 5.97 | 4.39 | 1.58 | 0.000587 |
| SIGLEC5 | 4.82 | 3.65 | 1.17 | 0.000658 |
| TSC22D1 | 0.91 | 2.37 | -1.46 | 0.000605 |
| OLFM2 | -1.78 | 0.26 | -2.04 | 0.000605 |
| FAM101B | 6.41 | 5.1 | 1.31 | 0.000662 |
| RP11-1250I15.1 | 0.47 | 2.21 | -1.73 | 0.000639 |
| CX3CR1 | 3.71 | 5.16 | -1.44 | 0.000655 |
| RAB27B | 1.93 | 3.41 | -1.47 | 0.000623 |
| MEGF9 | 7.82 | 6.61 | 1.21 | 0.000634 |
| MXD1 | 4.72 | 3.58 | 1.13 | 0.000564 |
| CATIP-AS1 | 1.84 | -0.34 | 2.17 | 0.000653 |
| HLA-DOA | 0.85 | 2.45 | -1.6 | 0.000602 |
| CRISP3 | 2.36 | -1.26 | 3.62 | 0.000675 |
| TRBV4-1 | 0.25 | 2.39 | -2.14 | 0.000678 |
| KLHL2 | 3.77 | 2.59 | 1.18 | 0.00069 |
| CD180 | 1.73 | 2.9 | -1.17 | 0.000691 |
| IGKV3-15 | 2.18 | 3.66 | -1.48 | 0.000828 |
| GTF2IP12 | 2.64 | 1.36 | 1.28 | 0.00073 |
| IFIT1B | 2.37 | 3.96 | -1.59 | 0.000805 |
| RP11-288H12.3 | 4.89 | 3.91 | 0.98 | 0.000773 |
| AC058791.1 | 4.81 | 3.62 | 1.19 | 0.000722 |
| RAB2B | 2.9 | 4.34 | -1.43 | 0.000725 |
| RPL7AP66 | 3.29 | 4.37 | -1.08 | 0.000781 |
| NOG | -0.38 | 1.92 | -2.3 | 0.000797 |
| GK | 4.42 | 3.24 | 1.18 | 0.000801 |
| RPS6P25 | 0.34 | 1.86 | -1.52 | 0.000823 |
| SCRN1 | 0.09 | 1.51 | -1.42 | 0.00081 |
| NAMPT | 8.21 | 6.9 | 1.31 | 0.000755 |
| IGHV2-5 | 0.85 | 2.57 | -1.72 | 0.000699 |
| RP4-568C11.4 | 2.51 | -0.3 | 2.81 | 0.000806 |
| RP11-67L2.2 | 4.02 | 2.98 | 1.03 | 0.000808 |
| EEF1G | 4.55 | 5.64 | -1.09 | 0.00071 |
| KL | -0.51 | -2.79 | 2.28 | 0.000828 |
| SH3BGRL2 | 2.56 | 4.49 | -1.93 | 0.000728 |
| S1PR1 | 3.89 | 5.26 | -1.36 | 0.000755 |
| CD248 | -2.39 | 0.89 | -3.28 | 0.000761 |
| GAPT | 3.85 | 2.56 | 1.29 | 0.000828 |
| CDKN1A | 0.19 | 1.8 | -1.6 | 0.000799 |
| PYGL | 6.65 | 5.1 | 1.55 | 0.000783 |
| LTK | -1.76 | 0.67 | -2.43 | 0.000828 |
| RP11-443B7.3 | 3.68 | 1.76 | 1.91 | 0.000752 |
| RP3-508I15.21 | 4.21 | 2.88 | 1.34 | 0.000821 |
| RAB19 | 2.1 | 0.05 | 2.05 | 0.000713 |
| CAMKK1 | 2.79 | 1.34 | 1.45 | 0.00075 |
| RP11-367G6.3 | 2.04 | 3.4 | -1.36 | 0.000763 |
| TRBV19 | 1.81 | 3.62 | -1.81 | 0.000761 |
| ZNF445 | 3.51 | 2.32 | 1.19 | 0.000703 |
| RP11-128N14.5 | 0.86 | 2.12 | -1.26 | 0.000713 |
| LINC01272 | 5.03 | 3.54 | 1.49 | 0.000753 |
| HK3 | 5.34 | 4.23 | 1.12 | 0.000764 |
| MTERF2 | 0.37 | -2.11 | 2.48 | 0.000767 |
| RP11-1C8.6 | -0.02 | 1.67 | -1.69 | 0.000776 |
| CXCR3 | -1.15 | 1.04 | -2.19 | 0.000803 |
| AC107982.4 | 0.7 | -1.09 | 1.79 | 0.000746 |
| DAAM2 | 0.56 | -3.04 | 3.59 | 0.000837 |
| RP11-76E17.3 | 3.27 | 0.47 | 2.8 | 0.00084 |
| CLUHP3 | -0.08 | 1.97 | -2.05 | 0.000833 |
| NLRP12 | 5.24 | 4.12 | 1.12 | 0.000848 |
| PHC2 | 6.02 | 4.49 | 1.53 | 0.000849 |
| GTPBP6 | 1.65 | 2.86 | -1.22 | 0.000862 |
| RAB6B | -3.3 | -0.86 | -2.44 | 0.000857 |
| UBQLN4 | 1.29 | 2.64 | -1.35 | 0.00086 |
| ST13P6 | 0.56 | 2 | -1.44 | 0.000876 |
| CCR12P | -0.69 | 1.29 | -1.98 | 0.000872 |
| ADORA3 | 0.73 | -1.48 | 2.22 | 0.00087 |
| TLR2 | 7.47 | 6.32 | 1.15 | 0.000879 |
| YPEL5 | 4.27 | 3.11 | 1.16 | 0.000877 |
| ZXDB | 0.38 | 1.71 | -1.33 | 0.000903 |
| FADD | 4.67 | 3.73 | 0.94 | 0.000899 |
| ZNF438 | 2.8 | 1.59 | 1.21 | 0.000905 |
| CPD | 5.51 | 4.5 | 1.01 | 0.000903 |
| GAB2 | 6.04 | 5.03 | 1.01 | 0.000914 |
| BCL9L | 2.21 | 3.47 | -1.26 | 0.000923 |
| LAT | 0.66 | 2.03 | -1.37 | 0.000928 |
| AC017116.11 | 2.43 | 0.9 | 1.53 | 0.000945 |
| GPR141 | 3.84 | 2.73 | 1.11 | 0.000949 |
| TXN | 4.78 | 3.42 | 1.36 | 0.000959 |
| CACNA1C-AS2 | -2.16 | 0.35 | -2.51 | 0.000972 |
| LINC00334 | -1.91 | -0.02 | -1.9 | 0.000969 |
| SAMD1 | 1.38 | 2.59 | -1.21 | 0.000979 |
| CXCR5 | 1.07 | 2.42 | -1.34 | 0.000983 |
| NPL | 4.62 | 3.53 | 1.09 | 0.00099 |
| TECRP1 | 0.96 | 2.61 | -1.65 | 0.000996 |
| ATIC | 0.86 | 2.29 | -1.43 | 0.001008 |
| RPF2 | -0.83 | 0.86 | -1.69 | 0.001012 |
| DZIP3 | 0.24 | 1.63 | -1.38 | 0.001007 |
| CSF2RA | 4.23 | 3.17 | 1.06 | 0.001038 |
| MGAM | 6.8 | 5.15 | 1.65 | 0.001042 |
| TMCC3 | 4.88 | 3.74 | 1.14 | 0.001041 |
| IGKV1-8 | -3 | -0.63 | -2.36 | 0.001047 |
| FAXDC2 | 0.83 | 2.77 | -1.94 | 0.001048 |
| DYSF | 6.55 | 5.25 | 1.3 | 0.001109 |
| CAMP | 4.56 | 1.69 | 2.87 | 0.001319 |
| SOS2 | 5.57 | 4.58 | 0.99 | 0.001296 |
| NRROS | 2.38 | 3.56 | -1.19 | 0.001303 |
| CDK5R1 | 3.26 | 1.55 | 1.7 | 0.001205 |
| RPL10 | 3.42 | 4.52 | -1.1 | 0.001176 |
| NBEA | -1.74 | 0.57 | -2.31 | 0.001158 |
| NMT2 | 0.62 | 2.15 | -1.53 | 0.001256 |
| TOMM34 | 0.84 | 2.08 | -1.24 | 0.001168 |
| ATG2A | 4.13 | 3.13 | 1 | 0.00124 |
| RPL35P3 | 0.63 | 2.01 | -1.39 | 0.001278 |
| TMEM92-AS1 | 1.91 | 0.05 | 1.87 | 0.001259 |
| IGLC3 | 2.51 | 3.77 | -1.26 | 0.00121 |
| CCDC50 | 1.13 | 2.49 | -1.36 | 0.001266 |
| ZBTB16 | 3.58 | 1.55 | 2.03 | 0.001195 |
| IGLV1-47 | 0.35 | 2.14 | -1.78 | 0.001283 |
| MTND3P12 | 5.93 | 4.65 | 1.28 | 0.001325 |
| PLD4 | -0.94 | 0.79 | -1.73 | 0.001189 |
| COL6A2 | -0.21 | 1.77 | -1.97 | 0.001145 |
| CMTM5 | -1.45 | 0.51 | -1.95 | 0.001297 |
| RP11-5C23.1 | 1.55 | 2.72 | -1.17 | 0.001247 |
| KIF2A | 3.11 | 4.24 | -1.13 | 0.001213 |
| PNO1 | -0.23 | 1.13 | -1.36 | 0.001211 |
| NR1D1 | 0.08 | 1.61 | -1.53 | 0.001298 |
| NPPA-AS1 | -1.07 | 0.81 | -1.88 | 0.001173 |
| RP11-212D19.5 | -0.96 | 0.67 | -1.63 | 0.001086 |
| SDPR | 4.31 | 5.96 | -1.66 | 0.00115 |
| NELL2 | 0.6 | 2.34 | -1.74 | 0.001203 |
| RPIA | 3.31 | 4.45 | -1.14 | 0.001124 |
| BEST1 | 3.5 | 2.24 | 1.26 | 0.001274 |
| VMA21 | 2.08 | 3.3 | -1.22 | 0.001126 |
| NABP1 | 5.94 | 5.02 | 0.92 | 0.001233 |
| RP4-576H24.4 | 2.59 | 1.26 | 1.33 | 0.001258 |
| CXCL1 | 3.55 | 2.23 | 1.33 | 0.001221 |
| S1PR2 | -1.16 | 0.86 | -2.02 | 0.001132 |
| NAP1L1 | 1.87 | 2.95 | -1.08 | 0.001092 |
| TRAV25 | -0.57 | 1.56 | -2.12 | 0.001095 |
| PDE5A | 0.12 | 1.95 | -1.83 | 0.001299 |
| RP3-508I15.22 | 2.31 | 0.91 | 1.4 | 0.00127 |
| DNM3 | -1.12 | 0.66 | -1.78 | 0.00115 |
| GPAT3 | 3.84 | 2.62 | 1.22 | 0.00113 |
| SNTA1 | -2 | 0.15 | -2.15 | 0.001236 |
| TBC1D31 | 0.79 | 1.99 | -1.2 | 0.001066 |
| HPCAL4 | -0.65 | 1.19 | -1.84 | 0.001204 |
| RRS1 | 1.3 | 2.36 | -1.06 | 0.001315 |
| RRAS | 0.94 | 2.19 | -1.25 | 0.00122 |
| RP11-15N24.4 | -3.66 | -0.81 | -2.85 | 0.001062 |
| ADGRG3 | 5.93 | 4.21 | 1.73 | 0.001192 |
| DOK2 | 2.85 | 3.76 | -0.91 | 0.00116 |
| TRAV5 | 0.45 | 2.66 | -2.22 | 0.001318 |
| LIMS1 | 1.76 | 3.21 | -1.45 | 0.001187 |
| ATF7IP2 | -0.12 | 1.41 | -1.54 | 0.001243 |
| RP5-1024N4.4 | 0.42 | -1.9 | 2.32 | 0.001173 |
| S100A9 | 12.23 | 10.6 | 1.63 | 0.001152 |
| CD55 | 5.04 | 3.67 | 1.37 | 0.001321 |
| YWHAH | 2.18 | 3.65 | -1.46 | 0.001264 |
| SOD1P1 | -0.69 | 0.94 | -1.63 | 0.001135 |
| RPS4X | 5.47 | 6.68 | -1.22 | 0.001136 |
| SYTL3 | 4.82 | 3.71 | 1.11 | 0.001238 |
| CTD-3094K11.1 | 2.4 | 0.36 | 2.04 | 0.001172 |
| HOXB2 | -0.9 | 0.98 | -1.88 | 0.001222 |
| GUSBP9 | -0.33 | 1.22 | -1.55 | 0.001296 |
| LINC01128 | -1.28 | 0.89 | -2.17 | 0.001274 |
| RP11-235E17.3 | -2.57 | -0.21 | -2.36 | 0.00119 |
| SIRPB2 | 4.94 | 3.88 | 1.06 | 0.001278 |
| RPS28P7 | 7.76 | 8.98 | -1.22 | 0.001147 |
| CD226 | 2.11 | 3.49 | -1.38 | 0.001146 |
| LFNG | 3.23 | 4.15 | -0.92 | 0.001279 |
| GLTSCR2 | 3.31 | 4.24 | -0.94 | 0.001324 |
| PTP4A2P2 | 0.32 | 1.91 | -1.59 | 0.001315 |
| PITPNM2 | -0.04 | 1.37 | -1.41 | 0.001097 |
| DOC2GP | -3.89 | -1.01 | -2.89 | 0.001332 |
| AC083949.1 | -2.68 | -0.31 | -2.37 | 0.001334 |
| KRT1 | 1.27 | 2.75 | -1.48 | 0.00134 |
| TRBV10-3 | 1.09 | 2.48 | -1.39 | 0.00138 |
| CD6 | 1.75 | 2.97 | -1.23 | 0.001378 |
| DIRC2 | 4.42 | 3.47 | 0.95 | 0.001369 |
| PNMA1 | 2.18 | 3.24 | -1.07 | 0.001374 |
| RP4-575N6.4 | -0.99 | 1.4 | -2.39 | 0.001385 |
| INF2 | 0.14 | 1.59 | -1.44 | 0.001369 |
| RP11-295G20.2 | 1.13 | -0.36 | 1.49 | 0.001388 |
| TRBV18 | 0.01 | 1.98 | -1.97 | 0.001376 |
| PLAGL2 | 2.98 | 3.9 | -0.92 | 0.001391 |
| CD3G | 2.29 | 3.76 | -1.47 | 0.001381 |
| IL32 | 1.1 | 2.48 | -1.38 | 0.001383 |
| MTCO3P23 | 6.71 | 5.29 | 1.41 | 0.001351 |
| NT5C2 | 5.23 | 4.3 | 0.94 | 0.001379 |
| RP11-588K22.2 | -1.4 | 0.68 | -2.08 | 0.00143 |
| TRBV5-1 | 0.94 | 2.72 | -1.78 | 0.001414 |
| PLEKHA8P1 | -0.83 | 0.68 | -1.51 | 0.001403 |
| APOBEC3D | 1.86 | 3.25 | -1.39 | 0.001436 |
| C14orf169 | 1.89 | 3.12 | -1.23 | 0.001411 |
| PA2G4 | 2.56 | 3.57 | -1.01 | 0.001424 |
| CRISPLD2 | 4.99 | 3.7 | 1.29 | 0.00144 |
| FARSB | 1.52 | 2.65 | -1.13 | 0.00141 |
| TNFRSF10A | 1.66 | 2.8 | -1.14 | 0.001431 |
| SLC26A8 | 1.38 | -0.77 | 2.15 | 0.001434 |
| SNRPN | 1.68 | 2.95 | -1.27 | 0.001417 |
| CLEC5A | 0.78 | -0.87 | 1.65 | 0.001448 |
| DIP2C | -2.32 | -0.01 | -2.31 | 0.001481 |
| STRADB | 4.77 | 6.09 | -1.31 | 0.001513 |
| FAM84B | -0.35 | 1.31 | -1.67 | 0.001526 |
| RP11-488C13.5 | -0.34 | 1.19 | -1.53 | 0.001503 |
| ESYT1 | 2.98 | 4.3 | -1.32 | 0.0015 |
| CISH | 1.24 | 2.37 | -1.13 | 0.001519 |
| MPO | 1.64 | -0.83 | 2.48 | 0.001526 |
| IGKV1D-39 | 1.9 | 3.5 | -1.6 | 0.001509 |
| WNT10A | -3.86 | -1.38 | -2.48 | 0.001516 |
| TRBV20-1 | 2.39 | 4.18 | -1.79 | 0.001548 |
| LBH | 3.31 | 4.45 | -1.14 | 0.001553 |
| TRABD2A | 1.44 | 2.87 | -1.43 | 0.001558 |
| ABCA13 | 0.1 | -2.35 | 2.45 | 0.001572 |
| CTD-2555O16.4 | -2.32 | 0.28 | -2.6 | 0.001576 |
| TPST1 | 3.2 | 1.58 | 1.62 | 0.001585 |
| YBX1 | 4.66 | 5.69 | -1.03 | 0.001595 |
| IGKV1-5 | 2.08 | 3.52 | -1.43 | 0.00159 |
| GJB6 | -0.69 | -4.12 | 3.43 | 0.001598 |
| ABHD5 | 5.41 | 4.19 | 1.22 | 0.001603 |
| FAM102A | 1.65 | 2.95 | -1.29 | 0.001625 |
| DHRS7 | 3.48 | 2.51 | 0.96 | 0.001629 |
| RNF144B | 5.55 | 4.3 | 1.25 | 0.001626 |
| BIN1 | 0.97 | 2.48 | -1.51 | 0.001621 |
| RP11-473M20.9 | 4 | 2.89 | 1.11 | 0.001615 |
| SLC38A5 | 0.9 | 2.46 | -1.56 | 0.001641 |
| AC006547.8 | -1.15 | 0.51 | -1.66 | 0.001638 |
| CCR5 | 0.74 | 2.92 | -2.18 | 0.001657 |
| MGAM2 | 2.38 | 0.85 | 1.53 | 0.00168 |
| HCLS1 | 6.85 | 5.98 | 0.87 | 0.001689 |
| JDP2 | 2.37 | 0.79 | 1.58 | 0.001694 |
| HSP90AB1 | 4.93 | 6.08 | -1.14 | 0.0017 |
| PGD | 6.6 | 5.43 | 1.16 | 0.001718 |
| RP11-151A6.4 | -1.95 | 0.32 | -2.28 | 0.001725 |
| FLT3LG | 0.58 | 1.89 | -1.32 | 0.001725 |
| PLA2G12A | 1.04 | 2.17 | -1.13 | 0.001716 |
| RP11-329A14.1 | 4.31 | 5.53 | -1.22 | 0.00173 |
| URB1 | 0.51 | 1.91 | -1.4 | 0.001738 |
| NR3C2 | -0.46 | 1.22 | -1.68 | 0.001736 |
| DEF8 | 3.41 | 2.31 | 1.1 | 0.001747 |
| MTND5P15 | -0.69 | 0.95 | -1.64 | 0.001767 |
| LOXHD1 | 1.84 | -0.52 | 2.36 | 0.00177 |
| MKNK1 | 3.52 | 2.48 | 1.04 | 0.001774 |
| ANP32B | 4.1 | 5.02 | -0.92 | 0.001746 |
| STRBP | 0.21 | 1.6 | -1.39 | 0.001754 |
| RP11-967K21.1 | -2.35 | -0.2 | -2.15 | 0.00178 |
| NR6A1 | 1.64 | 0.42 | 1.22 | 0.001762 |
| RANP1 | -1.45 | 0.26 | -1.72 | 0.001766 |
| AP000640.10 | 2.64 | 1.35 | 1.29 | 0.001781 |
| CCDC64 | -0.64 | 1.02 | -1.66 | 0.001794 |
| RP11-700J17.2 | -0.94 | 0.87 | -1.81 | 0.001804 |
| IGLV8-61 | 0.78 | 2.95 | -2.16 | 0.001819 |
| CHI3L2 | -1.2 | 0.54 | -1.74 | 0.001806 |
| RRP1B | 1.39 | 2.65 | -1.26 | 0.001819 |
| CHMP2A | 4.91 | 3.93 | 0.98 | 0.001814 |
| MFHAS1 | 1.1 | 2.26 | -1.17 | 0.001804 |
| RP11-44F14.2 | 4.35 | 3.07 | 1.29 | 0.001794 |
| PIK3C2B | 0.34 | 1.66 | -1.32 | 0.001839 |
| ME1 | -2.19 | 0.04 | -2.23 | 0.001839 |
| SIGLEC17P | -1.29 | 0.59 | -1.88 | 0.001848 |
| DUSP7 | 1.74 | 2.89 | -1.15 | 0.001847 |
| FBXW8 | -0.33 | 1.25 | -1.58 | 0.001892 |
| BEX2 | -3.62 | -1.18 | -2.45 | 0.001875 |
| STX3 | 4.78 | 3.88 | 0.91 | 0.001883 |
| ANKRD22 | 2.6 | -0.05 | 2.65 | 0.001866 |
| P2RX7 | -0.39 | 1.06 | -1.45 | 0.001883 |
| RP11-522I20.3 | -2.8 | 0.29 | -3.09 | 0.001883 |
| KCTD7 | 1.28 | -0.09 | 1.37 | 0.001869 |
| AD000684.2 | -1.71 | 0.25 | -1.96 | 0.001889 |
| ACSL1 | 6.73 | 5.21 | 1.52 | 0.001889 |
| KLHDC1 | -0.68 | 0.8 | -1.48 | 0.001995 |
| VN1R108P | -1.31 | 0.79 | -2.1 | 0.001956 |
| OLAH | -0.54 | -3.97 | 3.43 | 0.001985 |
| LBR | 5.78 | 4.88 | 0.9 | 0.001953 |
| FASN | 0.22 | 1.65 | -1.44 | 0.001982 |
| FECH | 2.09 | 3.55 | -1.45 | 0.001922 |
| CD5 | 3.26 | 4.43 | -1.18 | 0.001973 |
| CD58 | 5.12 | 4.17 | 0.96 | 0.001942 |
| FBL | 2.31 | 3.38 | -1.07 | 0.001982 |
| AC067940.1 | 0.97 | 2.26 | -1.3 | 0.00199 |
| FAM210B | 4.71 | 6.08 | -1.38 | 0.001916 |
| SACS | -0.42 | 1.51 | -1.93 | 0.001926 |
| SDR42E1P5 | 0.6 | -1.95 | 2.54 | 0.001999 |
| P2RX1 | 4.32 | 3.28 | 1.04 | 0.001986 |
| PDLIM1P4 | 2.82 | 1.63 | 1.19 | 0.001945 |
| ST13 | 2.6 | 3.88 | -1.28 | 0.002002 |
| STOM | 4.32 | 5.25 | -0.93 | 0.001984 |
| NLRC3 | 2.22 | 3.5 | -1.28 | 0.001987 |
| ANKH | 1.66 | 2.86 | -1.2 | 0.001993 |
| ZNF516 | 4.64 | 3.73 | 0.9 | 0.00193 |
| CCDC180 | -3.65 | -0.9 | -2.75 | 0.001997 |
| PAX5 | 1.25 | 2.61 | -1.36 | 0.002013 |
| MMD | 2.9 | 4.14 | -1.24 | 0.002014 |
| RP11-373D23.2 | 5.62 | 4.58 | 1.04 | 0.00203 |
| GSTM3 | -2.33 | -0.33 | -2 | 0.002023 |
| ZNF552 | 3.3 | 2.33 | 0.97 | 0.00203 |
| IGHV1-18 | 1.87 | 3.12 | -1.25 | 0.002084 |
| MFSD13A | 1.73 | 0.61 | 1.12 | 0.002085 |
| EIF4B | 3.97 | 4.79 | -0.82 | 0.002062 |
| FES | 3.38 | 2.41 | 0.97 | 0.002079 |
| ZFP41 | 0.47 | 1.74 | -1.27 | 0.002066 |
| CARNMT1 | 1.08 | 2.34 | -1.25 | 0.002045 |
| GP9 | 0.48 | 2.93 | -2.45 | 0.002082 |
| RP11-981G7.6 | 1.01 | -0.25 | 1.26 | 0.002079 |
| N4BP3 | -1.38 | 0.51 | -1.88 | 0.002071 |
| HLTF | -0.01 | 1.52 | -1.54 | 0.002038 |
| PDCL3P4 | 0.43 | 1.81 | -1.37 | 0.002085 |
| RP11-429G19.3 | 4.44 | 3.3 | 1.15 | 0.002054 |
| PRAM1 | 4.62 | 3.68 | 0.93 | 0.0021 |
| LY9 | 0.78 | 2.14 | -1.37 | 0.002114 |
| CTB-61M7.2 | 5.61 | 4.17 | 1.45 | 0.002123 |
| KCNA3 | 3.27 | 4.62 | -1.35 | 0.002129 |
| URB2 | 0.04 | 1.4 | -1.36 | 0.002141 |
| IGHV3-33 | 0.17 | 1.82 | -1.66 | 0.002148 |
| CXCR4 | 6.47 | 5.53 | 0.94 | 0.002155 |
| NFATC2 | 2.39 | 3.59 | -1.19 | 0.002235 |
| MAP2K6 | 2.6 | 1.27 | 1.32 | 0.002275 |
| PELI1 | 6.72 | 5.79 | 0.93 | 0.002216 |
| ZNF548 | -1.34 | 0.85 | -2.2 | 0.002317 |
| PLXNA1 | -1.6 | 0.02 | -1.62 | 0.002327 |
| MMACHC | -2.05 | -0.19 | -1.86 | 0.002326 |
| RP5-1153D9.5 | 1.89 | 0.65 | 1.24 | 0.002322 |
| SLC45A3 | -0.75 | 1.41 | -2.16 | 0.002263 |
| SLC41A1 | -0.24 | 1.19 | -1.43 | 0.002315 |
| CTA-292E10.8 | -0.14 | 1.54 | -1.68 | 0.002254 |
| ACSL6 | -1.29 | 0.33 | -1.62 | 0.002237 |
| RP11-44F14.10 | 3.99 | 3.05 | 0.94 | 0.002196 |
| TRAV22 | 0.14 | 1.61 | -1.47 | 0.002308 |
| ATP8B2 | 2.88 | 4 | -1.13 | 0.002172 |
| SPATC1 | -1.09 | -3.4 | 2.31 | 0.002249 |
| HOOK1 | -1.44 | 0.4 | -1.84 | 0.002254 |
| KIAA1586 | 0.86 | 2.08 | -1.22 | 0.002333 |
| RP11-134G8.7 | -1.02 | 0.88 | -1.9 | 0.002167 |
| CTD-2262B20.1 | 0.84 | 2.48 | -1.65 | 0.002183 |
| CNST | 2.68 | 3.61 | -0.93 | 0.002311 |
| NSFL1C | 4.16 | 3.28 | 0.88 | 0.002337 |
| C20orf24 | 4.52 | 3.64 | 0.88 | 0.002164 |
| BACH2 | 1.75 | 2.8 | -1.05 | 0.002193 |
| SRFBP1 | 0.76 | 2.04 | -1.28 | 0.002297 |
| IGHV3-15 | 1.48 | 2.93 | -1.45 | 0.002269 |
| RPL7P7 | -1.12 | 0.63 | -1.76 | 0.002313 |
| GPR160 | 2.46 | 1.22 | 1.23 | 0.002232 |
| FAM207A | -0.53 | 0.9 | -1.43 | 0.00222 |
| TRBV6-1 | 0.57 | 2.32 | -1.75 | 0.002308 |
| HP | -0.13 | -1.92 | 1.79 | 0.002224 |
| MTMR3 | 4.83 | 3.95 | 0.88 | 0.002329 |
| ROPN1L | 2.94 | 1.78 | 1.16 | 0.002277 |
| B3GNTL1 | 3.1 | 1.75 | 1.35 | 0.002279 |
| DPM2 | 2.24 | 3.37 | -1.13 | 0.002189 |
| RP11-159N11.4 | -1.16 | 2.24 | -3.4 | 0.002239 |
| RP11-85G21.3 | -1.14 | 1.25 | -2.38 | 0.002189 |
| RP11-122K13.7 | -0.97 | 0.62 | -1.59 | 0.002261 |
| RP3-508I15.19 | 2.39 | 1.19 | 1.2 | 0.002217 |
| ACADSB | 0.12 | 2.04 | -1.93 | 0.002206 |
| UBXN2A | -0.94 | 0.66 | -1.61 | 0.002293 |
| ASF1A | 1.87 | 3.09 | -1.22 | 0.002182 |
| H2AFY | 4.77 | 3.82 | 0.95 | 0.002357 |
| RN7SL173P | -0.3 | 1.09 | -1.38 | 0.002347 |
| RLTPR | 0.01 | 1.45 | -1.45 | 0.002351 |
| RPL22 | 1.44 | 2.6 | -1.16 | 0.002354 |
| RN7SL368P | 4.68 | 3.52 | 1.16 | 0.002369 |
| AC002456.2 | 0.27 | -1.33 | 1.59 | 0.002375 |
| ITPRIP | 4.7 | 3.75 | 0.95 | 0.002387 |
| LILRP1 | 2.45 | 1.03 | 1.42 | 0.002406 |
| PPP1R14B | -2 | 0.03 | -2.03 | 0.002412 |
| AP000318.2 | 0.13 | -1.65 | 1.78 | 0.002404 |
| SRSF8 | 2.31 | 3.27 | -0.97 | 0.002394 |
| SPTSSB | -5.01 | -1.86 | -3.16 | 0.002394 |
| RP11-632K20.2 | 0.32 | -2.34 | 2.66 | 0.002408 |
| NFKBIA | 4.57 | 3.62 | 0.95 | 0.002397 |
| IGLV3-1 | 0.71 | 2.12 | -1.41 | 0.002428 |
| SPN | 2.7 | 3.86 | -1.16 | 0.002435 |
| TRAT1 | 1.85 | 3.21 | -1.36 | 0.002459 |
| PLAUR | 4.09 | 3.12 | 0.97 | 0.002454 |
| LGR4 | -3.68 | -1.34 | -2.33 | 0.00246 |
| TSPAN5 | 1.67 | 2.85 | -1.18 | 0.002461 |
| SEC61A1 | 2.37 | 3.34 | -0.97 | 0.002461 |
| SNORD17 | 7.11 | 5.63 | 1.47 | 0.002475 |
| RP11-16E23.4 | 2.56 | 3.52 | -0.96 | 0.002474 |
| CTC-338M12.13 | 2.31 | 0.98 | 1.33 | 0.002489 |
| INPP4B | 1.34 | 2.8 | -1.46 | 0.002493 |
| PCNX | 5.39 | 4.56 | 0.83 | 0.0025 |
| LA16c-380H5.5 | 3.8 | 2.92 | 0.89 | 0.002508 |
| RPLP2 | 4.98 | 6.03 | -1.05 | 0.002528 |
| MMRN1 | -0.33 | 1.6 | -1.92 | 0.002526 |
| TPPP3 | -1.59 | 0.26 | -1.85 | 0.002547 |
| ACP1 | 1 | 2.18 | -1.18 | 0.00255 |
| RNASE6 | 5.99 | 5.08 | 0.91 | 0.002551 |
| TRAV1-1 | -0.53 | 1.17 | -1.69 | 0.002541 |
| DHRSX | 3.66 | 2.78 | 0.88 | 0.00257 |
| RRP15 | -0.2 | 1.14 | -1.34 | 0.002591 |
| AGAP9 | 0.48 | 2.01 | -1.54 | 0.002585 |
| SYNJ2-IT1 | -2.67 | -0.62 | -2.05 | 0.00257 |
| DIEXF | 0.64 | 1.9 | -1.26 | 0.00259 |
| GP1BA | -0.3 | 1.35 | -1.64 | 0.002588 |
| NDC1 | 1.01 | 2.07 | -1.07 | 0.002575 |
| PXYLP1 | 1.42 | 0.14 | 1.27 | 0.002586 |
| GAPDHP47 | -1.35 | 0.49 | -1.84 | 0.002598 |
| GDI2P2 | -0.83 | 0.8 | -1.63 | 0.002604 |
| ACP6 | 2.04 | 0.8 | 1.24 | 0.002611 |
| RP11-841C19.1 | -0.47 | 1.12 | -1.59 | 0.002697 |
| KIF13A | 3.67 | 2.61 | 1.06 | 0.002659 |
| MRPL12 | 0.89 | 1.99 | -1.09 | 0.002676 |
| TMEM204 | 1.43 | 2.77 | -1.34 | 0.002744 |
| FHL1 | -1.49 | 0.22 | -1.71 | 0.00273 |
| CENPB | 2.67 | 3.7 | -1.02 | 0.00271 |
| RNF208 | -3.16 | -0.94 | -2.22 | 0.002746 |
| RP11-81A1.6 | 6.24 | 5.27 | 0.98 | 0.002709 |
| LINC00861 | 4.62 | 5.81 | -1.19 | 0.002647 |
| SELL | 9.26 | 8.25 | 1.01 | 0.002696 |
| RNF125 | 2.37 | 3.4 | -1.03 | 0.002653 |
| CARD16 | 4.66 | 3.65 | 1.01 | 0.002731 |
| CCL5 | 5.09 | 6.41 | -1.32 | 0.002702 |
| ANPEP | 6.27 | 5.18 | 1.09 | 0.002643 |
| DYRK2 | 2.68 | 3.91 | -1.23 | 0.002695 |
| ABCE1 | 1.36 | 2.6 | -1.24 | 0.002706 |
| RPS2P46 | 6.26 | 7.19 | -0.92 | 0.002687 |
| APBB1 | -0.21 | 1.14 | -1.35 | 0.002687 |
| RP1-128M12.3 | -0.06 | 1.53 | -1.59 | 0.002739 |
| UBIAD1 | 0.87 | 1.93 | -1.05 | 0.002718 |
| TM6SF1 | 2.91 | 1.8 | 1.11 | 0.002632 |
| MCUR1 | -0.26 | 1.43 | -1.69 | 0.002677 |
| PRR5-ARHGAP8 | -4.07 | -1.29 | -2.78 | 0.002725 |
| TSR1 | 0.82 | 1.95 | -1.13 | 0.002738 |
| RP11-960L18.1 | 1.55 | 0.17 | 1.39 | 0.002678 |
| PRKAR1B | -1.46 | 0.41 | -1.87 | 0.002692 |
| RP11-520B13.8 | -2.75 | -0.16 | -2.59 | 0.002765 |
| GRWD1 | 0.22 | 1.53 | -1.31 | 0.002763 |
| ZNF526 | 1.14 | 2.16 | -1.02 | 0.002773 |
| CTD-3224K15.3 | -1.53 | 0.46 | -1.99 | 0.002781 |
| ZNF33BP1 | -3.09 | -0.61 | -2.47 | 0.002801 |
| MBOAT1 | 4.64 | 3.75 | 0.89 | 0.002818 |
| BCL7A | -1.23 | 0.25 | -1.48 | 0.002839 |
| CARD6 | 3.37 | 2.44 | 0.93 | 0.002802 |
| FCGR3B | 8.01 | 6.78 | 1.23 | 0.002836 |
| CD8BP | 0.2 | 1.79 | -1.59 | 0.00283 |
| FBXO7 | 4.8 | 6.12 | -1.33 | 0.002802 |
| MRTO4 | 0.03 | 1.44 | -1.41 | 0.002827 |
| CRTAM | -0.74 | 0.81 | -1.55 | 0.002845 |
| TFAM | 1.87 | 2.84 | -0.97 | 0.002843 |
| ALDH5A1 | 0.77 | 2.01 | -1.24 | 0.002795 |
| HSPA1A | 4.96 | 3.47 | 1.49 | 0.002827 |
| LILRA2 | 4.99 | 4 | 0.99 | 0.002823 |
| TPRKBP2 | 4.74 | 3.88 | 0.86 | 0.002804 |
| RP11-326K13.5 | 2.05 | 3.03 | -0.98 | 0.002865 |
| TRAK2 | 3.59 | 4.59 | -1 | 0.002866 |
| LMAN1 | 1.92 | 3.14 | -1.22 | 0.002875 |
| RP11-20G6.3 | -0.82 | 0.61 | -1.44 | 0.002906 |
| TRBV7-9 | 1.54 | 3.29 | -1.75 | 0.002907 |
| HIST1H3I | 2.74 | 4.19 | -1.45 | 0.002899 |
| RP11-763B22.3 | -1.78 | 0.49 | -2.26 | 0.002905 |
| KIAA0226L | 3.76 | 2.89 | 0.88 | 0.002894 |
| RGS2 | 8.16 | 6.94 | 1.22 | 0.002925 |
| RP11-672A2.4 | -0.82 | 1.05 | -1.87 | 0.002928 |
| HNRNPA1P7 | 5.75 | 6.67 | -0.93 | 0.002925 |
| KCNN4 | -0.65 | 0.7 | -1.35 | 0.002939 |
| C1orf132 | 5.13 | 4.29 | 0.83 | 0.002986 |
| PLCG2 | 4.81 | 4.03 | 0.78 | 0.002985 |
| XPO6 | 6.34 | 5.43 | 0.91 | 0.002975 |
| OPTN | 2.27 | 3.36 | -1.1 | 0.002958 |
| CCDC86 | -0.11 | 1.15 | -1.26 | 0.002959 |
| CTSD | 5.97 | 5.18 | 0.79 | 0.002984 |
| IPO7 | 2.56 | 3.59 | -1.03 | 0.002982 |
| BCKDHB | -0.14 | 1.17 | -1.31 | 0.002946 |
| STMN3 | 0.8 | 2.08 | -1.28 | 0.002968 |
| SYNGAP1 | -0.13 | 1.18 | -1.31 | 0.002957 |
| BOP1 | -0.01 | 1.25 | -1.26 | 0.002992 |
| SLC2A4RG | 0.41 | 1.65 | -1.23 | 0.002998 |
| LINC01220 | 0.96 | -1.22 | 2.18 | 0.003005 |
| PRPS1 | 1.55 | 2.72 | -1.16 | 0.003033 |
| CBX5 | 1.87 | 3.06 | -1.18 | 0.003037 |
| SPOCK2 | 3.77 | 4.97 | -1.2 | 0.003048 |
| RP11-379K17.12 | 3 | 1.41 | 1.59 | 0.003045 |
| RP11-94C24.13 | -4.77 | -1.95 | -2.82 | 0.003059 |
| TMEM245 | 1.73 | 2.77 | -1.04 | 0.003083 |
| NUTF2 | 0.68 | 1.73 | -1.05 | 0.003067 |
| KCNE3 | 5.07 | 4.13 | 0.94 | 0.003073 |
| RHOF | 2.55 | 3.43 | -0.88 | 0.003081 |
| VEGFB | 0.27 | 1.47 | -1.2 | 0.003083 |
| LEPR | -0.97 | 0.52 | -1.49 | 0.003104 |
| PDE3A | -3.1 | -0.6 | -2.51 | 0.003105 |
| SRM | 0.75 | 1.86 | -1.1 | 0.003095 |
| TAS2R13 | -0.49 | 1.11 | -1.6 | 0.003108 |
| RPL18 | 3.29 | 4.24 | -0.95 | 0.003113 |
| SEL1L3 | 1.72 | 2.82 | -1.1 | 0.003124 |
| LRRC56 | -1.42 | 0.36 | -1.78 | 0.003149 |
| CTB-41I6.2 | 2.93 | 2.05 | 0.88 | 0.003152 |
| ST13P5 | 0.91 | 2.07 | -1.16 | 0.003135 |
| HK2 | 4.93 | 3.88 | 1.04 | 0.003147 |
| SLC18B1 | 1.31 | 2.44 | -1.13 | 0.00315 |
| ZNF69 | -0.53 | 0.81 | -1.33 | 0.003162 |
| DLAT | 0.6 | 1.81 | -1.21 | 0.003184 |
| ATAD3A | -1.2 | 0.27 | -1.48 | 0.003187 |
| IL27RA | 3.09 | 4.02 | -0.93 | 0.003183 |
| RCAN3 | 2 | 3.26 | -1.26 | 0.003199 |
| CPNE5 | 0.09 | 1.27 | -1.18 | 0.003208 |
| IGKV2-28 | 0.92 | 2.5 | -1.58 | 0.003213 |
| RP11-18H21.1 | 0.57 | 2.07 | -1.5 | 0.003225 |
| RP11-968O1.5 | -1.41 | 0.71 | -2.12 | 0.00325 |
| PPRC1 | 0.88 | 2 | -1.13 | 0.003255 |
| DFNB31 | -2.29 | -0.26 | -2.03 | 0.003241 |
| CCND2 | 4.13 | 5.16 | -1.03 | 0.003262 |
| IFNGR1 | 6.27 | 5.33 | 0.95 | 0.003263 |
| ZNF703 | -1.12 | 0.95 | -2.07 | 0.00326 |
| TESPA1 | 1.58 | 2.73 | -1.15 | 0.003248 |
| MAPK13 | 4.27 | 3.43 | 0.85 | 0.003288 |
| CTU2 | -1.4 | 0.15 | -1.55 | 0.003279 |
| DOLPP1 | -0.52 | 0.87 | -1.38 | 0.003285 |
| MMP8 | 1.6 | -1.5 | 3.1 | 0.003306 |
| GPR174 | 2.99 | 4.42 | -1.43 | 0.003313 |
| CTB-31N19.3 | 4.45 | 3.61 | 0.84 | 0.003329 |
| ANKRD46 | -1.24 | 0.42 | -1.66 | 0.003348 |
| KLC2 | -1.78 | -0.08 | -1.7 | 0.00335 |
| TREML1 | 1.89 | 3.4 | -1.52 | 0.003343 |
| C1orf198 | -1.33 | 0.76 | -2.09 | 0.003341 |
| RPS2 | 3.71 | 4.48 | -0.77 | 0.003366 |
| C11orf95 | -2.32 | -0.44 | -1.87 | 0.003387 |
| AJ003147.11 | 4.3 | 3.51 | 0.79 | 0.003391 |
| PF4 | 5.18 | 7.13 | -1.94 | 0.00338 |
| RN7SKP173 | -0.68 | 1.42 | -2.11 | 0.003384 |
| IGHM | 6.07 | 7.2 | -1.13 | 0.003385 |
| SLC25A38 | 2.68 | 3.58 | -0.9 | 0.003454 |
| CTD-2054N24.2 | -0.66 | 0.78 | -1.44 | 0.003439 |
| RPS3AP29 | -0.62 | 0.89 | -1.51 | 0.003455 |
| TET1 | -0.65 | 0.79 | -1.45 | 0.003454 |
| ZNF512B | -0.68 | 0.68 | -1.37 | 0.003428 |
| JAM3 | -1.26 | 0.68 | -1.94 | 0.003448 |
| TMOD1 | 1.69 | 3.05 | -1.36 | 0.003419 |
| EFNB1 | -0.11 | 1.13 | -1.24 | 0.003451 |
| AC008065.1 | -1.55 | 0.52 | -2.07 | 0.003421 |
| THEM6 | -0.49 | 0.82 | -1.32 | 0.003441 |
| RP11-421L21.3 | -0.14 | 1.21 | -1.35 | 0.003445 |
| TPGS2 | 1.36 | 2.29 | -0.93 | 0.00346 |
| LILRA5 | 5.36 | 4.23 | 1.12 | 0.003466 |
| RP11-8L8.2 | 1.44 | -0.08 | 1.52 | 0.003516 |
| MRPS35 | 1.35 | 2.4 | -1.05 | 0.003504 |
| CD96 | 1.84 | 3.03 | -1.2 | 0.003481 |
| PCED1B-AS1 | 2.22 | 3.29 | -1.07 | 0.003515 |
| NCF1B | 4.47 | 3.41 | 1.06 | 0.003503 |
| CTC-563A5.4 | 0.82 | -1.15 | 1.96 | 0.003505 |
| AARS | 1.16 | 2.32 | -1.16 | 0.003501 |
| SEC14L5 | -2.3 | 0.07 | -2.37 | 0.003514 |
| ZNF486 | 2.81 | 1.9 | 0.9 | 0.003487 |
| AC097713.4 | 0.15 | 1.78 | -1.64 | 0.003521 |
| ERGIC1 | 5.08 | 4.03 | 1.05 | 0.003537 |
| RNF26 | 1.23 | 2.33 | -1.1 | 0.003541 |
| CMBL | -2.87 | -0.54 | -2.33 | 0.003546 |
| SAV1 | -0.01 | 1.36 | -1.37 | 0.003559 |
| CACUL1 | 4.35 | 3.61 | 0.75 | 0.00356 |
| RP11-342D11.3 | -0.03 | 1.72 | -1.75 | 0.003566 |
| DNAJC15 | 0.47 | 1.66 | -1.19 | 0.003575 |
| LNX2 | 1.3 | 2.43 | -1.14 | 0.003574 |
| SGK223 | 0.88 | 2.03 | -1.15 | 0.003596 |
| MSRB2 | 3 | 1.55 | 1.45 | 0.003586 |
| FPR1 | 9 | 7.86 | 1.14 | 0.003594 |
| C7orf73 | 2.48 | 3.64 | -1.15 | 0.003658 |
| OSCAR | 2.69 | 1.58 | 1.12 | 0.003676 |
| ZNF22 | 1.95 | 3.13 | -1.18 | 0.003658 |
| LILRA6 | 5.65 | 4.38 | 1.27 | 0.003665 |
| PANX2 | 3.22 | 2 | 1.21 | 0.003683 |
| CAAP1 | -0.59 | 0.87 | -1.46 | 0.003666 |
| OSBPL6 | -2.07 | -4.59 | 2.52 | 0.003684 |
| MAGEE1 | -0.24 | 1.13 | -1.36 | 0.003675 |
| WDR43 | 1.88 | 2.94 | -1.07 | 0.003672 |
| SCART1 | -3.17 | -1 | -2.17 | 0.003671 |
| CHST15 | 6.33 | 5.41 | 0.92 | 0.003668 |
| RP11-196G18.22 | 4.53 | 3.66 | 0.87 | 0.003651 |
| TCF7 | 1.23 | 2.58 | -1.35 | 0.003623 |
| RP11-342K6.1 | 1.37 | 2.57 | -1.2 | 0.003643 |
| ST13P4 | 1.35 | 2.41 | -1.05 | 0.003702 |
| RP11-461A8.4 | -1.97 | -0.17 | -1.8 | 0.003711 |
| TMIGD2 | 0.99 | 2.08 | -1.09 | 0.003722 |
| ABCD2 | 0.94 | 2.61 | -1.67 | 0.003723 |
| RP11-452L6.1 | -0.32 | 1.63 | -1.94 | 0.003728 |
| KDM1A | 1.15 | 2.19 | -1.05 | 0.003747 |
| HLX | 3.38 | 2.27 | 1.11 | 0.003751 |
| IMPDH2 | 1.17 | 2.12 | -0.95 | 0.003746 |
| CLSTN1 | 2.15 | 3.28 | -1.12 | 0.003763 |
| AKT3-IT1 | -0.79 | 0.99 | -1.78 | 0.003772 |
| RP11-533E19.7 | 2.79 | 1.83 | 0.97 | 0.003776 |
| CTB-131B5.2 | 2.21 | 1.08 | 1.13 | 0.003784 |
| NCKIPSD | -0.32 | 0.85 | -1.18 | 0.003793 |
| SLC22A15 | 4.33 | 3.34 | 0.98 | 0.0038 |
| GPR68 | -1.54 | 0.3 | -1.84 | 0.003806 |
| EEF2 | 7 | 7.88 | -0.88 | 0.003813 |
| THNSL1 | -0.58 | 0.75 | -1.33 | 0.003823 |
| PYCR2 | 1.49 | 2.37 | -0.88 | 0.003922 |
| AMN | -5.39 | -2.04 | -3.36 | 0.003911 |
| RP5-1041C10.3 | 3.03 | 2.21 | 0.82 | 0.00385 |
| PLCG1 | 1.46 | 2.65 | -1.2 | 0.003926 |
| NOLC1 | 0.26 | 1.48 | -1.22 | 0.003898 |
| AC079250.1 | 3.98 | 4.95 | -0.97 | 0.003931 |
| PCED1B | 0.35 | 1.54 | -1.18 | 0.003867 |
| GADD45A | 1.44 | 0.11 | 1.32 | 0.003903 |
| RCC2 | 3.1 | 3.96 | -0.86 | 0.003923 |
| IGHV3-23 | 2.96 | 3.88 | -0.92 | 0.003846 |
| LIMA1 | -1.31 | 0.23 | -1.53 | 0.003842 |
| PLAC8 | 3.39 | 4.46 | -1.06 | 0.003868 |
| PPP2R5A | 5.83 | 5.02 | 0.81 | 0.003886 |
| STRADBP1 | 1.18 | 2.55 | -1.37 | 0.003867 |
| DENND4A | 3.59 | 4.4 | -0.82 | 0.003932 |
| UBAC2-AS1 | -1.49 | 0.08 | -1.57 | 0.003922 |
| XIAP | 1.3 | -0.22 | 1.52 | 0.003899 |
| SUN2 | 3.98 | 4.81 | -0.82 | 0.003903 |
| RP13-104F24.2 | 4.55 | 3.73 | 0.82 | 0.003871 |
| RP11-925D8.3 | 5.77 | 4.56 | 1.21 | 0.003925 |
| KPNA5 | 1.1 | 2.38 | -1.28 | 0.003959 |
| TCAF1P1 | -0.62 | 1.11 | -1.73 | 0.003962 |
| TRGC1 | 3.2 | 4.52 | -1.32 | 0.004135 |
| EEF2K | 0.39 | 1.62 | -1.23 | 0.004163 |
| CEACAM6 | 1.24 | -1.04 | 2.28 | 0.004035 |
| AES | 2.26 | 3.24 | -0.98 | 0.004117 |
| TMEM56 | 1.2 | 2.53 | -1.33 | 0.00413 |
| PPM1L | 0.49 | 1.58 | -1.09 | 0.003995 |
| ENTPD5 | -0.12 | 1.05 | -1.17 | 0.003973 |
| PDK4 | 2.54 | 1.21 | 1.33 | 0.004051 |
| MT1X | -0.16 | 1.09 | -1.25 | 0.004111 |
| SVILP1 | 0.24 | -1.32 | 1.56 | 0.004028 |
| MYO1C | -1.14 | 0.26 | -1.4 | 0.00408 |
| RP11-22N19.2 | 3.16 | 1.63 | 1.53 | 0.00415 |
| ZNF354C | 0.51 | 1.74 | -1.22 | 0.00403 |
| NEDD9 | 4.35 | 3.49 | 0.86 | 0.004058 |
| OTUD4 | 1.93 | 3 | -1.07 | 0.004047 |
| TRAV12-3 | 1.33 | 2.89 | -1.55 | 0.004027 |
| RP11-567F11.2 | -1.11 | 0.55 | -1.66 | 0.004068 |
| RP11-139H15.6 | 4.26 | 3.19 | 1.07 | 0.004143 |
| RP11-362K14.7 | 0.2 | 1.7 | -1.5 | 0.004125 |
| NAA40 | -0.77 | 1.05 | -1.81 | 0.004144 |
| RNF149 | 7.15 | 6.3 | 0.85 | 0.00398 |
| SLC35F2 | -2.61 | -0.68 | -1.94 | 0.004077 |
| CCDC124 | 1.6 | 2.54 | -0.94 | 0.004015 |
| ARL11 | 5.1 | 4.18 | 0.92 | 0.004089 |
| LRRC4 | 4.89 | 3.93 | 0.96 | 0.004004 |
| SLC25A42 | 0.87 | 1.94 | -1.07 | 0.004127 |
| SH2B3 | 3.94 | 4.67 | -0.73 | 0.004173 |
| MCTP2 | 4.96 | 4.12 | 0.85 | 0.00415 |
| RP11-678G14.4 | 2.14 | 0.26 | 1.88 | 0.004093 |
| GATS | 2.57 | 1.45 | 1.13 | 0.004004 |
| RORA | 1.78 | 3.95 | -2.17 | 0.004069 |
| TMEM170B | 4.47 | 3.4 | 1.07 | 0.004165 |
| ATF4P2 | 0.04 | -1.68 | 1.72 | 0.004018 |
| PLA2G4B | -1.39 | 0.44 | -1.83 | 0.004143 |
| MIR3945HG | 1.6 | 0.06 | 1.53 | 0.00405 |
| ELANE | 1.54 | -0.81 | 2.35 | 0.004012 |
| TTC39B | 0.88 | 1.99 | -1.11 | 0.004159 |
| NOP14 | 0.99 | 2.11 | -1.12 | 0.004168 |
| IGHG1 | 1.96 | 3.73 | -1.77 | 0.004108 |
| AC079630.4 | 4.5 | 3.47 | 1.03 | 0.004176 |
| APTR | 1.34 | 0.29 | 1.05 | 0.004106 |
| PPP1R3B | 5.44 | 4.5 | 0.94 | 0.004133 |
| SLC39A10 | 1.48 | 2.54 | -1.06 | 0.004182 |
| CPEB4 | 2.96 | 2.17 | 0.79 | 0.004202 |
| MAP1A | -1.35 | 0.55 | -1.91 | 0.0042 |
| PFKFB4 | 4.48 | 3.57 | 0.91 | 0.004366 |
| PTPRCAP | 4.41 | 5.74 | -1.33 | 0.004255 |
| ALOX5 | 5.99 | 5.13 | 0.86 | 0.004369 |
| STK17B | 7.44 | 6.61 | 0.83 | 0.004328 |
| RP11-152H18.3 | -1.35 | 0.18 | -1.52 | 0.004315 |
| GCA | 6.26 | 5.15 | 1.1 | 0.004357 |
| DAB2 | 0.27 | 1.46 | -1.19 | 0.004265 |
| LIMD1 | 1.75 | 2.67 | -0.92 | 0.004377 |
| ABCF2 | 1.49 | 2.58 | -1.1 | 0.004294 |
| PRKAR2B | 3.14 | 4.74 | -1.6 | 0.004215 |
| GEMIN4 | -0.8 | 0.48 | -1.28 | 0.004377 |
| PRKCH | 3.01 | 3.99 | -0.97 | 0.004347 |
| WDR76 | -0.17 | 1.17 | -1.34 | 0.004329 |
| RAB30 | -0.02 | 1.2 | -1.22 | 0.004327 |
| TRAV19 | 1.39 | 2.81 | -1.42 | 0.004354 |
| STOML2 | 1.74 | 2.63 | -0.89 | 0.004307 |
| SERPINB8 | 0.65 | 1.73 | -1.08 | 0.004254 |
| MTCO1P31 | -1.72 | 0.67 | -2.38 | 0.004375 |
| S100A6 | 6.73 | 5.82 | 0.92 | 0.004282 |
| HSPBAP1 | 4.15 | 3.38 | 0.77 | 0.004224 |
| AC003080.4 | 3.13 | 1.01 | 2.12 | 0.004219 |
| OBSCN | -0.5 | 1.11 | -1.61 | 0.004341 |
| AL354822.1 | -2.01 | 1.73 | -3.74 | 0.004248 |
| BEND2 | 0.18 | 1.98 | -1.8 | 0.004269 |
| SLFN14 | 0.2 | 1.55 | -1.34 | 0.004319 |
| PURA | 2.05 | 3.05 | -0.99 | 0.004294 |
| HYOU1 | 0.83 | 2.02 | -1.19 | 0.004379 |
| RRAGD | 2.84 | 1.91 | 0.93 | 0.004308 |
| TCTN3 | 0 | 1.21 | -1.22 | 0.004333 |
| LRBA | 2.5 | 3.59 | -1.09 | 0.004351 |
| ZNF593 | -1.64 | -0.08 | -1.56 | 0.004276 |
| AC093642.3 | -0.45 | 1.16 | -1.62 | 0.004318 |
| RPS19 | 4.01 | 4.87 | -0.86 | 0.004285 |
| RPL7P49 | 0.06 | 1.25 | -1.2 | 0.00437 |
| PLTP | -3.2 | -1.21 | -1.99 | 0.004388 |
| SRGN | 10.15 | 8.78 | 1.37 | 0.004391 |
| UBXN2B | 5.7 | 4.9 | 0.8 | 0.004396 |
| RP11-44F14.8 | 4.73 | 3.76 | 0.98 | 0.004419 |
| CTD-2012K14.5 | -0.43 | 1.04 | -1.47 | 0.004421 |
| OSBPL3 | 1.02 | 2.24 | -1.22 | 0.004456 |
| MAP3K3 | 4.89 | 4.09 | 0.8 | 0.004463 |
| TRMT13 | 1.35 | 2.48 | -1.13 | 0.004456 |
| ABCC5 | 3.15 | 2.18 | 0.97 | 0.004463 |
| MPRIPP1 | -0.33 | 1.03 | -1.36 | 0.004464 |
| RPL10AP6 | 2.08 | 2.97 | -0.9 | 0.004463 |
| LDHB | 3.04 | 4.07 | -1.03 | 0.004486 |
| OR7E7P | 1.12 | 2.41 | -1.29 | 0.004504 |
| EML5 | -2.07 | -0.36 | -1.7 | 0.004499 |
| DGCR12 | 4.17 | 3.3 | 0.86 | 0.004519 |
| LTA | -0.69 | 0.86 | -1.54 | 0.004525 |
| GFI1B | 0.59 | 2.42 | -1.83 | 0.004534 |
| ELOVL7 | -0.9 | 0.83 | -1.73 | 0.004546 |
| TRUB1 | 1.04 | 2.05 | -1.01 | 0.004551 |
| ATP10D | 1.02 | 2.02 | -1 | 0.004556 |
| BET1P1 | -0.73 | 1.87 | -2.61 | 0.00458 |
| FZD3 | -2.88 | -0.92 | -1.97 | 0.004575 |
| LEF1 | 1.4 | 2.65 | -1.25 | 0.004572 |
| RP11-372B4.3 | -0.04 | 1.74 | -1.78 | 0.004587 |
| LINC00282 | 3.98 | 3.08 | 0.9 | 0.004584 |
| LMTK2 | 4.53 | 3.64 | 0.89 | 0.004611 |
| GAMT | -1.07 | 0.26 | -1.33 | 0.004613 |
| ACVR1B | 2.53 | 1.05 | 1.48 | 0.004637 |
| CR1 | 5.22 | 4.17 | 1.05 | 0.004627 |
| MYBPH | -0.2 | -1.82 | 1.62 | 0.004631 |
| ITGB7 | 1.71 | 2.87 | -1.16 | 0.004636 |
| CLDN9 | 2.11 | 0.98 | 1.13 | 0.004647 |
| ACER2 | 0.05 | 1.16 | -1.12 | 0.004653 |
| MTA2 | 2.87 | 3.69 | -0.82 | 0.004676 |
| PWAR5 | 2.1 | 3.38 | -1.28 | 0.004681 |
| MFSD14B | 5.3 | 4.51 | 0.8 | 0.00468 |
| DEFA4 | 2.69 | -0.11 | 2.8 | 0.004672 |
| RPL23AP53 | -1.06 | 0.35 | -1.4 | 0.004702 |
| GTF2IP4 | 3.56 | 2.69 | 0.86 | 0.004699 |
| ORAI2 | 3.63 | 2.65 | 0.98 | 0.004713 |
| CXCL16 | 3.85 | 2.92 | 0.93 | 0.004732 |
| TBC1D4 | 1.04 | 2.3 | -1.26 | 0.004734 |
| TBC1D14 | 4.4 | 3.55 | 0.84 | 0.004727 |
| TRIB2 | 2.65 | 3.72 | -1.07 | 0.004736 |
| UXS1 | 0.82 | 1.84 | -1.02 | 0.004762 |
| ALMS1 | 1.33 | 2.46 | -1.13 | 0.004767 |
| CEBPD | 5.83 | 4.46 | 1.37 | 0.004829 |
| LRFN3 | -1.73 | -0.19 | -1.54 | 0.004816 |
| NT5E | -0.4 | 1.03 | -1.43 | 0.004801 |
| AGPAT5 | -0.46 | 1.02 | -1.49 | 0.004803 |
| ZAP70 | 2.74 | 3.97 | -1.23 | 0.00481 |
| WDR89 | -0.58 | 0.81 | -1.39 | 0.004801 |
| AF131215.9 | 0.45 | 1.99 | -1.54 | 0.004824 |
| ANKS1A | 3.55 | 2.78 | 0.77 | 0.004796 |
| KIAA0825 | 2.53 | 1.61 | 0.91 | 0.004821 |
| RP3-405J10.3 | -2.43 | -0.68 | -1.75 | 0.004872 |
| COPS8P2 | -0.16 | 1.3 | -1.46 | 0.004879 |
| RP3-453I5.2 | 0.14 | 1.93 | -1.78 | 0.004893 |
| PANX1 | 1.01 | 2.07 | -1.05 | 0.00489 |
| GATSL2 | 2.61 | 1.63 | 0.99 | 0.004936 |
| IRAK1BP1 | -2.69 | -0.46 | -2.23 | 0.004958 |
| LINC00431 | -1.66 | 0.26 | -1.92 | 0.004969 |
| CTSF | -1.81 | 0 | -1.81 | 0.004967 |
| NME8 | 2.09 | 0.95 | 1.14 | 0.004978 |
| OXER1 | 3.47 | 2.06 | 1.41 | 0.004981 |
| WSB1 | 4.14 | 3.41 | 0.73 | 0.00499 |
| OLMALINC | -2.52 | -0.53 | -1.99 | 0.005043 |
| TTC24 | -1.78 | 0.13 | -1.91 | 0.005025 |
| TAS2R15P | 0.96 | 2.34 | -1.38 | 0.005031 |
| RP11-284N8.3 | 3.11 | 4.44 | -1.33 | 0.005045 |
| RP11-230F18.5 | 2.76 | 1.62 | 1.13 | 0.005036 |
| CSRP2BP | 0.6 | 1.64 | -1.04 | 0.005026 |
| HAPLN3 | 0.36 | 1.69 | -1.33 | 0.005026 |
| EEF1DP7 | 4.32 | 3.41 | 0.92 | 0.005056 |
| ZFP14 | 1.18 | 2.23 | -1.05 | 0.005124 |
| SIPA1L2 | 3.65 | 2.21 | 1.44 | 0.005101 |
| TAS2R60 | -0.86 | 0.66 | -1.52 | 0.005144 |
| ALOX12 | 0.23 | 2.26 | -2.04 | 0.005083 |
| RP1-229K20.5 | 4.57 | 3.28 | 1.29 | 0.005076 |
| ENO2 | -0.17 | 1.19 | -1.36 | 0.005105 |
| RP11-511I11.2 | 0.81 | -0.47 | 1.28 | 0.005102 |
| CTA-268H5.12 | 3.27 | 2.38 | 0.88 | 0.005094 |
| DYNLT1 | 4.32 | 3.43 | 0.89 | 0.005144 |
| CAPNS2 | 2.33 | 1.29 | 1.03 | 0.005133 |
| C1QBP | 1.47 | 2.48 | -1.01 | 0.005135 |
| LZTS2 | -0.59 | 0.94 | -1.53 | 0.005145 |
| HEATR1 | 1.79 | 2.87 | -1.08 | 0.005073 |
| LRFN4 | -2.17 | -0.45 | -1.72 | 0.00511 |
| RAB11FIP4 | 3.1 | 2.24 | 0.85 | 0.005142 |
| AC068134.10 | -0.97 | 1.64 | -2.61 | 0.00513 |
| PDGFB | -2.06 | -0.16 | -1.9 | 0.005259 |
| CPSF1 | 1.63 | 2.55 | -0.92 | 0.005206 |
| PIP4K2A | 5.49 | 6.31 | -0.82 | 0.005173 |
| CAMK4 | 1.85 | 3.03 | -1.18 | 0.00526 |
| RP11-362F19.1 | 0.77 | 1.93 | -1.16 | 0.0052 |
| UST | 0.1 | 1.42 | -1.33 | 0.005194 |
| FRY | 4.5 | 3.65 | 0.85 | 0.005254 |
| EIF1AXP1 | 2.64 | 3.76 | -1.12 | 0.00518 |
| SIRPD | 3.38 | 2.34 | 1.04 | 0.005262 |
| AC006011.4 | 1.5 | -1.5 | 3 | 0.005192 |
| VPS13A | 1.58 | 2.58 | -1 | 0.005226 |
| WDR46 | 0.6 | 1.62 | -1.02 | 0.005261 |
| AHSG | -2.53 | -0.4 | -2.13 | 0.005196 |
| RPL18AP3 | 7.43 | 8.35 | -0.92 | 0.005243 |
| ZBTB25 | 1.3 | 2.5 | -1.2 | 0.005225 |
| TRPC1 | -3.31 | -1.13 | -2.19 | 0.005249 |
| H2AFY2 | -1.55 | -0.03 | -1.52 | 0.005164 |
| CCR6 | -0.52 | 1.16 | -1.68 | 0.005162 |
| MATK | 0.56 | 1.96 | -1.4 | 0.005234 |
| ZNF783 | 0.69 | 1.82 | -1.12 | 0.005186 |
| OR7E140P | -1.28 | -3.39 | 2.1 | 0.005261 |
| STXBP5 | 4.8 | 4.1 | 0.7 | 0.005272 |
| H1F0 | 1.95 | 3.02 | -1.08 | 0.005284 |
| RPL23AP42 | 7.87 | 8.86 | -0.99 | 0.005285 |
| NACAP3 | 0.89 | -1.52 | 2.41 | 0.005325 |
| TUBB1 | 5.33 | 6.95 | -1.62 | 0.005317 |
| NDUFAF3 | 1.4 | 2.35 | -0.95 | 0.005316 |
| TBCEL | 0.33 | 1.54 | -1.21 | 0.005326 |
| PPARGC1B | -0.44 | 0.78 | -1.22 | 0.005325 |
| NQO2 | 3.09 | 2.23 | 0.86 | 0.005392 |
| THEMIS | 1.94 | 2.98 | -1.04 | 0.005411 |
| SSX2IP | -0.03 | 1.22 | -1.25 | 0.005365 |
| RP11-747H7.3 | 0.39 | 2.06 | -1.67 | 0.00542 |
| HECW2 | 0.85 | -0.36 | 1.21 | 0.00537 |
| ZNF287 | -0.98 | 0.4 | -1.38 | 0.005377 |
| RN7SL288P | 5.89 | 4.99 | 0.9 | 0.005418 |
| PPP1R3D | 4.23 | 3.46 | 0.77 | 0.005355 |
| TRAV13-2 | 0.62 | 2.32 | -1.71 | 0.005334 |
| POLR1E | 0.79 | 1.97 | -1.18 | 0.005363 |
| ICA1 | -0.69 | -2.28 | 1.59 | 0.005412 |
| NCF1 | 4.79 | 3.79 | 1.01 | 0.005411 |
| AMIGO2 | -1.09 | 0.36 | -1.45 | 0.005349 |
| TWSG1 | -0.2 | 0.91 | -1.1 | 0.005366 |
| CDK14 | 2.39 | 1.52 | 0.87 | 0.005397 |
| SGPP1 | 2.48 | 3.4 | -0.92 | 0.00538 |
| ABI3 | 2.28 | 3.29 | -1.01 | 0.005392 |
| RTN3P1 | 4.73 | 3.51 | 1.21 | 0.005455 |
| RASSF1-AS1 | 0.95 | -1.07 | 2.03 | 0.005435 |
| CKLF | 4.84 | 4.02 | 0.82 | 0.005459 |
| MAP4K1 | 1.94 | 2.99 | -1.06 | 0.005451 |
| RP11-415F23.3 | 2.7 | 3.65 | -0.95 | 0.005452 |
| RP11-19J5.1 | 0.58 | -1.79 | 2.37 | 0.005464 |
| TRAV29DV5 | 0.23 | 2.13 | -1.91 | 0.005433 |
| CCR7 | 3.72 | 4.59 | -0.88 | 0.005467 |
| IGKV1-12 | 0.9 | 3.81 | -2.92 | 0.005484 |
| AL450992.2 | 0.06 | 2.59 | -2.53 | 0.005479 |
| MLEC | 2.8 | 3.61 | -0.81 | 0.005488 |
| BNIP3L | 6.05 | 7.4 | -1.36 | 0.00552 |
| MPL | -2.33 | 0.98 | -3.31 | 0.005524 |
| IDE | 0.99 | 2 | -1.01 | 0.005531 |
| NUP210 | 3.73 | 4.71 | -0.98 | 0.005665 |
| POU2F2 | 0.95 | 1.87 | -0.92 | 0.005679 |
| CYP4V2 | 0.44 | 1.59 | -1.16 | 0.005636 |
| SMARCB1 | 1.51 | 2.4 | -0.88 | 0.005625 |
| LAGE3 | -0.6 | 0.89 | -1.49 | 0.00568 |
| SRRD | 1.96 | 2.81 | -0.85 | 0.005664 |
| TAS2R18 | 2.14 | 3.39 | -1.25 | 0.005639 |
| DHFRP1 | 3.36 | 2.32 | 1.03 | 0.005632 |
| LTBP1 | -0.52 | 1.08 | -1.6 | 0.005608 |
| PWP1 | 1.85 | 2.83 | -0.98 | 0.005655 |
| RN7SKP134 | 3.23 | 1.38 | 1.86 | 0.00562 |
| ICAM2 | 1.23 | 2.16 | -0.93 | 0.005654 |
| TFPI | -2.48 | -0.8 | -1.69 | 0.005685 |
| RNF130 | 4.07 | 3.29 | 0.78 | 0.005627 |
| MAP3K7CL | 1.21 | 2.42 | -1.21 | 0.005635 |
| CDK6 | 1.56 | 2.66 | -1.1 | 0.005551 |
| DOCK9 | 0.92 | 2.04 | -1.12 | 0.005555 |
| GPR27 | 4.16 | 3.1 | 1.07 | 0.005656 |
| OPN3 | 0.09 | 1.31 | -1.22 | 0.005601 |
| PES1 | 0.4 | 1.41 | -1.02 | 0.005556 |
| ATP11A | 3.32 | 2.58 | 0.74 | 0.005541 |
| FAM117A | 3.31 | 4.11 | -0.8 | 0.005576 |
| RP11-511B23.2 | -0.77 | -2.8 | 2.03 | 0.005595 |
| RAD23A | 1.7 | 2.72 | -1.02 | 0.005678 |
| RP4-675C20.4 | 0.28 | 1.51 | -1.24 | 0.005681 |
| PELP1 | -0.34 | 0.85 | -1.18 | 0.005621 |
| YARS2 | 0.83 | 1.87 | -1.04 | 0.00561 |
| RP11-933H2.4 | 0.46 | -1.02 | 1.48 | 0.005564 |
| CYP4F2 | -0.62 | -2.58 | 1.96 | 0.005706 |
| DLGAP1-AS2 | 2.19 | 0.92 | 1.28 | 0.005697 |
| KLRG1 | 1.33 | 3.19 | -1.86 | 0.005701 |
| PDCD2L | -1.35 | 0.03 | -1.38 | 0.005731 |
| CLTCL1 | 0.59 | -0.67 | 1.26 | 0.005734 |
| AP5B1 | 6.13 | 5.16 | 0.96 | 0.005727 |
| SCAMP3 | 1.05 | 2 | -0.95 | 0.005743 |
| HCG2040054 | -2.08 | 0.08 | -2.15 | 0.005745 |
| SF3B3 | 2.25 | 3.18 | -0.93 | 0.005773 |
| NOM1 | 0.62 | 1.66 | -1.03 | 0.005799 |
| ST3GAL5 | 0.62 | 1.84 | -1.22 | 0.00578 |
| HSDL2 | 4.19 | 3.41 | 0.79 | 0.005787 |
| AC083873.4 | 0.19 | 1.21 | -1.03 | 0.005801 |
| DPP4 | 0.57 | 2.24 | -1.68 | 0.005792 |
| PDCD11 | 1.37 | 2.41 | -1.04 | 0.005859 |
| AC093484.4 | -0.14 | 1.38 | -1.53 | 0.00584 |
| UCKL1 | 0.61 | 1.81 | -1.2 | 0.005861 |
| ENG | -0.17 | 1.06 | -1.23 | 0.005839 |
| TRAV8-4 | -0.68 | 2.53 | -3.21 | 0.005865 |
| FAM3C2 | 1.43 | 2.88 | -1.45 | 0.005842 |
| MAGED2 | 1.42 | 2.28 | -0.86 | 0.005863 |
| ZDHHC8 | -0.02 | 1.19 | -1.2 | 0.005855 |
| SSBP4 | 0.88 | 2.14 | -1.27 | 0.005883 |
| IGKV3D-20 | -0.85 | 0.39 | -1.24 | 0.005886 |
| CARD11 | 3.22 | 4.18 | -0.96 | 0.005887 |
| SCFD2 | 1.17 | 2.09 | -0.92 | 0.005884 |
| PSMF1 | 3.24 | 4.23 | -0.99 | 0.005928 |
| RITA1 | -0.25 | 0.95 | -1.19 | 0.005932 |
| RP11-363E7.4 | -0.56 | 0.93 | -1.48 | 0.005894 |
| C6orf25 | 1.46 | 3.35 | -1.89 | 0.00591 |
| LY6G6F | 0.65 | 2.47 | -1.82 | 0.005938 |
| BZW2 | 0.41 | 1.47 | -1.06 | 0.005929 |
| BTBD2 | 1.51 | 2.4 | -0.89 | 0.005933 |
| ZNF664 | 0.52 | 1.75 | -1.23 | 0.005917 |
| BCAS4 | 0.01 | 1.19 | -1.18 | 0.005925 |
| SULF2 | 4.06 | 3.26 | 0.81 | 0.005945 |
| TSPY26P | -1.96 | -0.13 | -1.84 | 0.005952 |
| C10orf54 | 8.02 | 7.15 | 0.87 | 0.005962 |
| CYB5R4 | 4.89 | 4.16 | 0.73 | 0.006119 |
| TANGO6 | 0.88 | 2 | -1.12 | 0.006062 |
| AC024704.2 | 0.16 | 1.26 | -1.1 | 0.006004 |
| RAB11FIP3 | -0.15 | 1.08 | -1.23 | 0.00612 |
| APOL3 | 1.14 | 2.3 | -1.16 | 0.005988 |
| PRPF19 | 2.23 | 3.27 | -1.04 | 0.006015 |
| SEPT7P8 | -0.63 | -2.65 | 2.02 | 0.006052 |
| CTA-276F8.1 | -1.55 | 0.46 | -2.01 | 0.006 |
| CD79A | 3.3 | 4.41 | -1.11 | 0.006076 |
| TRAV23DV6 | -0.07 | 1.95 | -2.02 | 0.006116 |
| CA2 | 1.36 | 2.8 | -1.44 | 0.006101 |
| RNF14 | 1.46 | 2.3 | -0.85 | 0.006038 |
| CTB-50L17.14 | 2.85 | 0.99 | 1.86 | 0.006073 |
| TMEM173 | 0.68 | 1.82 | -1.15 | 0.006077 |
| TRMT61A | -0.06 | 1.45 | -1.51 | 0.006084 |
| CRK | 4.22 | 3.49 | 0.73 | 0.006059 |
| CCL28 | -0.83 | 0.66 | -1.49 | 0.006094 |
| RP11-34P13.7 | 0.41 | -1.08 | 1.49 | 0.006077 |
| FKBP4 | 1.02 | 2 | -0.98 | 0.006004 |
| IGHV3-43 | -0.28 | 1.36 | -1.65 | 0.006024 |
| RNF5 | 3.16 | 3.86 | -0.69 | 0.006115 |
| ARHGAP32 | -2.58 | -0.75 | -1.83 | 0.006076 |
| NCF4 | 7.11 | 6.06 | 1.06 | 0.006111 |
| RPL36 | 1.93 | 3.08 | -1.15 | 0.006021 |
| ZNF395 | 1.34 | 2.25 | -0.91 | 0.006038 |
| ITGA6 | 1.59 | 2.49 | -0.9 | 0.00613 |
| CTD-2542L18.1 | 1.64 | 2.49 | -0.85 | 0.006139 |
| MAN1B1-AS1 | -1.87 | -0.36 | -1.52 | 0.006157 |
| TMEM71 | 5.48 | 4.78 | 0.7 | 0.006224 |
| EVL | 3.41 | 4.48 | -1.08 | 0.006196 |
| ZBTB4 | 3.42 | 4.33 | -0.91 | 0.006184 |
| PHTF1 | 2.05 | 1.12 | 0.93 | 0.006181 |
| TRIM28 | 2.24 | 3.06 | -0.82 | 0.006229 |
| RN7SL681P | 3.89 | 2.95 | 0.94 | 0.006189 |
| IKZF3 | 2.71 | 3.86 | -1.15 | 0.006237 |
| DLEU1 | -2.75 | -1 | -1.75 | 0.006196 |
| GPR84 | -0.7 | -2.9 | 2.21 | 0.006213 |
| KIR2DL1 | 1.26 | 0.1 | 1.16 | 0.006212 |
| SLC4A10 | -2.82 | 0.23 | -3.05 | 0.006228 |
| LTBP3 | -0.15 | 1.1 | -1.25 | 0.006235 |
| ST13P18 | -1.92 | 0.11 | -2.03 | 0.006237 |
| ASCC2 | 3.32 | 4.26 | -0.94 | 0.006248 |
| CTC-378H22.1 | 0.38 | 1.57 | -1.19 | 0.00625 |
| EXOC6B | 0.3 | 1.44 | -1.14 | 0.006265 |
| CUEDC1 | 1.53 | 0.6 | 0.93 | 0.006294 |
| C7orf26 | 1.2 | 2.07 | -0.87 | 0.006289 |
| TAS2R5 | 0.01 | 1.4 | -1.38 | 0.006294 |
| TRAV10 | 1.23 | 2.54 | -1.31 | 0.00629 |
| OST4 | 5.03 | 5.92 | -0.89 | 0.006296 |
| RP13-516M14.1 | 3.59 | 2.5 | 1.08 | 0.00632 |
| SLC22A4 | 4.42 | 3.21 | 1.21 | 0.006344 |
| FLT4 | -3.45 | -1.09 | -2.36 | 0.006334 |
| UBQLN4P1 | -0.13 | 1.03 | -1.16 | 0.006381 |
| NBEAL2 | 5.71 | 4.95 | 0.76 | 0.006416 |
| AC006947.1 | -1.69 | 0 | -1.69 | 0.006423 |
| RP11-35G9.3 | 1.72 | 2.59 | -0.86 | 0.006386 |
| SLC25A6 | 4.87 | 5.63 | -0.76 | 0.006416 |
| LRRK2 | 7.13 | 6.28 | 0.85 | 0.00642 |
| AP5S1 | -1.44 | 0.12 | -1.56 | 0.006418 |
| UBL4A | 0.89 | 1.97 | -1.08 | 0.00635 |
| ST20-MTHFS | 3.52 | 2.45 | 1.07 | 0.006334 |
| ACYP1 | 0.03 | 1.19 | -1.17 | 0.006422 |
| ITGA3 | -4.78 | -1.96 | -2.82 | 0.006421 |
| SOCS7 | -0.1 | 1.2 | -1.31 | 0.006422 |
| NAA30 | 0 | 1.56 | -1.57 | 0.006423 |
| DCHS1 | -1.52 | 0.34 | -1.86 | 0.006404 |
| LINC01372 | 0.2 | 1.33 | -1.13 | 0.006355 |
| IRS1 | -1.46 | -0.02 | -1.44 | 0.006355 |
| RPL18A | 2.85 | 3.64 | -0.79 | 0.006427 |
| PNP | 1.41 | 2.33 | -0.92 | 0.006439 |
| SALL2 | -3.42 | -1.43 | -1.99 | 0.006447 |
| PTPN4 | 2.85 | 3.89 | -1.04 | 0.006449 |
| CXCR2P1 | 2.16 | 3.8 | -1.63 | 0.006474 |
| RPL7AP6 | 7.11 | 7.96 | -0.85 | 0.00648 |
| IFRD1 | 3.9 | 2.99 | 0.91 | 0.006491 |
| RSG1 | -1.69 | 0.2 | -1.89 | 0.0065 |
| AC007278.3 | 4.05 | 2.09 | 1.96 | 0.006518 |
| TRAV3 | 0.94 | 2.65 | -1.7 | 0.006517 |
| LINC00671 | 1.24 | -0.55 | 1.79 | 0.006526 |
| DUSP5 | 0.49 | 1.72 | -1.23 | 0.006553 |
| ETAA1 | 1.34 | 2.38 | -1.04 | 0.006539 |
| TRAV8-3 | 1.05 | 2.6 | -1.55 | 0.006549 |
| G0S2 | 1.75 | -0.05 | 1.81 | 0.00655 |
| CMPK1 | 3.48 | 4.29 | -0.82 | 0.006583 |
| SLC2A6 | 0.64 | 1.59 | -0.95 | 0.006625 |
| PDE3B | 4.73 | 4.05 | 0.68 | 0.006617 |
| ATP1B2 | -3.75 | -1.42 | -2.34 | 0.00664 |
| LINC00638 | -1.44 | 0.1 | -1.53 | 0.006661 |
| RP1-257A7.4 | 1.8 | 0.66 | 1.14 | 0.006611 |
| YBX1P1 | 3.18 | 4.17 | -0.99 | 0.006626 |
| PHLDB2 | -2.28 | -0.42 | -1.86 | 0.00666 |
| PVRIG | 1.93 | 3.49 | -1.56 | 0.006662 |
| RP11-676J12.9 | -0.71 | 0.85 | -1.56 | 0.00666 |
| ITGA2B | 1.19 | 3.14 | -1.95 | 0.006604 |
| LRRC8C | 2.34 | 3.37 | -1.03 | 0.006675 |
| RP11-981G7.1 | 1.44 | 0.43 | 1.02 | 0.006639 |
| GATA3 | -0.09 | 1.41 | -1.5 | 0.006674 |
| ADCY4 | -0.15 | -1.55 | 1.4 | 0.0066 |
| UCP2 | 4.09 | 4.87 | -0.78 | 0.006625 |
| HIF1A | 5.21 | 4.21 | 1.01 | 0.006621 |
| RP11-173P15.9 | -0.31 | 0.84 | -1.16 | 0.006652 |
| CCDC57 | 1.56 | 0.58 | 0.98 | 0.006721 |
| RP11-463O12.5 | 3.75 | 3 | 0.75 | 0.006718 |
| GADD45GIP1 | -0.25 | 1 | -1.25 | 0.006709 |
| RP1-92O14.3 | -1.81 | 0.25 | -2.06 | 0.006691 |
| FCER2 | -0.74 | 0.93 | -1.67 | 0.006698 |
| MTND1P32 | -1.59 | -0.02 | -1.57 | 0.006691 |
| ZNF157 | -2.74 | -0.69 | -2.05 | 0.006722 |
| CD3D | 3.44 | 4.78 | -1.34 | 0.006731 |
| KIF20B | 0.66 | 1.68 | -1.02 | 0.006752 |
| SCARNA5 | 8.89 | 7.41 | 1.48 | 0.006764 |
| PARD3 | -3.23 | -0.83 | -2.4 | 0.006755 |
| GUCY1B3 | -0.36 | 1.08 | -1.45 | 0.006799 |
| ABCG1 | 3.99 | 3.21 | 0.79 | 0.006807 |
| SERPINE2 | -4.15 | -1.49 | -2.67 | 0.006873 |
| CHIC1 | -0.54 | 0.98 | -1.52 | 0.006869 |
| MSX2P1 | -0.48 | 1.75 | -2.23 | 0.00685 |
| CLIC4 | 1.83 | 2.66 | -0.83 | 0.006862 |
| PTMA | 2.8 | 3.51 | -0.71 | 0.006872 |
| EIF3CL | 2.84 | 3.75 | -0.9 | 0.006854 |
| TSPAN13 | 1.05 | 1.98 | -0.93 | 0.006837 |
| RASA3-IT1 | 2.25 | 3.17 | -0.92 | 0.006867 |
| AC004453.8 | 5.55 | 6.43 | -0.88 | 0.006848 |
| FRY-AS1 | 0.99 | -0.1 | 1.09 | 0.006885 |
| ANXA3 | 3.1 | 1.54 | 1.56 | 0.006889 |
| SCARB1 | -0.91 | 0.57 | -1.48 | 0.006945 |
| IGLV3-19 | 2.16 | 3.47 | -1.3 | 0.006936 |
| CD40 | -0.05 | 1.12 | -1.16 | 0.006929 |
| RP11-62H7.2 | -1.11 | 0.33 | -1.44 | 0.006958 |
| POLA1 | 0.31 | 1.48 | -1.17 | 0.006967 |
| TNFRSF13C | 2.07 | 3.1 | -1.03 | 0.007014 |
| ZNF428 | 0.34 | 1.5 | -1.16 | 0.007005 |
| UTP20 | 0.58 | 1.76 | -1.18 | 0.007031 |
| RPL4 | 4.22 | 5.16 | -0.94 | 0.007043 |
| RP11-380G5.3 | 4.96 | 4 | 0.96 | 0.007054 |
| IFFO2 | 1.39 | 2.57 | -1.18 | 0.007062 |
| LINC01260 | -1.89 | 0.12 | -2.01 | 0.007078 |
| RP11-212D19.4 | -2.95 | -1.12 | -1.83 | 0.007066 |
| BPI | 1.33 | -1.09 | 2.42 | 0.007087 |
| CPEB2 | 1.6 | 0.72 | 0.88 | 0.007103 |
| NRGN | 4.5 | 5.95 | -1.44 | 0.007117 |
| TTC27 | 1.38 | 2.37 | -0.99 | 0.007129 |
| AGMAT | -0.72 | 0.7 | -1.41 | 0.007161 |
| C19orf38 | 4.96 | 4.21 | 0.75 | 0.00715 |
| ZC3H7B | 1.72 | 2.6 | -0.88 | 0.007202 |
| CTTN | -0.64 | 1.04 | -1.68 | 0.007204 |
| KLF12 | 2.97 | 4.08 | -1.11 | 0.007254 |
| CDC42EP1 | -2.36 | -0.41 | -1.95 | 0.00722 |
| IGKV3-11 | 2.81 | 4.2 | -1.39 | 0.007241 |
| RP11-223C24.1 | 1.18 | 2.19 | -1.02 | 0.00724 |
| TMCO3 | 2.59 | 1.71 | 0.87 | 0.007272 |
| SLC16A1 | -0.82 | 0.43 | -1.25 | 0.007265 |
| SLC25A39 | 4.39 | 5.53 | -1.14 | 0.00721 |
| OVGP1 | -1.22 | 0.03 | -1.25 | 0.00726 |
| EMG1 | 0.9 | 1.88 | -0.99 | 0.007246 |
| SNAI3 | 3.45 | 2.72 | 0.73 | 0.007262 |
| GPSM1 | -2.75 | -1 | -1.76 | 0.007241 |
| ALCAM | 2.24 | 1.37 | 0.87 | 0.007235 |
| TNFAIP8L1 | 0.08 | 1.1 | -1.02 | 0.00723 |
| TRAP1 | 0.76 | 1.72 | -0.96 | 0.007208 |
| RANBP10 | 1.96 | 2.98 | -1.01 | 0.007237 |
| FAM212A | -1.12 | 0.71 | -1.83 | 0.007235 |
| MYL9 | 1.11 | 3.07 | -1.96 | 0.007281 |
| PDK2 | -0.58 | 0.94 | -1.52 | 0.007286 |
| DDX21 | 2.83 | 3.73 | -0.89 | 0.007311 |
| WIPI1 | 2.77 | 1.8 | 0.97 | 0.007302 |
| RP11-54H7.4 | -1.49 | -4.48 | 3 | 0.007315 |
| EIF2AK3 | 1.32 | 2.3 | -0.98 | 0.007326 |
| NAA15 | 1.31 | 2.35 | -1.04 | 0.007345 |
| ITGB3 | 3.53 | 5.07 | -1.54 | 0.007374 |
| DDIT4 | 3.59 | 2.35 | 1.24 | 0.007391 |
| MYC | -2.03 | -0.01 | -2.02 | 0.007389 |
| CARM1 | 1.36 | 2.38 | -1.02 | 0.007364 |
| TMEM120A | 2.14 | 1.17 | 0.97 | 0.00738 |
| LIPA | 2.73 | 3.72 | -0.99 | 0.007393 |
| GOSR2 | 1.72 | 2.67 | -0.95 | 0.007386 |
| NUFIP1 | -0.2 | 0.89 | -1.08 | 0.007417 |
| RP11-228B15.4 | -0.01 | 1.25 | -1.26 | 0.007436 |
| TCL6 | -1.53 | 0.05 | -1.57 | 0.007437 |
| MLLT6 | 3.09 | 3.96 | -0.87 | 0.007453 |
| EIF3L | 3.81 | 4.61 | -0.8 | 0.007425 |
| UHRF1BP1 | 1.27 | 2.25 | -0.99 | 0.007452 |
| GATA2 | 0.1 | 1.76 | -1.66 | 0.007471 |
| PPIE | 0.34 | 1.46 | -1.12 | 0.007504 |
| EIF4BP6 | 2.8 | 3.67 | -0.87 | 0.007498 |
| CLCF1 | -0.14 | 1.28 | -1.42 | 0.007496 |
| ASAP2 | -1.16 | 0.44 | -1.59 | 0.007482 |
| MRS2 | 0.78 | 1.8 | -1.02 | 0.007532 |
| RASGRP1 | 2.59 | 3.61 | -1.01 | 0.00752 |
| KB-1396H2.2 | 0.44 | 1.75 | -1.31 | 0.007626 |
| CLDN5 | -4.02 | -1.35 | -2.68 | 0.007564 |
| MYBPC3 | 1.4 | 0.25 | 1.15 | 0.007607 |
| RFESD | -2.86 | -1.17 | -1.69 | 0.007598 |
| ELK4 | 3.23 | 4.15 | -0.91 | 0.00763 |
| LINC01355 | 0.97 | 2.22 | -1.26 | 0.007555 |
| TANC2 | 1.78 | 0.86 | 0.92 | 0.007613 |
| C6orf203 | -0.04 | 1.05 | -1.08 | 0.007602 |
| YWHAQ | 3.9 | 4.73 | -0.83 | 0.007579 |
| RP11-326A19.5 | 0.88 | -1.35 | 2.22 | 0.007568 |
| RPL19 | 5.26 | 6.1 | -0.83 | 0.007573 |
| SND1 | 2.77 | 3.66 | -0.89 | 0.00761 |
| SNHG4 | -2.04 | -0.41 | -1.63 | 0.007609 |
| SYTL4 | -2.93 | -1.06 | -1.86 | 0.007658 |
| RN7SL172P | 4.82 | 3.82 | 0.99 | 0.007655 |
| KMT2A | 2.21 | 3.29 | -1.08 | 0.00766 |
| TRAV38-1 | -0.38 | 1.21 | -1.59 | 0.007662 |
| TRIB3 | -1.58 | 0.27 | -1.85 | 0.007688 |
| PIGC | 1.27 | 2.34 | -1.07 | 0.007679 |
| GALNT12 | -0.97 | 0.39 | -1.37 | 0.007696 |
| SOX13 | -1.95 | -0.3 | -1.64 | 0.007706 |
| LSG1 | 1.64 | 2.69 | -1.04 | 0.00772 |
| RP11-21A7A.3 | -1.75 | -0.16 | -1.59 | 0.007731 |
| DGKE | 0.02 | 1.27 | -1.25 | 0.007731 |
| SPARC | 2.52 | 4.02 | -1.5 | 0.007743 |
| RP11-44F14.9 | 4.5 | 3.5 | 1 | 0.007754 |
| AP2B1 | 3.41 | 4.31 | -0.9 | 0.00776 |
| ZNF614 | -0.01 | 1.43 | -1.43 | 0.007765 |
| LIN52 | -0.23 | 0.87 | -1.1 | 0.007778 |
| THEM5 | -2.43 | -0.27 | -2.17 | 0.007799 |
| MOSPD2 | 4.78 | 4.05 | 0.73 | 0.007805 |
| RP4-733B9.1 | -0.35 | 1.49 | -1.84 | 0.007806 |
| IQCH-AS1 | -1.6 | -0.01 | -1.58 | 0.00787 |
| PPP4R1L | 2.14 | 1.28 | 0.86 | 0.007878 |
| PLEKHG2 | -0.73 | 0.48 | -1.21 | 0.007905 |
| IGHG3 | 1.58 | 3.06 | -1.48 | 0.007896 |
| MAGED1 | -0.34 | 0.88 | -1.21 | 0.007903 |
| POLR3D | 0.61 | 1.68 | -1.07 | 0.007826 |
| RBM19 | 1.88 | 2.84 | -0.96 | 0.007852 |
| RNASET2 | 5.37 | 4.55 | 0.82 | 0.007891 |
| RP11-332O19.2 | 4.9 | 4.08 | 0.82 | 0.007852 |
| TRIM25 | 5.52 | 4.67 | 0.84 | 0.007898 |
| COMMD7 | 1.27 | 2.17 | -0.89 | 0.00789 |
| ITGAM | 5.87 | 5.11 | 0.76 | 0.007898 |
| TCN1 | 2.37 | 1.33 | 1.04 | 0.007848 |
| TRBV1 | -1.26 | 0.33 | -1.59 | 0.007854 |
| ALDH18A1 | 0.56 | 1.8 | -1.24 | 0.007839 |
| IGIP | 1.57 | 2.55 | -0.98 | 0.007921 |
| SORT1 | 3.45 | 2.66 | 0.79 | 0.007931 |
| FOLR3 | 2.8 | 1.02 | 1.78 | 0.007922 |
| ZNF382 | -3.86 | -1.53 | -2.33 | 0.007958 |
| RP11-690D19.3 | -0.75 | 0.6 | -1.35 | 0.007943 |
| RBFA | -0.61 | 0.61 | -1.22 | 0.007957 |
| BTNL8 | 3.06 | 2.11 | 0.95 | 0.007989 |
| LRFN1 | 3.05 | 2.2 | 0.85 | 0.00802 |
| UPK3BL | 4.16 | 2.43 | 1.73 | 0.008051 |
| SLC25A23 | -1.82 | -0.44 | -1.38 | 0.008055 |
| EIF2S3 | 5.04 | 5.77 | -0.74 | 0.008043 |
| TSPAN33 | 1.33 | 2.37 | -1.04 | 0.007982 |
| STON2 | -0.78 | 0.56 | -1.34 | 0.00803 |
| COL9A2 | 1.54 | 0.28 | 1.26 | 0.008005 |
| ZXDA | 0.29 | 1.39 | -1.09 | 0.007999 |
| AK5 | -1.07 | 0.26 | -1.34 | 0.008011 |
| POFUT1 | 1.07 | 2.01 | -0.93 | 0.008046 |
| QSOX1 | 2.84 | 1.9 | 0.94 | 0.008015 |
| TMIE | -3.01 | -0.27 | -2.74 | 0.008042 |
| SLC9A8 | 3.57 | 2.74 | 0.84 | 0.00801 |
| PRKCQ-AS1 | 0.49 | 1.7 | -1.21 | 0.008005 |
| TTC39C | 1.86 | 2.97 | -1.11 | 0.008075 |
| C1RL | 4.04 | 3.14 | 0.89 | 0.008083 |
| ZNF275 | 0.15 | 1.36 | -1.21 | 0.008085 |
| CTD-2006K23.1 | -1.01 | 0.47 | -1.48 | 0.008106 |
| MT-CO1 | 9.78 | 11.12 | -1.34 | 0.008116 |
| EIF3FP3 | 3.39 | 4.33 | -0.95 | 0.008118 |
| RPL23A | 1.81 | 2.73 | -0.92 | 0.008142 |
| SMYD5 | 0 | 1.14 | -1.14 | 0.008221 |
| GOLGA2P10 | -1.82 | -0.04 | -1.78 | 0.008271 |
| SMC1A | 2.74 | 3.68 | -0.95 | 0.008178 |
| ZBTB40 | 1.88 | 2.72 | -0.84 | 0.008203 |
| RPL8 | 3.64 | 4.41 | -0.77 | 0.008268 |
| ATP8A2 | -3.54 | -1.68 | -1.86 | 0.008202 |
| IL18RAP | 5.4 | 3.5 | 1.89 | 0.008197 |
| CH17-472G23.4 | 1.03 | 2.16 | -1.12 | 0.008198 |
| IGKV1-16 | 1.18 | 2.46 | -1.28 | 0.0082 |
| AK1 | 0.49 | 2.16 | -1.66 | 0.008228 |
| RP11-35G9.5 | 0.63 | 1.6 | -0.97 | 0.008239 |
| NLE1 | -0.74 | 0.41 | -1.15 | 0.00821 |
| ST20 | 4.69 | 3.9 | 0.79 | 0.008283 |
| ZNF853 | -1.48 | 0.21 | -1.69 | 0.008248 |
| AC135048.13 | 0.63 | -0.84 | 1.46 | 0.008277 |
| SHTN1 | 0.38 | 1.38 | -1.01 | 0.008256 |
| SLC11A1 | 4.57 | 3.25 | 1.32 | 0.008247 |
| CUL4A | 2.11 | 2.93 | -0.82 | 0.008226 |
| DNAH6 | -3.78 | -1.81 | -1.98 | 0.00824 |
| RP11-139H15.7 | 3.47 | 2.59 | 0.89 | 0.008275 |
| HNRNPA1P70 | 0.02 | 1.63 | -1.62 | 0.008207 |
| RP4-576H24.2 | 2.32 | 1.28 | 1.04 | 0.008178 |
| SLC7A1 | 0.96 | 2.12 | -1.17 | 0.008157 |
| ZC3H12D | 0.85 | 1.75 | -0.9 | 0.008321 |
| RN7SL124P | 3.23 | 1.15 | 2.08 | 0.008318 |
| CYP4F22 | -3.24 | -1.31 | -1.92 | 0.008308 |
| LAPTM4B | -2.25 | -0.55 | -1.7 | 0.008302 |
| SCAI | 0.3 | 1.42 | -1.12 | 0.008293 |
| PLEKHB1 | -1.28 | 0.24 | -1.52 | 0.008473 |
| THAP9 | -2.44 | -0.72 | -1.72 | 0.008424 |
| IDH3A | -0.55 | 0.64 | -1.19 | 0.008368 |
| RP3-492J12.2 | 1.68 | 2.53 | -0.85 | 0.008456 |
| A2M-AS1 | 2.46 | 4.16 | -1.7 | 0.008449 |
| SWI5 | -0.68 | 0.49 | -1.18 | 0.008401 |
| RP4-575N6.5 | 1.45 | 2.48 | -1.03 | 0.008423 |
| SFRP2 | -1.57 | 0.39 | -1.96 | 0.008352 |
| UBFD1 | -1.06 | 0.37 | -1.43 | 0.008442 |
| ZMYND15 | 0.03 | -1.33 | 1.36 | 0.00838 |
| MYBBP1A | -0.16 | 0.99 | -1.14 | 0.008459 |
| ARL10 | 0 | 1.19 | -1.19 | 0.008343 |
| RP11-70L8.5 | -0.11 | 1.1 | -1.22 | 0.008397 |
| MAP4K5 | 1.5 | 2.37 | -0.87 | 0.008485 |
| LRRC58 | 2.34 | 3.23 | -0.88 | 0.008484 |
| CCT4 | 2.85 | 3.72 | -0.87 | 0.008506 |
| TRBV29-1 | 1.88 | 3.48 | -1.61 | 0.008489 |
| GPI | 1.47 | 2.29 | -0.82 | 0.008485 |
| TMX4 | 5.66 | 5.01 | 0.65 | 0.00846 |
| APH1B | 2.3 | 1.22 | 1.08 | 0.008495 |
| RPL28 | 3.4 | 4.24 | -0.84 | 0.008368 |
| HLA-DQA1 | 1.39 | 2.88 | -1.49 | 0.00839 |
| SOCS1 | 2.91 | 1.81 | 1.09 | 0.00842 |
| DMWD | -0.23 | 1.11 | -1.34 | 0.008394 |
| ZNF827 | -0.26 | 1.06 | -1.32 | 0.008426 |
| PRH1-PRR4 | -1.34 | 0.07 | -1.41 | 0.008498 |
| KEL | -1.29 | 0.18 | -1.47 | 0.008407 |
| CTD-3138B18.5 | -0.14 | 1.17 | -1.31 | 0.008377 |
| E2F3 | 3.19 | 1.82 | 1.36 | 0.008458 |
| SMN2 | -2.12 | -0.64 | -1.48 | 0.008518 |
| CASD1 | 1.34 | 2.4 | -1.06 | 0.008565 |
| ALS2CR12 | 0.62 | 1.62 | -1 | 0.00858 |
| RP11-461L13.5 | 0.5 | -0.9 | 1.41 | 0.008563 |
| CTD-3022L24.1 | 0.12 | 1.38 | -1.26 | 0.008572 |
| HLA-DPB1 | 3.46 | 4.59 | -1.13 | 0.00854 |
| AMOT | -2.3 | -0.66 | -1.64 | 0.008562 |
| PAWR | -1.51 | -0.06 | -1.45 | 0.008553 |
| EIF3C | 2.34 | 3.23 | -0.89 | 0.008702 |
| RP11-381K20.2 | -0.89 | 0.41 | -1.3 | 0.008704 |
| RSL1D1 | 1.68 | 2.59 | -0.91 | 0.00863 |
| USP14 | 1.3 | 2.3 | -1 | 0.008625 |
| TAS2R12 | -0.68 | 1.46 | -2.14 | 0.008634 |
| PPBP | 6.47 | 8.19 | -1.72 | 0.008684 |
| AAR2 | 1.63 | 2.55 | -0.92 | 0.008685 |
| RTFDC1 | 4.25 | 3.62 | 0.63 | 0.008703 |
| IL11RA | 1.05 | 1.98 | -0.93 | 0.008659 |
| RP11-181C21.4 | 3.27 | 4.05 | -0.78 | 0.0087 |
| SMN1 | -1.67 | -0.33 | -1.34 | 0.008678 |
| IGHD | 2.84 | 4.07 | -1.23 | 0.008695 |
| SQLE | -0.84 | 0.43 | -1.27 | 0.008657 |
| ABCF1 | 1.32 | 2.23 | -0.91 | 0.008681 |
| MAP9 | -1.58 | 0.01 | -1.59 | 0.008687 |
| USP15 | 5.38 | 4.72 | 0.66 | 0.008713 |
| POC1B | 1.33 | 2.18 | -0.85 | 0.008717 |
| RRP9 | 0.28 | 1.89 | -1.62 | 0.008759 |
| CD200R1 | 0.06 | 1.18 | -1.12 | 0.008749 |
| RASGRF2 | 0.53 | 1.77 | -1.23 | 0.008762 |
| LILRB2 | 5.23 | 4.5 | 0.73 | 0.008737 |
| AP003068.23 | 0.59 | 2.72 | -2.13 | 0.008751 |
| SKAP1 | 2.09 | 3.16 | -1.07 | 0.008779 |
| KIAA0232 | 4.66 | 3.96 | 0.7 | 0.008804 |
| MRPL3 | 1.13 | 2.07 | -0.93 | 0.008798 |
| RP11-274A11.4 | 3.67 | 2.91 | 0.76 | 0.008933 |
| SRC | -0.19 | 1.03 | -1.21 | 0.008927 |
| SLC36A4 | 2.03 | 1.2 | 0.83 | 0.008869 |
| ARHGAP9 | 4.49 | 3.77 | 0.72 | 0.008949 |
| PVT1 | -0.82 | 0.51 | -1.33 | 0.008911 |
| GPX7 | 0.44 | 1.55 | -1.11 | 0.008854 |
| GCSAM | -0.11 | 1.15 | -1.26 | 0.008894 |
| GOLGA7B | -1.99 | -0.4 | -1.59 | 0.008924 |
| IL18 | 1.08 | -0.02 | 1.1 | 0.008918 |
| BTBD6P1 | 0.57 | 2.07 | -1.5 | 0.008859 |
| RP11-402J7.2 | 1.48 | 2.79 | -1.31 | 0.008946 |
| LSMEM1 | 1.18 | 0 | 1.18 | 0.008916 |
| HSPA9 | 2.66 | 3.55 | -0.89 | 0.008891 |
| PILRA | 5.8 | 5.04 | 0.76 | 0.008917 |
| SUMO1P1 | 3.31 | 1.51 | 1.8 | 0.008952 |
| UBA52 | 4.58 | 5.44 | -0.87 | 0.0089 |
| KIAA0319L | 3.73 | 2.84 | 0.89 | 0.008946 |
| CLOCK | -0.07 | 1.15 | -1.23 | 0.008891 |
| TRMT11 | 0.19 | 1.29 | -1.1 | 0.008964 |
| CDK4 | -0.67 | 0.57 | -1.24 | 0.00904 |
| FAM53C | 3.94 | 2.87 | 1.08 | 0.009024 |
| B4GALT3 | 0.92 | 1.89 | -0.97 | 0.009016 |
| WDFY3 | 5.06 | 4.26 | 0.8 | 0.009021 |
| GPR63 | -4.12 | -1.82 | -2.3 | 0.00904 |
| NUCKS1 | 3.2 | 4.15 | -0.95 | 0.009065 |
| RP11-269G24.7 | 2.18 | 0.64 | 1.54 | 0.009052 |
| ATXN7 | 3.29 | 2.48 | 0.81 | 0.009068 |
| GOLGA8A | 1.52 | 2.52 | -1.01 | 0.009083 |
| MCM3 | 1.67 | 2.59 | -0.92 | 0.009108 |
| ITPR3 | 1.7 | 2.79 | -1.09 | 0.009089 |
| PSTPIP2 | 4.25 | 3.19 | 1.06 | 0.009096 |
| MFSD2B | -0.86 | 0.76 | -1.62 | 0.009113 |
| FAM223B | 0.04 | -1.22 | 1.26 | 0.009104 |
| ANO6 | 2.5 | 3.46 | -0.96 | 0.009144 |
| PTPRS | -1.36 | -0.03 | -1.33 | 0.00914 |
| LACTB2 | 0.49 | 1.53 | -1.04 | 0.009164 |
| TMEM209 | 1.34 | 2.29 | -0.95 | 0.009168 |
| ARL4AP2 | 0.69 | -0.98 | 1.66 | 0.009188 |
| PLAGL1 | 1.1 | 0.1 | 1 | 0.009202 |
| SEMA7A | -0.33 | 0.75 | -1.08 | 0.009204 |
| MYLK | -2.22 | -0.49 | -1.73 | 0.009236 |
| RP4-673D20.5 | -0.72 | 0.75 | -1.47 | 0.009249 |
| METTL14 | 1.98 | 0.99 | 0.99 | 0.009239 |
| DFFA | 1.2 | 2.11 | -0.9 | 0.009248 |
| IRAK2 | 0.8 | 1.76 | -0.96 | 0.009237 |
| AC008850.3 | 1.37 | 2.34 | -0.97 | 0.009298 |
| CROCC | 0.2 | 1.6 | -1.39 | 0.009325 |
| RP11-181C3.1 | -2.39 | -0.82 | -1.57 | 0.009307 |
| ARFGEF2 | 2.35 | 3.27 | -0.92 | 0.009332 |
| KCNQ5-IT1 | -1.05 | 0.35 | -1.4 | 0.009309 |
| IARS | 1.65 | 2.63 | -0.98 | 0.009307 |
| CACNA1C-AS1 | -1.31 | -0.06 | -1.25 | 0.00933 |
| DUSP8 | -2.89 | -1.16 | -1.73 | 0.00938 |
| TAL1 | -0.17 | 1.2 | -1.37 | 0.009379 |
| SNURF | 1.71 | 2.72 | -1.01 | 0.009367 |
| PIEZO1 | 2.08 | 3.2 | -1.12 | 0.00936 |
| SERPINI1 | -1.19 | 0.13 | -1.32 | 0.009371 |
| PM20D1 | -3.92 | -1.7 | -2.22 | 0.009355 |
| RHOBTB2 | -0.52 | 0.84 | -1.37 | 0.009399 |
| PGRMC1 | 2.23 | 3.54 | -1.31 | 0.009401 |
| RP11-44F14.1 | 3.97 | 3.03 | 0.94 | 0.009446 |
| IGHV4-39 | 2.42 | 3.68 | -1.26 | 0.009453 |
| SLC16A13 | 0.24 | 1.19 | -0.96 | 0.009457 |
| DNAJC10 | 0.96 | 1.89 | -0.93 | 0.009429 |
| TRAPPC3L | -3.06 | -0.58 | -2.47 | 0.009413 |
| DCK | 3.14 | 3.96 | -0.83 | 0.009463 |
| PREX1 | 7.61 | 6.84 | 0.77 | 0.009433 |
| C5orf30 | 1.11 | -0.27 | 1.38 | 0.009453 |
| LSR | -1.53 | -0.13 | -1.39 | 0.009464 |
| EIF4BP7 | 4.28 | 4.99 | -0.71 | 0.009488 |
| RP5-968J1.1 | 2.63 | 1.65 | 0.98 | 0.00952 |
| RP11-394I13.2 | 2.59 | 1.46 | 1.13 | 0.00952 |
| RP11-326C3.13 | 0.28 | -1.4 | 1.67 | 0.009513 |
| TLR8-AS1 | -1.07 | -2.92 | 1.85 | 0.009525 |
| TRAF5 | 1.35 | 2.38 | -1.03 | 0.009551 |
| CXXC5 | -0.65 | 0.66 | -1.31 | 0.009538 |
| PARM1 | -3.29 | -0.86 | -2.43 | 0.00954 |
| DOCK5 | 5.86 | 5.12 | 0.75 | 0.009557 |
| RMDN3 | -0.53 | 0.66 | -1.19 | 0.009584 |
| DCAF4 | -1.34 | -0.12 | -1.22 | 0.009655 |
| SMAP2 | 8.18 | 7.17 | 1.02 | 0.009593 |
| ANKRD40 | 2.03 | 2.92 | -0.89 | 0.009589 |
| FRAT1 | 5.05 | 4.21 | 0.84 | 0.00963 |
| PDZD8 | 3.89 | 3.21 | 0.68 | 0.009638 |
| TLR7 | 1.21 | 2.34 | -1.13 | 0.00961 |
| TSC22D3 | 5.25 | 4.36 | 0.89 | 0.009658 |
| ELF2 | 3.44 | 2.77 | 0.67 | 0.009615 |
| VPS37B | 4.03 | 3.41 | 0.63 | 0.009654 |
| RP11-345J18.2 | 0.03 | 1.53 | -1.5 | 0.009575 |
| SPACA6 | 0.14 | -1.3 | 1.44 | 0.009642 |
| SMAD3 | 1.83 | 2.8 | -0.97 | 0.009643 |
| SAT1 | 5.62 | 4.76 | 0.86 | 0.009597 |
| AC106801.1 | -0.02 | -1.99 | 1.97 | 0.009633 |
| SEMA4F | -1.86 | -0.38 | -1.47 | 0.009671 |
| CSNK1G2P1 | 2.26 | 1.16 | 1.11 | 0.009693 |
| APAF1 | 4.36 | 3.58 | 0.77 | 0.00968 |
| SYCP2L | -3.72 | -0.63 | -3.09 | 0.009687 |
| RP11-477N3.1 | -0.76 | 0.94 | -1.7 | 0.009703 |
| RP3-514P16.1 | -3.58 | -1.36 | -2.23 | 0.009725 |
| C7orf25 | 1.43 | 0.17 | 1.26 | 0.009746 |
| CLCN4 | 2.44 | 1.38 | 1.06 | 0.009743 |
| SLC39A8 | 0.31 | 1.39 | -1.08 | 0.00972 |
| DUSP6 | 3.46 | 4.14 | -0.68 | 0.009755 |
| SIRPB1 | 4.56 | 3.91 | 0.65 | 0.00974 |
| RP13-487P22.1 | 0.16 | 1.38 | -1.21 | 0.009805 |
| FAM49B | 4.34 | 3.7 | 0.64 | 0.009786 |
| VMP1 | 5.94 | 5.26 | 0.68 | 0.009814 |
| FSTL1 | -2.63 | -0.07 | -2.56 | 0.009817 |
| RHBDD1 | 0.9 | 1.77 | -0.88 | 0.009806 |
| ZFYVE9 | -1.02 | 0.25 | -1.26 | 0.009811 |
| CTD-2306A12.1 | 0.84 | -1.17 | 2 | 0.009778 |
| RNMTL1 | 0.33 | 1.38 | -1.06 | 0.00984 |
| TRGC2 | 2.88 | 4.48 | -1.6 | 0.009838 |
| U73166.2 | 1.6 | 0.49 | 1.12 | 0.009854 |
| LINC00342 | 1.49 | 2.44 | -0.96 | 0.009862 |
| HCG27 | 5.82 | 4.7 | 1.12 | 0.009865 |
| MYCT1 | -1.83 | -0.44 | -1.39 | 0.009896 |
| PCBP2P1 | -1.24 | 0.25 | -1.5 | 0.009897 |
| FCRL3 | 1.05 | 2.51 | -1.46 | 0.009893 |
| ALOX12P1 | -0.41 | -1.82 | 1.4 | 0.009921 |
| FBXO31 | 0.13 | 1.29 | -1.16 | 0.009968 |
| SFMBT2 | 1.59 | 2.51 | -0.92 | 0.009962 |
| RP11-677M14.2 | -1.04 | 0.2 | -1.24 | 0.009991 |
| RARG | -1.14 | 0.15 | -1.29 | 0.009989 |
| PRKACB | 2.42 | 3.49 | -1.07 | 0.009992 |
| IGKV3-20 | 3.36 | 4.46 | -1.1 | 0.01001 |
| NIPA1 | -0.89 | 0.35 | -1.24 | 0.01002 |
| ADAMTS6 | -3.18 | -1.44 | -1.74 | 0.01007 |
| PROS1 | -1.08 | 0.45 | -1.53 | 0.01007 |
| MSL1 | 4.91 | 4.19 | 0.73 | 0.01006 |
| MIR4697HG | -0.81 | 0.63 | -1.45 | 0.01006 |
| RP11-371A22.1 | 6.73 | 7.54 | -0.81 | 0.01008 |
| PTPRO | -1.64 | -0.3 | -1.34 | 0.01011 |
| AKIRIN2 | 5.76 | 5.11 | 0.66 | 0.01011 |
| RP11-50I19.2 | 4.62 | 4.01 | 0.61 | 0.01012 |
| PARP1 | 2.38 | 3.42 | -1.04 | 0.01011 |
| COA3 | 0.71 | 1.71 | -1 | 0.01013 |
| SLC25A29 | -0.72 | 0.46 | -1.18 | 0.01016 |
| HNRNPA1 | 1.82 | 2.67 | -0.85 | 0.01015 |
| CKAP5 | 1.46 | 2.47 | -1.01 | 0.01019 |
| AC144831.3 | 3.58 | 2.52 | 1.07 | 0.01017 |
| TRGV10 | 0.93 | 4.02 | -3.09 | 0.01018 |
| ANKRD6 | -0.45 | -2.06 | 1.62 | 0.0102 |
| CTD-2207O23.3 | 2.2 | 3.13 | -0.93 | 0.01019 |
| RN7SL269P | -1.17 | 0.58 | -1.74 | 0.01027 |
| TTC3 | 1.81 | 2.73 | -0.93 | 0.01025 |
| SLC12A7 | 2.43 | 3.65 | -1.22 | 0.01026 |
| IL17RA | 5.86 | 5.13 | 0.73 | 0.01026 |
| INADL | 0.88 | 1.92 | -1.05 | 0.01026 |
| KRT8P39 | 0.15 | 1.09 | -0.94 | 0.01026 |
| PIP4K2B | 2.87 | 3.63 | -0.76 | 0.01024 |
| LRRFIP1P1 | 0.55 | -1.38 | 1.93 | 0.01023 |
| LINC01550 | 0.75 | 1.84 | -1.1 | 0.01021 |
| TNF | 1.35 | 2.49 | -1.15 | 0.01025 |
| C7orf34 | -0.35 | -2.37 | 2.02 | 0.01028 |
| MIR646HG | 1.26 | 0.33 | 0.92 | 0.01029 |
| TLE2 | -2.48 | -0.83 | -1.65 | 0.01035 |
| RP5-1112D6.8 | 0.02 | 1.33 | -1.31 | 0.01039 |
| C1orf145 | -2.91 | -1.15 | -1.76 | 0.01046 |
| MTSS1 | 1.06 | 2.09 | -1.03 | 0.01034 |
| RPS12P27 | 2.43 | 3.28 | -0.86 | 0.01032 |
| ZNF280B | -3.19 | -1.44 | -1.75 | 0.01048 |
| KIAA1143 | 2.29 | 3.07 | -0.78 | 0.01048 |
| PHF10 | 2.42 | 3.33 | -0.91 | 0.01035 |
| KCNH8 | -2.6 | -0.94 | -1.65 | 0.01043 |
| LPXN | 3.61 | 4.42 | -0.81 | 0.01047 |
| ST6GALNAC2 | 2.99 | 2.07 | 0.92 | 0.01034 |
| EIF2AK1 | 4.05 | 4.83 | -0.78 | 0.01038 |
| TRAF2 | 0.93 | 1.84 | -0.91 | 0.01042 |
| VARS | 0.13 | 1.23 | -1.1 | 0.01039 |
| RP11-651L5.2 | 1.38 | 0.19 | 1.19 | 0.01048 |
| RAP2A | 1.95 | 2.92 | -0.97 | 0.01036 |
| MFAP3L | 0.16 | 1.48 | -1.32 | 0.01045 |
| WRN | 1.25 | 2.13 | -0.88 | 0.01038 |
| RP11-218F10.3 | 0.23 | 1.9 | -1.68 | 0.01042 |
| MZB1 | -1.35 | -0.09 | -1.27 | 0.01043 |
| TUBB | 4.52 | 5.31 | -0.79 | 0.01036 |
| PARS2 | -0.49 | 0.81 | -1.3 | 0.01044 |
| BNIP3 | -0.16 | 0.97 | -1.13 | 0.01037 |
| RP11-385D13.3 | 1.22 | 2.31 | -1.09 | 0.01034 |
| LPGAT1 | 5.59 | 4.86 | 0.73 | 0.01042 |
| HIP1R | 0.61 | 1.63 | -1.02 | 0.01048 |
| SLC2A1 | 1.74 | 2.84 | -1.1 | 0.0104 |
| XBP1 | 2.01 | 2.89 | -0.87 | 0.01035 |
| EEFSEC | 0.88 | 1.78 | -0.9 | 0.01059 |
| ANGEL1 | 0.8 | 1.76 | -0.96 | 0.01063 |
| HNRNPA1P48 | 3.44 | 4.35 | -0.91 | 0.01059 |
| MCC | -3.62 | -1.53 | -2.09 | 0.01054 |
| PATZ1 | 1.46 | 2.31 | -0.85 | 0.0106 |
| PP7080 | -0.3 | 0.88 | -1.18 | 0.0106 |
| TP53INP2 | 3.33 | 2.31 | 1.02 | 0.01062 |
| SLC35F6 | 0.84 | 1.78 | -0.94 | 0.01062 |
| FBXL14 | 1.06 | 2.16 | -1.09 | 0.01062 |
| ARHGEF12 | 0.99 | 2.06 | -1.07 | 0.01057 |
| CD4 | 3.03 | 3.97 | -0.94 | 0.01053 |
| MAPKAPK2 | 4.87 | 4.26 | 0.61 | 0.01057 |
| GYPC | 4.84 | 5.97 | -1.13 | 0.01057 |
| LINC00843 | 0.68 | 1.77 | -1.09 | 0.01059 |
| TRAV35 | -0.42 | 1.84 | -2.26 | 0.01054 |
| SOD1 | 2.36 | 3.17 | -0.81 | 0.0106 |
| FUT8 | 0.18 | 1.29 | -1.12 | 0.0106 |
| SLAMF7 | 1.97 | 3.09 | -1.12 | 0.01062 |
| MPRIP | 2.28 | 3.16 | -0.88 | 0.01064 |
| RP11-710M11.1 | -0.67 | -2.24 | 1.58 | 0.01068 |
| ARID3A | 3.62 | 2.89 | 0.73 | 0.01074 |
| PDLIM7 | 3.95 | 3.1 | 0.84 | 0.01073 |
| MRPS30 | 1.91 | 2.87 | -0.95 | 0.01083 |
| CHAMP1 | 1.9 | 2.68 | -0.77 | 0.01087 |
| RP11-368N21.5 | -0.95 | 0.99 | -1.94 | 0.01084 |
| RHOC | -1.08 | 0.28 | -1.36 | 0.01076 |
| AF129075.5 | 1.06 | 1.86 | -0.8 | 0.01074 |
| TRAV8-6 | 0.5 | 1.58 | -1.08 | 0.01087 |
| MLLT3 | 0.08 | 1.14 | -1.06 | 0.01083 |
| WNT10B | -3 | -1.01 | -1.99 | 0.01077 |
| KRT17P8 | 2.02 | 3.75 | -1.73 | 0.01076 |
| GUSBP11 | 2.88 | 2.08 | 0.79 | 0.01079 |
| RP11-706O15.1 | 0.05 | 1.68 | -1.63 | 0.01086 |
| CTD-2012K14.6 | -0.97 | 0.33 | -1.3 | 0.01088 |
| LPAL2 | -1.36 | 0.24 | -1.6 | 0.01082 |
| TRUB2 | -0.45 | 0.8 | -1.25 | 0.01082 |
| NBPF8 | 1.64 | 2.49 | -0.85 | 0.01076 |
| AP003419.16 | 0.83 | 1.88 | -1.05 | 0.01085 |
| WDR36 | 1.07 | 2.04 | -0.97 | 0.01072 |
| SETP6 | 1.14 | -0.07 | 1.21 | 0.01078 |
| GOLGA6L9 | -2.33 | -0.8 | -1.53 | 0.01086 |
| CPQ | 4.7 | 3.99 | 0.71 | 0.01087 |
| RP4-730K3.3 | 2.42 | 1.48 | 0.94 | 0.0107 |
| SLC25A32 | 1.27 | 2.34 | -1.07 | 0.01077 |
| RP5-1142A6.10 | -1.67 | -0.34 | -1.33 | 0.01086 |
| EXTL3 | 3.04 | 1.52 | 1.52 | 0.01084 |
| PACSIN1 | -3.74 | -1.54 | -2.2 | 0.01083 |
| NOC4L | 0.09 | 1.15 | -1.06 | 0.01083 |
| TREM1 | 5.88 | 4.87 | 1.01 | 0.01089 |
| KIF5C | -1.35 | 0.38 | -1.73 | 0.01092 |
| BHLHE41 | -2.19 | -0.57 | -1.63 | 0.01091 |
| RP4-559A3.7 | -2 | -0.59 | -1.41 | 0.01091 |
| MAK16 | 1.01 | 2.03 | -1.02 | 0.01093 |
| KIF1B | 2.71 | 1.84 | 0.87 | 0.01096 |
| FANCF | 1.16 | 2.23 | -1.07 | 0.01095 |
| HIBADH | 0.36 | 1.28 | -0.92 | 0.01096 |
| GTPBP1 | 3.69 | 2.9 | 0.79 | 0.01097 |
| RP5-890E16.5 | 0.92 | -0.18 | 1.1 | 0.01102 |
| APEX1 | -0.36 | 0.7 | -1.06 | 0.01102 |
| BCL11A | -0.32 | 0.8 | -1.11 | 0.01103 |
| LINC00402 | 1.96 | 2.95 | -0.99 | 0.01102 |
| FAM69B | -3.88 | -0.52 | -3.36 | 0.01103 |
| KIAA1551 | 6.76 | 6.04 | 0.72 | 0.01106 |
| ZNF260 | -0.18 | 0.96 | -1.14 | 0.0111 |
| LIN7A | 4.31 | 3.51 | 0.8 | 0.01107 |
| ATN1 | 0.47 | 1.56 | -1.1 | 0.01107 |
| LCN2 | 2.04 | 0.58 | 1.45 | 0.01111 |
| RASA3 | 4.66 | 5.5 | -0.83 | 0.01111 |
| BHLHE40 | 3.09 | 3.9 | -0.81 | 0.0111 |
| XPNPEP1 | 0.95 | 1.83 | -0.88 | 0.0111 |
| PLCB2 | 4.73 | 4.12 | 0.62 | 0.01109 |
| IVNS1ABP | 4.88 | 4.15 | 0.73 | 0.01114 |
| EIF3I | 2.8 | 3.51 | -0.71 | 0.01114 |
| ABCA3 | -1.29 | -0.04 | -1.25 | 0.01116 |
| PRMT6 | 1.5 | 2.36 | -0.86 | 0.01118 |
| CYP4F35P | -2.35 | -0.56 | -1.79 | 0.01118 |
| ERCC2 | -0.85 | 0.4 | -1.26 | 0.01128 |
| LAMP2 | 6.24 | 5.56 | 0.68 | 0.01125 |
| MTPAP | 0.34 | 1.32 | -0.99 | 0.01134 |
| MGLL | -1.03 | 0.35 | -1.38 | 0.01132 |
| RP11-161M6.3 | -2.44 | 0.09 | -2.52 | 0.01127 |
| SEC14L1P1 | 0.72 | 1.74 | -1.02 | 0.01121 |
| ELL | 3.85 | 3.04 | 0.81 | 0.0113 |
| LAIR1 | 1.17 | 2.11 | -0.94 | 0.0113 |
| APOBEC3A | 7.11 | 6.1 | 1.01 | 0.0113 |
| LSS | -0.03 | 0.95 | -0.99 | 0.01133 |
| KIAA1919 | 2.04 | 2.93 | -0.89 | 0.01124 |
| GALNT6 | -0.73 | 0.39 | -1.12 | 0.01131 |
| KLKB1 | -4.41 | -2.09 | -2.32 | 0.01133 |
| DOCK10 | 3.26 | 4.32 | -1.06 | 0.01124 |
| ZNF296 | -0.87 | 0.27 | -1.14 | 0.01126 |
| FTO | -0.75 | 0.61 | -1.37 | 0.01126 |
| GIT1 | 0.8 | 1.64 | -0.84 | 0.0113 |
| ABHD14B | -0.76 | 0.49 | -1.25 | 0.01133 |
| METTL8 | -1.01 | 0.21 | -1.22 | 0.01128 |
| SCMH1 | -0.23 | 1.03 | -1.26 | 0.0113 |
| BCL2A1 | 5.73 | 4.14 | 1.59 | 0.01129 |
| EEF2KMT | -1.55 | -0.33 | -1.22 | 0.01141 |
| DAXX | 1.86 | 2.59 | -0.73 | 0.01137 |
| TBC1D32 | -0.54 | 0.72 | -1.25 | 0.0115 |
| RP11-138I1.2 | -0.71 | 0.52 | -1.23 | 0.01147 |
| RPL13 | 2.8 | 3.63 | -0.83 | 0.01147 |
| MAN2A2 | 3.29 | 2.24 | 1.05 | 0.0115 |
| GIPC3 | -2.69 | -0.52 | -2.17 | 0.01147 |
| CROCCP2 | 1.49 | 2.55 | -1.06 | 0.01145 |
| RP11-62E14.2 | 0 | 1.03 | -1.02 | 0.01145 |
| IGF2BP3 | -1.76 | -0.39 | -1.37 | 0.01151 |
| XXbac-BPG283O16.9 | 1.93 | 2.8 | -0.86 | 0.01148 |
| RP11-23J18.1 | 0.13 | 1.57 | -1.44 | 0.01149 |
| SIAH2 | 4 | 4.91 | -0.91 | 0.01137 |
| JAZF1 | 3.44 | 4.16 | -0.72 | 0.01137 |
| RP11-529K1.2 | -2.07 | -0.53 | -1.54 | 0.01141 |
| FAM229A | 1.58 | 2.32 | -0.74 | 0.01147 |
| CAPN15 | 1.4 | 2.36 | -0.96 | 0.01149 |
| RP11-498C9.4 | 0.32 | 1.8 | -1.47 | 0.0115 |
| C2orf88 | 0.1 | 2.19 | -2.08 | 0.01144 |
| QSOX2 | 1.08 | 1.94 | -0.85 | 0.0114 |
| NUP88 | 1.21 | 2.06 | -0.86 | 0.01151 |
| NGFRAP1 | -0.89 | 0.65 | -1.54 | 0.01147 |
| PDDC1 | -0.68 | 0.52 | -1.2 | 0.01135 |
| GNB5 | -0.3 | 0.76 | -1.06 | 0.01149 |
| ATP10A | 0.83 | 1.85 | -1.03 | 0.0115 |
| PABPC1 | 4.83 | 5.68 | -0.86 | 0.01138 |
| IL12RB2 | -0.34 | 0.95 | -1.29 | 0.01153 |
| PEBP1 | 2.94 | 3.9 | -0.97 | 0.01154 |
| RNPS1P1 | 2.71 | 3.5 | -0.79 | 0.01155 |
| RP11-53O19.3 | 1.13 | 2.3 | -1.17 | 0.01158 |
| PRKCQ | 3.44 | 4.34 | -0.9 | 0.01157 |
| CDKL1 | -0.38 | 0.69 | -1.07 | 0.01159 |
| DPY19L3 | 1.23 | 0.32 | 0.91 | 0.01157 |
| CTD-2081C10.7 | -1.04 | 0.33 | -1.37 | 0.01159 |
| ZSCAN16 | 3.51 | 2.75 | 0.76 | 0.01161 |
| SLC38A1 | 3.72 | 4.58 | -0.85 | 0.01162 |
| MFSD12 | 0.95 | 1.73 | -0.79 | 0.01163 |
| ZNF77 | -0.14 | 0.84 | -0.98 | 0.01166 |
| SLC36A1 | 2.63 | 1.5 | 1.13 | 0.01168 |
| U3 | 0.19 | 2.23 | -2.03 | 0.01172 |
| TRIM13 | 0.37 | 1.58 | -1.21 | 0.01176 |
| TULP4 | 0.77 | 1.94 | -1.17 | 0.01176 |
| ZFP30 | -1.33 | 0.02 | -1.35 | 0.01173 |
| AC034220.3 | -2.06 | -0.53 | -1.54 | 0.01177 |
| ACSL4 | 4.84 | 4.22 | 0.62 | 0.01175 |
| TIMM10B | -0.12 | 3.17 | -3.29 | 0.01172 |
| FAM171A1 | -1.45 | 0.05 | -1.5 | 0.01171 |
| IKZF2 | 0.19 | 1.95 | -1.76 | 0.01178 |
| PTGIR | -1.09 | 0.17 | -1.26 | 0.01175 |
| TRAV36DV7 | -0.25 | 1.7 | -1.95 | 0.01177 |
| PRR5 | 0.54 | 1.85 | -1.3 | 0.01175 |
| TRAF1 | 2.9 | 4.03 | -1.12 | 0.01177 |
| GCNT4 | 1.27 | 2.38 | -1.11 | 0.01183 |
| LIMS3L | 0.8 | 2.15 | -1.35 | 0.01182 |
| INPP5A | 3.35 | 2.72 | 0.63 | 0.01179 |
| RP11-713M15.2 | -0.61 | 0.77 | -1.38 | 0.01182 |
| ATP1A1 | 3.4 | 4.2 | -0.8 | 0.01181 |
| MANEA | 0.55 | 1.69 | -1.13 | 0.01181 |
| CTD-2117L12.3 | 1.45 | 0.34 | 1.11 | 0.01195 |
| G3BP1 | 2.71 | 3.65 | -0.93 | 0.01194 |
| BMS1 | 1.32 | 2.31 | -0.99 | 0.0119 |
| TARBP1 | 0.81 | 1.93 | -1.12 | 0.01197 |
| SMOX | 1.23 | 2.51 | -1.28 | 0.0119 |
| IGKV2-30 | 1.78 | 2.72 | -0.93 | 0.01197 |
| NCOA5 | 3.12 | 3.76 | -0.65 | 0.01192 |
| ABLIM1 | 2.3 | 3.64 | -1.34 | 0.01193 |
| MRPS31P5 | -0.76 | 1.24 | -2.01 | 0.01196 |
| HBA1 | 8.58 | 10.22 | -1.65 | 0.01192 |
| LRG1 | 5.22 | 4.02 | 1.2 | 0.01192 |
| MDN1 | 1.86 | 2.89 | -1.03 | 0.0119 |
| RP11-307C12.12 | -1.56 | 0.54 | -2.1 | 0.01196 |
| ADA | 0.2 | 1.51 | -1.3 | 0.01206 |
| RP13-890H12.2 | -0.62 | -3.09 | 2.47 | 0.01204 |
| PSMD10P1 | -2.19 | -0.63 | -1.56 | 0.01202 |
| PPP6C | 2.74 | 3.45 | -0.71 | 0.01205 |
| CTB-41I6.1 | 3.51 | 2.69 | 0.82 | 0.01206 |
| RP11-181K12.1 | -1.53 | 0.14 | -1.67 | 0.01203 |
| EPRS | 2.74 | 3.63 | -0.89 | 0.01199 |
| RP11-104L21.2 | 2.41 | 3.51 | -1.1 | 0.01202 |
| NAAA | 1.89 | 2.7 | -0.81 | 0.01203 |
| TUBGCP4 | 0.03 | 1.09 | -1.06 | 0.01199 |
| PTCRA | -0.08 | 1.66 | -1.74 | 0.01204 |
| KNOP1 | -0.34 | 0.77 | -1.11 | 0.01207 |
| PFKFB3 | 3.38 | 2.41 | 0.97 | 0.01209 |
| AC018463.4 | 1.53 | 2.3 | -0.77 | 0.01208 |
| TUBG2 | -1.35 | 0.08 | -1.42 | 0.01226 |
| CHD9 | 1.55 | 2.46 | -0.91 | 0.01218 |
| SDHAF1 | 2.14 | 2.87 | -0.73 | 0.01228 |
| RIMBP3 | -3.75 | -1.48 | -2.27 | 0.01214 |
| NUP188 | 1.09 | 2.17 | -1.08 | 0.01219 |
| KARS | 2.39 | 3.18 | -0.79 | 0.01223 |
| GLS | 2.56 | 3.48 | -0.93 | 0.01212 |
| RANGRF | -1.07 | 0.27 | -1.34 | 0.01219 |
| RP11-3D4.4 | -0.71 | -2.37 | 1.66 | 0.01228 |
| MKS1 | -1.68 | -0.44 | -1.25 | 0.01216 |
| HIST1H4J | 5.53 | 6.62 | -1.09 | 0.01223 |
| RPTOR | 1.24 | 2.19 | -0.94 | 0.01225 |
| AAAS | -0.04 | 0.99 | -1.04 | 0.01216 |
| ARHGAP6 | -1.72 | -0.16 | -1.57 | 0.01224 |
| DENND3 | 4.85 | 4.19 | 0.66 | 0.01224 |
| MBLAC1 | -1.96 | -0.51 | -1.44 | 0.01213 |
| STIP1 | 1.72 | 2.53 | -0.81 | 0.01227 |
| TIMM23 | 2.42 | 3.28 | -0.85 | 0.01228 |
| AP001429.1 | 1.32 | 2.74 | -1.42 | 0.01226 |
| CD177 | 2.99 | -1.21 | 4.2 | 0.01217 |
| CDKN1C | -1.89 | 0.18 | -2.07 | 0.01218 |
| KLHL8 | 2.15 | 1.33 | 0.81 | 0.01212 |
| FAM160B1 | 4.5 | 3.84 | 0.66 | 0.01222 |
| NT5M | -1.29 | -0.1 | -1.19 | 0.01225 |
| PXMP4 | -0.4 | 0.76 | -1.15 | 0.0121 |
| TTF2 | -0.37 | 0.68 | -1.04 | 0.01216 |
| KIAA1614-AS1 | 2.08 | 1.29 | 0.79 | 0.01212 |
| HORMAD1 | 0.92 | -0.21 | 1.13 | 0.01223 |
| RP11-70D24.3 | -1.68 | 0.19 | -1.88 | 0.01231 |
| SNCA | 3.85 | 5.18 | -1.33 | 0.01234 |
| CCAT2 | -3.02 | -0.83 | -2.19 | 0.01236 |
| RPL3 | 4.62 | 5.62 | -1.01 | 0.01237 |
| MRVI1-AS1 | 0.92 | -0.35 | 1.27 | 0.0124 |
| C2orf81 | -3.87 | -1.96 | -1.91 | 0.01241 |
| PCYOX1 | 0.97 | 1.82 | -0.85 | 0.01243 |
| ELK3 | 2.31 | 3.12 | -0.81 | 0.01243 |
| KLHL34 | -4.16 | -1.69 | -2.47 | 0.01248 |
| CCDC92 | 0.1 | 1.14 | -1.04 | 0.01249 |
| TIMP2 | 4.59 | 3.78 | 0.81 | 0.01249 |
| ABCB10 | 1.96 | 2.7 | -0.74 | 0.01257 |
| HCFC1 | 1.62 | 2.57 | -0.95 | 0.01254 |
| SH3PXD2A | -1.64 | -0.25 | -1.39 | 0.01256 |
| NPDC1 | -1.51 | 0.36 | -1.87 | 0.01256 |
| PCGF5 | 3.21 | 4.02 | -0.81 | 0.01256 |
| RP11-22B10.3 | 0.63 | 2.04 | -1.41 | 0.01254 |
| ZC3H6 | 0.18 | 1.25 | -1.07 | 0.01255 |
| BOD1L1 | 5.41 | 4.78 | 0.63 | 0.01254 |
| AFF3 | 0.01 | 1.27 | -1.26 | 0.01255 |
| TFRC | 1.4 | 2.25 | -0.85 | 0.01261 |
| GSPT1 | 4.05 | 5.05 | -1 | 0.01259 |
| GIPC1 | -1.04 | 0.23 | -1.27 | 0.01259 |
| PUS7 | -0.57 | 0.46 | -1.03 | 0.0126 |
| MBD3 | -0.2 | 0.86 | -1.05 | 0.01263 |
| NOL11 | 1.4 | 2.28 | -0.88 | 0.01269 |
| ZFP82 | -0.79 | 0.46 | -1.25 | 0.01268 |
| AC009495.2 | 2.67 | 1.42 | 1.25 | 0.01267 |
| XPO4 | 0.9 | 1.94 | -1.04 | 0.01268 |
| BANK1 | 2.15 | 3.09 | -0.93 | 0.01271 |
| FAM216A | -1.07 | 0.12 | -1.19 | 0.01274 |
| GPRIN3 | 1.77 | 3.05 | -1.28 | 0.01274 |
| ISCA1 | 2.88 | 3.61 | -0.73 | 0.01276 |
| FBLN2 | -3.12 | -1.25 | -1.87 | 0.01273 |
| MRPL18 | 1.56 | 2.49 | -0.93 | 0.01273 |
| KLHL17 | -0.94 | 0.19 | -1.13 | 0.01286 |
| BTLA | 2.31 | 3.29 | -0.98 | 0.01291 |
| TOMM40 | -0.14 | 0.96 | -1.1 | 0.01288 |
| EIF5AP3 | -1.1 | 0.17 | -1.27 | 0.01286 |
| C12orf49 | 1.27 | 2.16 | -0.89 | 0.01282 |
| TFAP4 | -0.72 | 0.38 | -1.1 | 0.01285 |
| EGF | -1.96 | -0.23 | -1.73 | 0.01284 |
| FBXL13 | 2.57 | 1.69 | 0.88 | 0.01289 |
| LAG3 | -1.28 | 0.16 | -1.44 | 0.01286 |
| RARA-AS1 | 2.58 | 1.54 | 1.04 | 0.01278 |
| RP11-809N8.4 | 4.14 | 3.29 | 0.85 | 0.01295 |
| GDF11 | 0.06 | 1.2 | -1.14 | 0.01282 |
| RPL7A | 4.9 | 5.63 | -0.73 | 0.0129 |
| RDH11 | 0.83 | 1.68 | -0.85 | 0.01279 |
| LL22NC03-80A10.6 | 1.67 | 2.46 | -0.79 | 0.0129 |
| SIT1 | 0.12 | 1.53 | -1.41 | 0.01296 |
| VPRBP | 1.67 | 2.56 | -0.9 | 0.01292 |
| C11orf63 | -1.72 | -0.41 | -1.3 | 0.01289 |
| CTC-523E23.10 | -1.5 | -0.11 | -1.39 | 0.0128 |
| LRRC37A2 | 0.19 | 1.52 | -1.33 | 0.01294 |
| DDB1 | 1.59 | 2.41 | -0.81 | 0.01289 |
| CSF3R | 7.64 | 6.75 | 0.89 | 0.01282 |
| MSRB1 | 6.02 | 5.17 | 0.85 | 0.01289 |
| NUP37 | -0.5 | 0.64 | -1.15 | 0.01296 |
| RASGRP3 | -0.9 | 0.41 | -1.31 | 0.01287 |
| RP11-700H6.1 | -1.79 | -0.49 | -1.3 | 0.01293 |
| NOL6 | 0.8 | 1.71 | -0.91 | 0.01293 |
| CFP | 4.54 | 3.83 | 0.71 | 0.0128 |
| ANKRD13C | 1.17 | 2.04 | -0.87 | 0.01294 |
| ZNF416 | 0.97 | 1.81 | -0.85 | 0.01299 |
| SEMA4C | -0.47 | 0.85 | -1.32 | 0.013 |
| GPLD1 | -3 | -1.31 | -1.69 | 0.013 |
| ACTL10 | -2.02 | 0.01 | -2.03 | 0.01298 |
| DNAJC6 | -0.47 | 0.81 | -1.28 | 0.01304 |
| LINC01513 | 1.57 | 0.48 | 1.09 | 0.01302 |
| SEMG1 | -1.68 | -3.75 | 2.07 | 0.01305 |
| CREBL2 | 2.85 | 3.68 | -0.84 | 0.01304 |
| RP11-35O15.2 | 3.28 | 2.39 | 0.9 | 0.01304 |
| KLHDC4 | 0.54 | 1.48 | -0.95 | 0.01311 |
| WDR4 | 0.29 | 1.51 | -1.22 | 0.01311 |
| FUT7 | 3.91 | 2.94 | 0.97 | 0.01312 |
| ALAS2 | 6.09 | 7.78 | -1.68 | 0.01317 |
| GCN1 | 2.41 | 3.32 | -0.91 | 0.01315 |
| RP11-819C21.1 | 0.9 | 2 | -1.11 | 0.01313 |
| RP11-396C23.4 | 3.58 | 2.88 | 0.7 | 0.01315 |
| TRAM2 | 1.4 | 2.39 | -0.98 | 0.01312 |
| ADO | 1.72 | 2.6 | -0.88 | 0.01315 |
| GMIP | 6.15 | 5.43 | 0.72 | 0.01317 |
| RNASE2 | 3.41 | 2.45 | 0.96 | 0.01316 |
| LLNLR-268E12.1 | -2.3 | -0.6 | -1.69 | 0.01307 |
| MRPL11 | -0.99 | 0.38 | -1.37 | 0.01314 |
| EBNA1BP2 | -0.54 | 0.46 | -1.01 | 0.01314 |
| ZNF367 | 0.09 | 1.08 | -0.99 | 0.01311 |
| SLC25A17 | -0.83 | 0.33 | -1.17 | 0.01321 |
| SLC9B1 | -3.91 | -1.26 | -2.65 | 0.01325 |
| CRIM1 | -0.59 | 0.72 | -1.3 | 0.01325 |
| RP5-892K4.1 | -1.06 | -3.5 | 2.44 | 0.01324 |
| EPHA1 | -1.16 | 0.12 | -1.27 | 0.01324 |
| PET117 | 0.41 | 1.65 | -1.24 | 0.01326 |
| HLA-DPB2 | -2.98 | -0.67 | -2.3 | 0.01323 |
| RP11-867G23.8 | -2.5 | -0.67 | -1.83 | 0.01332 |
| DOC2B | -1.83 | -3.61 | 1.78 | 0.0133 |
| TMLHE-AS1 | 1.56 | 0.52 | 1.04 | 0.0133 |
| SERBP1 | 2.74 | 3.43 | -0.69 | 0.01332 |
| CTPS1 | 0.37 | 1.33 | -0.96 | 0.0133 |
| IGSF9B | -0.84 | 0.39 | -1.22 | 0.01329 |
| FBXL5 | 6.3 | 5.67 | 0.63 | 0.01334 |
| PRDX1 | 2.46 | 3.3 | -0.84 | 0.01334 |
| ANAPC1P1 | -0.82 | 0.44 | -1.27 | 0.01333 |
| WDR60 | -0.22 | 0.8 | -1.02 | 0.01336 |
| PLEKHA5 | -2.22 | -0.59 | -1.63 | 0.01338 |
| RP11-729L2.2 | 0.81 | -0.74 | 1.55 | 0.01337 |
| RP5-894A10.2 | 1.48 | 2.35 | -0.86 | 0.01336 |
| EIF5A2 | -0.65 | 0.68 | -1.33 | 0.01345 |
| EFTUD1 | 1.14 | 2.05 | -0.91 | 0.01348 |
| PPIAL4C | 1.45 | 2.52 | -1.07 | 0.01346 |
| WNT7A | -2.44 | -0.87 | -1.57 | 0.01344 |
| BACE1-AS | -0.4 | 0.89 | -1.29 | 0.01344 |
| CADM4 | 0.43 | -0.63 | 1.06 | 0.01349 |
| DIMT1 | 0.62 | 1.56 | -0.94 | 0.01346 |
| RP11-767C1.2 | -0.24 | 1.38 | -1.63 | 0.01342 |
| PTGER2 | 1.98 | 2.97 | -0.99 | 0.01348 |
| RP5-858L17.1 | 3.54 | 2.81 | 0.73 | 0.01345 |
| RP11-497H16.7 | 0.25 | -1.11 | 1.36 | 0.0135 |
| ITGB5 | -0.98 | 0.6 | -1.57 | 0.01343 |
| RP11-1212A22.1 | 0.59 | 1.57 | -0.98 | 0.01346 |
| GPD1L | -0.15 | 1.27 | -1.42 | 0.01353 |
| ADAMTS7P1 | -3.11 | -1.31 | -1.81 | 0.01355 |
| CTC-297N7.1 | -1.66 | 0.4 | -2.06 | 0.01356 |
| DYNLL1 | 1.25 | 2.03 | -0.78 | 0.01359 |
| AMIGO1 | 0.19 | 1.19 | -1 | 0.01361 |
| SF3A2 | 2.41 | 3.15 | -0.74 | 0.01364 |
| PCID2 | 0.83 | 1.83 | -1.01 | 0.01363 |
| RP5-1112D6.7 | 1.12 | 1.97 | -0.85 | 0.01375 |
| RP11-316M21.7 | 1.55 | 0.18 | 1.37 | 0.0137 |
| ZBTB39 | 0.98 | 1.88 | -0.91 | 0.01375 |
| PPAN | 0.48 | 1.54 | -1.06 | 0.01366 |
| FAM46C | 6.25 | 7.5 | -1.25 | 0.01367 |
| F13A1 | 4.49 | 5.87 | -1.39 | 0.01376 |
| LYRM1 | 1.73 | 0.73 | 1 | 0.01375 |
| PEAR1 | -2.71 | -0.39 | -2.32 | 0.01375 |
| AQP3 | 0.08 | 1.33 | -1.25 | 0.01375 |
| SET | 3.65 | 4.38 | -0.73 | 0.01375 |
| EIF1AX | 1.82 | 3.06 | -1.24 | 0.0137 |
| AP001628.6 | -0.82 | 0.85 | -1.67 | 0.01368 |
| ARL4C | 3.8 | 4.76 | -0.96 | 0.01369 |
| HSPA6 | 6.64 | 5.75 | 0.89 | 0.01369 |
| VTI1B | 2.81 | 3.43 | -0.62 | 0.01381 |
| DOK3 | 4.82 | 4 | 0.82 | 0.01384 |
| MTMR2 | -0.2 | 0.84 | -1.04 | 0.01381 |
| HSF5 | -2.37 | -0.59 | -1.77 | 0.01383 |
| PKIG | 0.19 | 1.21 | -1.03 | 0.01383 |
| AARS2 | 1.23 | 2.07 | -0.83 | 0.01385 |
| PJA1 | -1.62 | -0.19 | -1.43 | 0.01378 |
| PTPMT1 | -0.36 | 0.74 | -1.1 | 0.01385 |
| NSA2 | 0.98 | 1.96 | -0.98 | 0.01385 |
| GPR180 | 0.28 | 1.24 | -0.96 | 0.01383 |
| RP11-384C4.2 | 2.02 | 1.05 | 0.97 | 0.01387 |
| ACSS3 | 1.05 | 0.06 | 0.99 | 0.01386 |
| KCTD17 | -0.94 | 0.32 | -1.26 | 0.01384 |
| ABCC4 | 0.92 | 1.76 | -0.84 | 0.0138 |
| RP11-514P8.6 | 1.02 | -0.63 | 1.65 | 0.01384 |
| RANGAP1 | 1.58 | 2.33 | -0.75 | 0.01389 |
| WWP1 | 2.36 | 3.43 | -1.07 | 0.0139 |
| RP11-106M3.2 | -3.15 | -0.99 | -2.16 | 0.01396 |
| BCOR | 0.53 | 1.5 | -0.96 | 0.01393 |
| SULT1B1 | 5.57 | 4.7 | 0.87 | 0.01392 |
| GLUD1 | 3.58 | 4.33 | -0.74 | 0.01397 |
| BEND7 | 0.19 | -2.19 | 2.38 | 0.01397 |
| AGFG2 | 0.36 | 1.6 | -1.23 | 0.01394 |
| SURF2 | -0.02 | 1.04 | -1.06 | 0.01399 |
| NAP1L4P1 | 4 | 3.36 | 0.64 | 0.014 |
| ZNF540 | -1.55 | -0.32 | -1.23 | 0.01398 |
| SBDSP1 | 0.54 | 1.55 | -1.01 | 0.01394 |
| ANKEF1 | -1.3 | -0.06 | -1.24 | 0.01399 |
| ZNF33A | 3.22 | 2.59 | 0.63 | 0.01393 |
| DGKG | 2.23 | 1.31 | 0.92 | 0.01401 |
| CD81 | 0.64 | 1.8 | -1.16 | 0.01403 |
| DTD2 | -0.27 | 0.86 | -1.13 | 0.01403 |
| TSHZ3 | 2.68 | 1.75 | 0.93 | 0.01404 |
| EIF3M | 1.69 | 2.47 | -0.77 | 0.01408 |
| SCD | -0.08 | 0.85 | -0.94 | 0.01408 |
| ALG10B | -2.17 | -0.04 | -2.13 | 0.0141 |
| PHGDH | -3.32 | -1.24 | -2.08 | 0.01413 |
| ABAT | 2.05 | 1.09 | 0.96 | 0.01413 |
| PRMT7 | -0.27 | 0.83 | -1.09 | 0.01415 |
| ASCC3 | 1.95 | 2.87 | -0.92 | 0.01415 |
| SERPINB2 | 0.17 | -0.94 | 1.11 | 0.01413 |
| RP13-580F15.2 | -1.99 | 0.12 | -2.11 | 0.01416 |
| GPATCH11 | 1.53 | 2.47 | -0.95 | 0.0142 |
| IFITM2 | 7.63 | 6.8 | 0.83 | 0.0142 |
| KLHL15 | 1.41 | 2.17 | -0.76 | 0.01419 |
| IMPDH1 | 4.4 | 3.68 | 0.72 | 0.01421 |
| SRP72 | 2.25 | 3.03 | -0.78 | 0.01423 |
| PKD1P6 | -0.57 | 0.53 | -1.1 | 0.01424 |
| RPP30 | 0.32 | 1.29 | -0.98 | 0.01426 |
| TAS2R62P | -0.87 | 0.96 | -1.83 | 0.01427 |
| HLA-DOB | 1.23 | 2.17 | -0.95 | 0.01428 |
| PLPP1 | -1.67 | -0.44 | -1.23 | 0.01434 |
| QTRT1 | -1.65 | -0.25 | -1.4 | 0.01435 |
| SAMD3 | 1.56 | 2.66 | -1.1 | 0.01438 |
| ITFG2 | 1.15 | 2.08 | -0.93 | 0.0143 |
| YIPF6 | -1.15 | 0.77 | -1.91 | 0.01437 |
| TMEM14A | -1.38 | 0.57 | -1.95 | 0.01437 |
| SREBF2 | 1.65 | 2.45 | -0.8 | 0.01435 |
| SLC25A33 | -1.21 | -0.05 | -1.16 | 0.01435 |
| SP4 | 2.06 | 2.95 | -0.89 | 0.01439 |
| AC104820.2 | -0.06 | 1.3 | -1.36 | 0.01431 |
| RLN1 | -2.35 | -0.35 | -2 | 0.01437 |
| PMVK | 1.17 | 2.3 | -1.13 | 0.01436 |
| NAT10 | 1.29 | 2.16 | -0.87 | 0.01434 |
| ANAPC1 | 0.86 | 1.87 | -1.01 | 0.0145 |
| CD22 | 0.2 | 1.38 | -1.18 | 0.01447 |
| HIST1H2AM | 5.26 | 6.05 | -0.79 | 0.01446 |
| OXCT1 | 0.85 | 1.89 | -1.04 | 0.01445 |
| CD93 | 6.88 | 6.17 | 0.72 | 0.01442 |
| ACTG1P17 | -2.19 | -0.57 | -1.62 | 0.01451 |
| PLXNA3 | -0.28 | 0.91 | -1.19 | 0.01443 |
| ILF3 | 1.95 | 2.88 | -0.92 | 0.01452 |
| RP11-92K15.3 | -0.75 | 0.65 | -1.4 | 0.01445 |
| LMNB1 | 3.83 | 2.94 | 0.89 | 0.0145 |
| LYRM7 | 1.01 | 1.89 | -0.89 | 0.01441 |
| TKT | 5.13 | 4.39 | 0.74 | 0.01451 |
| AHNAK | 6.23 | 7.25 | -1.02 | 0.0145 |
| RN7SL735P | 0.09 | 1.48 | -1.38 | 0.01448 |
| BTG1P1 | 2.17 | 3.75 | -1.58 | 0.01442 |
| SMC5-AS1 | -2.19 | -0.67 | -1.52 | 0.01449 |
| C19orf35 | 4.12 | 2.83 | 1.29 | 0.01443 |
| HERC2 | 1.44 | 2.31 | -0.87 | 0.01454 |
| PDS5A | 2.84 | 3.68 | -0.84 | 0.01457 |
| CALD1 | -4.34 | -2.14 | -2.2 | 0.01457 |
| GNPNAT1 | -0.23 | 0.95 | -1.18 | 0.01457 |
| PTPN13 | -2.19 | -0.3 | -1.9 | 0.01461 |
| POLR3H | -0.27 | 0.81 | -1.08 | 0.0146 |
| RPS6KA1 | 4.46 | 3.86 | 0.61 | 0.01473 |
| PLXNA2 | 1.19 | -0.03 | 1.22 | 0.01475 |
| NID1 | -0.63 | 1.22 | -1.86 | 0.01476 |
| GLIPR1 | 6.13 | 5.45 | 0.68 | 0.01473 |
| TTC37 | 2.05 | 2.95 | -0.9 | 0.01475 |
| RP11-131L12.4 | 0.44 | 1.47 | -1.03 | 0.01466 |
| LIN7C | 1.88 | 2.95 | -1.07 | 0.01474 |
| LINC00563 | -1.96 | -0.14 | -1.82 | 0.01472 |
| ARSK | -1.39 | 0.05 | -1.44 | 0.01472 |
| TXK | 2.98 | 3.7 | -0.72 | 0.01469 |
| AHDC1 | 0.15 | 1.19 | -1.04 | 0.0147 |
| RNASEH2B | 1.27 | 2.22 | -0.95 | 0.01467 |
| UTP15 | -0.6 | 0.57 | -1.17 | 0.01468 |
| C16orf58 | 0.44 | 1.43 | -0.99 | 0.01468 |
| POLR1A | 0.57 | 1.57 | -0.99 | 0.01475 |
| MORC2 | 1.58 | 2.53 | -0.95 | 0.01465 |
| ST8SIA1 | -2.83 | -1.04 | -1.79 | 0.01478 |
| PA2G4P4 | 1.69 | 2.58 | -0.89 | 0.01481 |
| TRAV17 | 1.67 | 2.57 | -0.91 | 0.0148 |
| ZNF124 | 0.6 | 1.44 | -0.84 | 0.01482 |
| SLC25A15 | -0.48 | 0.62 | -1.11 | 0.01479 |
| TM9SF2 | 6.17 | 5.58 | 0.6 | 0.01483 |
| PBX1 | -2.48 | -1.1 | -1.38 | 0.01487 |
| FAM89B | 0.63 | 1.66 | -1.04 | 0.01486 |
| RP11-501J20.5 | -0.15 | 1.83 | -1.98 | 0.0149 |
| COA4 | 0.81 | 1.68 | -0.87 | 0.01498 |
| G6PD | 4.5 | 3.86 | 0.64 | 0.01497 |
| TP53 | 1 | 1.87 | -0.87 | 0.01493 |
| RAD51D | -0.56 | 0.54 | -1.1 | 0.01494 |
| RP11-93B14.9 | 3.21 | 2.26 | 0.95 | 0.01498 |
| ZNF566 | -2.71 | -0.72 | -1.99 | 0.01493 |
| AC007278.2 | 4.46 | 2.69 | 1.77 | 0.01496 |
| CHID1 | -0.69 | 0.33 | -1.02 | 0.01495 |
| ALDH6A1 | -0.49 | 0.69 | -1.19 | 0.01491 |
| ZNF681 | -0.83 | 0.58 | -1.41 | 0.01495 |
| RP11-147L13.14 | 1.6 | 2.78 | -1.18 | 0.01502 |
| DNMT1 | 1.03 | 1.99 | -0.96 | 0.01504 |
| TAS2R3 | 0.92 | 2.14 | -1.22 | 0.01502 |
| RP11-488C13.1 | 1.82 | 2.6 | -0.79 | 0.01506 |
| HABP4 | -0.01 | 1.17 | -1.18 | 0.01503 |
| SCD5 | -2.03 | 0.34 | -2.37 | 0.01507 |
| TRIM44 | 2.61 | 3.36 | -0.75 | 0.01504 |
| ISCA1P1 | 2.02 | 3.03 | -1.01 | 0.01502 |
| API5 | 1.77 | 2.76 | -0.99 | 0.01504 |
| RANBP1 | -0.14 | 0.89 | -1.03 | 0.01508 |
| RP11-157H4.1 | 1 | 2.17 | -1.16 | 0.01512 |
| THOC1 | 0.62 | 1.46 | -0.84 | 0.01512 |
| VDAC1P2 | -0.38 | 0.61 | -0.98 | 0.01513 |
| STYX | 1.95 | 2.76 | -0.81 | 0.01516 |
| NONO | 2.27 | 2.95 | -0.68 | 0.01516 |
| DHRS3 | 1.54 | 2.39 | -0.84 | 0.01515 |
| DBNL | 4.59 | 4 | 0.58 | 0.01514 |
| IGHV3-21 | 2.25 | 3.47 | -1.22 | 0.01521 |
| SLC14A1 | 0.27 | 1.49 | -1.23 | 0.01521 |
| TOMM20P2 | 4.2 | 5.25 | -1.05 | 0.01521 |
| ADGRL1 | -0.55 | 0.49 | -1.04 | 0.01522 |
| PYGB | 3.04 | 3.71 | -0.67 | 0.01518 |
| SNPH | -0.98 | 0.13 | -1.11 | 0.01522 |
| ANO9 | -0.84 | 0.41 | -1.26 | 0.01523 |
| THEM4 | 1.59 | 2.47 | -0.88 | 0.01524 |
| METAP1 | 1.28 | 2.19 | -0.91 | 0.01526 |
| TRBV2 | 1.63 | 2.84 | -1.21 | 0.01528 |
| TMTC3 | 0.81 | 1.75 | -0.94 | 0.01528 |
| CXCR1 | 8.97 | 8.09 | 0.88 | 0.01541 |
| RP11-946L16.2 | 1.15 | 0.03 | 1.12 | 0.01537 |
| PASK | -0.05 | 0.93 | -0.99 | 0.01538 |
| ZNF318 | 2.46 | 3.18 | -0.72 | 0.01532 |
| THAP11 | 2.61 | 3.25 | -0.64 | 0.01538 |
| OTUD7B | -0.24 | 0.84 | -1.08 | 0.01531 |
| TMEM127 | 5.14 | 4.56 | 0.58 | 0.01536 |
| MTR | 1.64 | 2.48 | -0.84 | 0.0154 |
| LARS | 1.63 | 2.6 | -0.98 | 0.01539 |
| SATB1-AS1 | -0.98 | 0.18 | -1.15 | 0.01534 |
| RP5-1180E21.5 | 3.59 | 4.3 | -0.71 | 0.01532 |
| RP11-611O2.1 | 3.45 | 2.55 | 0.9 | 0.0154 |
| RP11-68I3.11 | 5.52 | 4.9 | 0.62 | 0.01538 |
| MAST4 | -0.92 | 0.16 | -1.09 | 0.0154 |
| URI1 | 1.59 | 2.54 | -0.94 | 0.01536 |
| RP11-535A5.1 | -0.25 | 1.47 | -1.71 | 0.01534 |
| CAMK2D | 0.93 | 1.83 | -0.9 | 0.01532 |
| IPO5 | 0.91 | 1.8 | -0.9 | 0.01548 |
| TMEM223 | 0.13 | 1.1 | -0.97 | 0.01547 |
| MTSS1L | -2.83 | -1.01 | -1.82 | 0.01543 |
| CFAP58-AS1 | 2.55 | 1.17 | 1.38 | 0.01546 |
| RALGDS | 0.81 | 1.72 | -0.92 | 0.01547 |
| PPP1R13B | -1.13 | 0.14 | -1.28 | 0.01544 |
| NAT6 | -2.29 | -0.8 | -1.49 | 0.01546 |
| S100A8 | 9.53 | 7.82 | 1.71 | 0.01549 |
| CTC-471J1.2 | -0.31 | 1.09 | -1.4 | 0.0155 |
| RAI1 | 0.29 | 1.28 | -1 | 0.01552 |
| BPGM | 3.2 | 4.27 | -1.07 | 0.01565 |
| CTD-2653M23.3 | -1.35 | 0.03 | -1.38 | 0.01562 |
| PTEN | 6.21 | 5.62 | 0.59 | 0.01565 |
| AGTPBP1 | 5 | 4.44 | 0.56 | 0.01557 |
| ICE2 | 0.25 | 1.19 | -0.93 | 0.01564 |
| ABHD17A | 1.67 | 2.48 | -0.8 | 0.01555 |
| NFATC3 | 3.03 | 3.79 | -0.76 | 0.01562 |
| TREML2 | 5.31 | 4.37 | 0.94 | 0.0156 |
| TP53INP1 | 5.91 | 5.33 | 0.59 | 0.01563 |
| AC241377.2 | -2.67 | -0.25 | -2.42 | 0.01562 |
| RAD23BP1 | -1.26 | 0.4 | -1.66 | 0.01564 |
| DDI2 | 2.2 | 2.96 | -0.76 | 0.01556 |
| N6AMT2 | -1.53 | -0.19 | -1.34 | 0.01558 |
| ERCC1 | 0.68 | 1.51 | -0.83 | 0.01557 |
| IGLV2-11 | 0.85 | 2.25 | -1.4 | 0.01562 |
| CTC-448F2.6 | 1.2 | 2.03 | -0.83 | 0.01555 |
| SNHG16 | 0.74 | 1.71 | -0.97 | 0.01568 |
| RNF11 | 4.41 | 5.27 | -0.86 | 0.01568 |
| GSDMB | 0.6 | 1.66 | -1.06 | 0.01568 |
| TIAM1 | 1.3 | 2.39 | -1.08 | 0.01572 |
| LRPPRC | 1.95 | 2.87 | -0.92 | 0.0158 |
| GALNS | 2.64 | 1.97 | 0.66 | 0.01576 |
| TXNIP | 9.86 | 9.09 | 0.77 | 0.01579 |
| PDP2 | -1.37 | 0.18 | -1.54 | 0.01577 |
| LNPEP | 4.07 | 4.88 | -0.81 | 0.0158 |
| ATP13A2 | 0.69 | 1.51 | -0.81 | 0.01576 |
| FASTKD1 | 0.55 | 1.48 | -0.93 | 0.0158 |
| ENKUR | -1.53 | -0.04 | -1.48 | 0.01583 |
| RP11-196G18.24 | 4.41 | 3.59 | 0.82 | 0.01583 |
| NCALD | -1.78 | -0.27 | -1.5 | 0.01586 |
| CTC-523E23.1 | -0.78 | 0.41 | -1.2 | 0.01589 |
| RP11-4L24.4 | -3.47 | -1.46 | -2 | 0.01588 |
| RP11-65L3.2 | 3.79 | 3.05 | 0.74 | 0.01591 |
| NCF1C | 8.52 | 7.66 | 0.86 | 0.01592 |
| RPL10A | 5.15 | 6.02 | -0.86 | 0.01592 |
| CD2 | 4.07 | 5.2 | -1.13 | 0.01591 |
| TNFRSF25 | -0.35 | 1.01 | -1.35 | 0.01589 |
| RP11-400F19.18 | 2.77 | 1.99 | 0.78 | 0.01597 |
| RPS12P26 | 4.28 | 3.61 | 0.67 | 0.01599 |
| B3GAT3 | 1.1 | 2.02 | -0.92 | 0.01598 |
| C9orf139 | 2.71 | 1.9 | 0.81 | 0.01599 |
| SLAMF1 | 0.83 | 2.26 | -1.42 | 0.01598 |
| DBNDD1 | -3.38 | -1.66 | -1.72 | 0.016 |
| RP11-284B18.3 | -1.08 | 0.06 | -1.14 | 0.01602 |
| PRMT1 | 0.93 | 1.74 | -0.81 | 0.01604 |
| ZBTB5 | 1.23 | 2.12 | -0.88 | 0.01604 |
| FAM209A | 1.35 | 0.32 | 1.03 | 0.0161 |
| NAPEPLD | -0.88 | 0.27 | -1.15 | 0.01618 |
| CCNJ | -0.08 | 1.03 | -1.11 | 0.01614 |
| RP11-476D10.1 | 1.82 | 0.4 | 1.42 | 0.0161 |
| ITGAX | 6.51 | 5.69 | 0.83 | 0.01611 |
| MTND1P11 | 3.63 | 2.8 | 0.83 | 0.01612 |
| XRCC4 | 1.33 | 0.4 | 0.93 | 0.01614 |
| ZNF41 | 0.12 | 2.5 | -2.38 | 0.01619 |
| CRIP2 | -2.95 | -1.12 | -1.83 | 0.01615 |
| GP6 | -1.05 | 0.75 | -1.79 | 0.01618 |
| SRPRB | 0.75 | 1.73 | -0.97 | 0.01617 |
| JMY | 1.62 | 2.47 | -0.85 | 0.01618 |
| GPR146 | 0.63 | 2.04 | -1.4 | 0.01614 |
| CD99 | 3.24 | 3.9 | -0.66 | 0.01623 |
| RARRES3 | 2.53 | 3.31 | -0.78 | 0.01622 |
| RORC | -1.54 | 0.43 | -1.97 | 0.01621 |
| MEN1 | -0.34 | 0.6 | -0.94 | 0.01623 |
| EIF3H | 2.95 | 3.62 | -0.67 | 0.01628 |
| DCAF17 | 0.03 | 1.3 | -1.27 | 0.01626 |
| TRG-AS1 | 2.5 | 3.6 | -1.1 | 0.01625 |
| RN7SKP97 | 2.05 | 0.95 | 1.1 | 0.01627 |
| TOMM22 | 2.25 | 2.91 | -0.66 | 0.01628 |
| ABCB8 | -0.67 | 0.42 | -1.09 | 0.01631 |
| LLGL1 | 0.27 | 1.22 | -0.95 | 0.01631 |
| ZDBF2 | -1.4 | -0.23 | -1.17 | 0.0163 |
| MAP3K4 | 1.52 | 2.36 | -0.84 | 0.01633 |
| IGLV1-44 | 0.7 | 1.82 | -1.12 | 0.01635 |
| TC2N | 2.13 | 3.46 | -1.32 | 0.01637 |
| RP11-320M2.1 | -2.16 | -0.63 | -1.53 | 0.01637 |
| CCT3 | 1.97 | 2.74 | -0.77 | 0.01642 |
| RNF157 | 0.47 | 1.48 | -1.01 | 0.01645 |
| RP11-165N19.2 | 0.8 | 1.63 | -0.83 | 0.0165 |
| EIF2B3 | 0.1 | 1.13 | -1.03 | 0.01649 |
| TMEM55A | 3.93 | 3.3 | 0.63 | 0.0165 |
| SLC35C1 | 0.59 | 1.45 | -0.86 | 0.01642 |
| CEP72 | 0.23 | 1.2 | -0.97 | 0.01653 |
| FMNL3 | 0.71 | 2.09 | -1.39 | 0.0165 |
| TCF19 | -1.1 | 0.2 | -1.3 | 0.01651 |
| RP11-319G9.3 | -1.82 | -0.18 | -1.64 | 0.01651 |
| PLP2 | 6.05 | 5.4 | 0.64 | 0.01648 |
| MRPS16 | 0.5 | 1.38 | -0.87 | 0.01646 |
| FOPNL | 0.84 | 1.61 | -0.76 | 0.01648 |
| RP11-799D4.4 | 1.11 | 2.06 | -0.96 | 0.0165 |
| OGFOD1 | 0.47 | 1.43 | -0.95 | 0.01649 |
| LTB | 4.06 | 4.88 | -0.82 | 0.01655 |
| IGSF8 | 0.87 | 1.82 | -0.95 | 0.01655 |
| PGM2L1 | 0.52 | 1.39 | -0.87 | 0.01656 |
| POLRMT | 0.61 | 1.59 | -0.97 | 0.01658 |
| EIF2S3L | -0.68 | 1.85 | -2.52 | 0.0166 |
| CALHM2 | 1.43 | 2.25 | -0.82 | 0.01659 |
| SIPA1L1 | 3.77 | 3.11 | 0.66 | 0.0166 |
| SNORA53 | 3.55 | 1.79 | 1.76 | 0.01664 |
| PPAT | -0.91 | 0.27 | -1.18 | 0.01668 |
| DSTN | 1.6 | 2.44 | -0.84 | 0.01667 |
| RP1-153P14.7 | -1.72 | -0.34 | -1.38 | 0.01668 |
| TRIP10 | -3.59 | -1.71 | -1.89 | 0.0167 |
| MAN1A2 | 2.66 | 3.46 | -0.8 | 0.01678 |
| CEP295NL | 2.47 | 1.72 | 0.74 | 0.01676 |
| SPTLC2 | 4.77 | 4.16 | 0.61 | 0.01679 |
| PIGU | 0.48 | 1.61 | -1.13 | 0.01676 |
| RP13-128O4.3 | 2.59 | 1.74 | 0.86 | 0.01675 |
| HIVEP2 | 3.23 | 3.91 | -0.68 | 0.01672 |
| PLBD2 | 1.07 | 2.1 | -1.03 | 0.01674 |
| C15orf54 | -1.41 | 0.53 | -1.94 | 0.01677 |
| CSTA | 3.92 | 2.68 | 1.24 | 0.01676 |
| MIR600HG | -0.33 | 0.7 | -1.03 | 0.0168 |
| MPI | -1.14 | 0.06 | -1.19 | 0.01685 |
| IER5 | 2.33 | 3.08 | -0.75 | 0.01704 |
| ANXA6 | 3.88 | 4.76 | -0.88 | 0.01693 |
| UBE3A | 1.35 | 2.18 | -0.83 | 0.01702 |
| TRBV6-2 | 0.05 | 1.9 | -1.86 | 0.01695 |
| STK39 | 2.23 | 3.07 | -0.84 | 0.01686 |
| RAB27A | 4.25 | 3.69 | 0.57 | 0.01696 |
| CYP20A1 | 0.74 | 1.63 | -0.89 | 0.01687 |
| ABCC13 | -3.56 | -1.29 | -2.27 | 0.01702 |
| RP11-209D14.4 | 3.76 | 3.04 | 0.71 | 0.01698 |
| RHPN1 | -2.13 | -0.5 | -1.62 | 0.01686 |
| RCL1 | -0.34 | 0.77 | -1.12 | 0.01704 |
| FKBP9 | -0.04 | -1.27 | 1.23 | 0.01693 |
| RP11-20I23.6 | 0.07 | -1.36 | 1.44 | 0.01685 |
| PDIA4 | 3.17 | 4.02 | -0.85 | 0.01704 |
| AC093495.4 | 1.56 | 0.56 | 1 | 0.01699 |
| TWISTNB | 0.53 | 1.55 | -1.02 | 0.01692 |
| CNPPD1 | 3.43 | 4.11 | -0.68 | 0.01683 |
| RPL13P12 | 5.54 | 6.33 | -0.78 | 0.01701 |
| CTD-2302E22.5 | 0.47 | 1.54 | -1.07 | 0.01701 |
| ACO2 | 2.64 | 3.38 | -0.74 | 0.01701 |
| MSANTD3 | -0.59 | 0.39 | -0.98 | 0.01689 |
| LRRN1 | 1.26 | -0.55 | 1.81 | 0.01701 |
| AKAP1 | -0.3 | 0.62 | -0.93 | 0.01701 |
| GP5 | -0.84 | 0.59 | -1.42 | 0.01692 |
| SIGIRR | 0.71 | 1.74 | -1.04 | 0.0169 |
| SCIMP | 2.63 | 3.32 | -0.68 | 0.017 |
| WASF1 | -2.48 | -0.81 | -1.67 | 0.01699 |
| AC007950.1 | 1.23 | -0.79 | 2.01 | 0.01701 |
| RP11-98I9.4 | 1.21 | 2.16 | -0.96 | 0.01707 |
| TAS2R20 | 0.2 | 1.21 | -1.01 | 0.0171 |
| ZMYM3 | 0.1 | 1.09 | -0.99 | 0.01714 |
| HMGN1 | 1.15 | 2.04 | -0.89 | 0.01716 |
| MTA1 | 0.85 | 1.65 | -0.8 | 0.01717 |
| KCNMB4 | -4.93 | -2.44 | -2.49 | 0.01713 |
| EDARADD | -2.21 | -0.37 | -1.84 | 0.01716 |
| CELSR1 | -2.44 | -0.96 | -1.48 | 0.01715 |
| SLC25A5 | 3.89 | 4.52 | -0.63 | 0.01715 |
| MSANTD2 | 0.06 | 1.04 | -0.98 | 0.01725 |
| CEACAM8 | 2.5 | 0.46 | 2.04 | 0.01726 |
| RP11-160E2.11 | -1.07 | 2.52 | -3.59 | 0.01729 |
| NTPCR | -0.59 | 0.57 | -1.16 | 0.01731 |
| ATAD2 | 0.8 | 1.66 | -0.86 | 0.01733 |
| TRAV6 | -0.13 | 1.35 | -1.48 | 0.01743 |
| NUDC | 2.05 | 2.79 | -0.74 | 0.01744 |
| RP11-474P2.5 | 0.85 | 1.92 | -1.07 | 0.01742 |
| TADA1 | 1.18 | 2.09 | -0.92 | 0.01742 |
| PRR5L | 0.49 | 1.76 | -1.27 | 0.01739 |
| CD28 | 0.6 | 1.68 | -1.08 | 0.01743 |
| SPRED1 | -1.44 | 0.13 | -1.57 | 0.01738 |
| SERPINB9P1 | 1.02 | 1.8 | -0.78 | 0.01736 |
| GTPBP10 | -0.29 | 0.74 | -1.03 | 0.01742 |
| SLC4A7 | 1.31 | 2.4 | -1.09 | 0.0174 |
| PDIA6 | 2.58 | 3.4 | -0.82 | 0.0174 |
| COG6 | 0.17 | 1.17 | -1 | 0.01737 |
| SLC27A4 | 0.57 | 1.42 | -0.85 | 0.01742 |
| GLRX5 | 2.99 | 4.02 | -1.03 | 0.01746 |
| WDR12 | -0.43 | 0.58 | -1.01 | 0.01748 |
| MTND5P5 | 1.47 | 2.81 | -1.35 | 0.01751 |
| SETD1A | 1.37 | 2.22 | -0.84 | 0.0175 |
| SUN1 | 0.16 | 1.13 | -0.97 | 0.01752 |
| BCKDK | 2.58 | 1.81 | 0.78 | 0.01751 |
| ERICH6-AS1 | -1.37 | 0.06 | -1.44 | 0.01754 |
| KLHL26 | -0.91 | 0.26 | -1.17 | 0.01757 |
| SNX25 | 0.35 | 1.39 | -1.03 | 0.0176 |
| TSPAN7 | -2.71 | -0.85 | -1.86 | 0.01766 |
| SLC25A25-AS1 | 0.64 | 1.55 | -0.91 | 0.01763 |
| DPEP3 | 1.99 | 1.22 | 0.77 | 0.01765 |
| MGRN1 | 2.86 | 2.14 | 0.72 | 0.01767 |
| GBE1 | 2.21 | 1.54 | 0.68 | 0.01768 |
| RP11-301G21.1 | -0.04 | 1.36 | -1.41 | 0.01762 |
| AP001619.2 | -0.72 | 0.51 | -1.22 | 0.01765 |
| ARHGAP5 | 0.79 | 1.65 | -0.86 | 0.01765 |
| RP11-651L5.3 | 1.33 | 0.51 | 0.82 | 0.01767 |
| FASLG | 1.18 | 2.4 | -1.22 | 0.0177 |
| CTC-329D1.2 | -1.35 | -0.04 | -1.3 | 0.01773 |
| OLR1 | -1.04 | -2.96 | 1.92 | 0.01772 |
| HSPBP1 | -1.8 | -0.5 | -1.31 | 0.01777 |
| MSL3 | 3.72 | 3.05 | 0.67 | 0.01781 |
| SHCBP1 | -1.04 | -3.03 | 1.98 | 0.01781 |
| DPH5 | -0.88 | 0.21 | -1.08 | 0.0178 |
| NGRN | 1.02 | 2.02 | -1 | 0.01779 |
| RPL21P44 | 3.37 | 2.58 | 0.79 | 0.01779 |
| USP37 | 0.6 | 1.54 | -0.94 | 0.01783 |
| GMPS | 1.88 | 2.72 | -0.85 | 0.01785 |
| MYL6 | 3.62 | 2.88 | 0.74 | 0.01786 |
| RP11-511P7.5 | -2.35 | -0.17 | -2.19 | 0.01787 |
| TNKS1BP1 | -2.25 | -0.8 | -1.45 | 0.01791 |
| LINC01215 | 1.87 | 2.7 | -0.84 | 0.01794 |
| SUMO2 | 2.82 | 3.49 | -0.67 | 0.01794 |
| ABTB1 | 5.39 | 4.49 | 0.9 | 0.01795 |
| SMC2 | -0.7 | 0.45 | -1.15 | 0.01794 |
| TP53I13 | -0.76 | 0.61 | -1.37 | 0.01795 |
| B4GALT5 | 5.99 | 5.01 | 0.97 | 0.01795 |
| NOC3L | 1.17 | 2.15 | -0.99 | 0.01796 |
| MPZL2 | 1.26 | 0.48 | 0.79 | 0.01804 |
| SPIN1 | 0.56 | 2.34 | -1.78 | 0.01799 |
| SYAP1 | 3.18 | 2.45 | 0.73 | 0.01807 |
| SNHG14 | -0.68 | 0.61 | -1.29 | 0.01804 |
| TUBA8 | -0.67 | 0.5 | -1.16 | 0.01802 |
| BUB3 | 2.58 | 3.44 | -0.85 | 0.01806 |
| VGLL4 | 0.69 | 1.51 | -0.82 | 0.018 |
| CARNS1 | -2.03 | -0.48 | -1.56 | 0.01798 |
| CTD-3022G6.1 | 1.48 | 0.53 | 0.96 | 0.01803 |
| POLR1B | -0.29 | 0.76 | -1.05 | 0.01807 |
| CCNI2 | -3.1 | -1.25 | -1.85 | 0.01806 |
| RAP1GDS1 | 1.13 | 1.98 | -0.86 | 0.01815 |
| ITGA4 | 4.21 | 5.22 | -1.01 | 0.01815 |
| TRBV5-4 | -0.12 | 1.58 | -1.7 | 0.01816 |
| ARRB2 | 5.62 | 4.99 | 0.62 | 0.01816 |
| IGHV3-7 | 2.09 | 3.12 | -1.03 | 0.01819 |
| LITAF | 6.04 | 4.82 | 1.22 | 0.0182 |
| RP11-231E4.5 | 0.42 | 1.51 | -1.09 | 0.01821 |
| TXLNG | 0.78 | 1.74 | -0.97 | 0.01821 |
| CACTIN | -0.07 | 0.81 | -0.89 | 0.01823 |
| MYO1E | -0.09 | 0.98 | -1.07 | 0.01822 |
| TOMM70A | 1.96 | 2.81 | -0.85 | 0.01818 |
| CD74 | 6.65 | 7.26 | -0.61 | 0.01827 |
| PAOX | -0.71 | 0.37 | -1.07 | 0.01827 |
| RP11-573G6.9 | -1.96 | -0.32 | -1.64 | 0.01828 |
| IFITM10 | -0.8 | -2.1 | 1.3 | 0.01838 |
| RPS3AP43 | 1.9 | 0.37 | 1.53 | 0.01837 |
| ALAD | 0.64 | 1.81 | -1.17 | 0.01837 |
| ZNF121 | 2 | 2.9 | -0.91 | 0.01835 |
| RUVBL2 | 0.64 | 1.45 | -0.81 | 0.01836 |
| CD300LB | 4.8 | 4.19 | 0.6 | 0.01834 |
| MRM1 | -0.22 | 0.86 | -1.07 | 0.01836 |
| RPAP1 | -0.35 | 0.64 | -0.99 | 0.01833 |
| FARSA | 1.06 | 1.88 | -0.82 | 0.01835 |
| DNHD1 | -1.27 | -0.07 | -1.21 | 0.0184 |
| ARMC3 | -3.99 | -2.09 | -1.91 | 0.01842 |
| CISD1 | -0.7 | 0.44 | -1.14 | 0.01843 |
| PHC1 | -0.82 | 0.4 | -1.21 | 0.01843 |
| HSPA13 | 2.27 | 3.04 | -0.77 | 0.01846 |
| NPM1P37 | 3.27 | 2.66 | 0.62 | 0.01852 |
| RP11-812I20.2 | -0.63 | 1.28 | -1.92 | 0.01854 |
| BTF3 | 3.89 | 4.61 | -0.72 | 0.01854 |
| RAB3D | 6.79 | 5.95 | 0.84 | 0.0185 |
| RP11-358L22.3 | -0.42 | 0.55 | -0.98 | 0.01851 |
| LARP1 | 3.1 | 3.78 | -0.68 | 0.01862 |
| AC109333.10 | -2.63 | -0.97 | -1.66 | 0.01861 |
| FCMR | 3.18 | 4.01 | -0.83 | 0.01863 |
| TRAM1 | 4.52 | 5.28 | -0.76 | 0.01856 |
| RPA1 | 2.05 | 2.82 | -0.77 | 0.01855 |
| RP11-797A18.5 | 0.2 | 1.38 | -1.18 | 0.01858 |
| RPL32 | 3.67 | 4.39 | -0.72 | 0.01863 |
| MT-CO3 | 8.19 | 9.19 | -1.01 | 0.01859 |
| RPAIN | 0.93 | 1.74 | -0.81 | 0.0186 |
| CAMK1 | -0.02 | 0.92 | -0.94 | 0.01862 |
| RILPL2 | 3.74 | 3.12 | 0.61 | 0.01862 |
| RRP7A | 2.34 | 3.05 | -0.72 | 0.01869 |
| PKD1P5 | -0.19 | 0.84 | -1.04 | 0.01866 |
| NDUFB1 | 2.36 | 1.34 | 1.02 | 0.01867 |
| PKD1 | -0.65 | 0.5 | -1.15 | 0.01869 |
| DDX10 | 0.17 | 1.24 | -1.07 | 0.01867 |
| FAM161A | -4.07 | -2.13 | -1.94 | 0.01868 |
| RHOH | 0.96 | 1.95 | -1 | 0.0187 |
| ZNF777 | 1.39 | 2.18 | -0.78 | 0.01878 |
| NUDT19 | 0.99 | 1.88 | -0.9 | 0.01875 |
| ZSWIM6 | 4.36 | 3.79 | 0.57 | 0.01876 |
| RBL1 | 1.66 | 2.54 | -0.87 | 0.01881 |
| BMI1 | 1.41 | 2.48 | -1.07 | 0.01874 |
| UBE3D | -1.37 | 0.21 | -1.58 | 0.01875 |
| GOT2 | 0.9 | 1.8 | -0.9 | 0.01882 |
| TDP1 | 0.39 | 1.28 | -0.88 | 0.01881 |
| RFX3-AS1 | -0.01 | 1.01 | -1.02 | 0.0188 |
| POMGNT2 | -1.11 | 0.24 | -1.34 | 0.01878 |
| CH17-373J23.1 | 2.19 | 3.34 | -1.15 | 0.01876 |
| RP11-658F2.8 | 2.7 | 3.36 | -0.66 | 0.01877 |
| RP11-1099M24.9 | -1.53 | -3.43 | 1.9 | 0.01873 |
| RP11-392P7.1 | -2.48 | -0.76 | -1.73 | 0.01886 |
| ESYT2 | 3.46 | 4.22 | -0.76 | 0.01887 |
| SPATA5 | 0.73 | 1.79 | -1.07 | 0.0189 |
| RP11-134L10.1 | 5.61 | 4.58 | 1.03 | 0.01896 |
| AC104634.3 | -0.77 | 1.16 | -1.93 | 0.01897 |
| SLAIN1 | -0.4 | 0.61 | -1.02 | 0.01896 |
| TRIM16L | -4.24 | -2.15 | -2.09 | 0.01897 |
| TVP23C-CDRT4 | -0.65 | 0.93 | -1.58 | 0.0189 |
| BEX4 | 0.58 | 1.64 | -1.06 | 0.01892 |
| RBM38 | 4.6 | 6.32 | -1.72 | 0.01891 |
| GPR18 | 0.35 | 1.31 | -0.96 | 0.01891 |
| CAND1 | 1.71 | 2.54 | -0.82 | 0.01896 |
| SLC16A3 | 4.2 | 3.39 | 0.81 | 0.01895 |
| WDR81 | 0.99 | 1.8 | -0.81 | 0.01901 |
| GNA11 | -3.72 | -1.78 | -1.94 | 0.01899 |
| MRPL37 | 1.85 | 2.58 | -0.72 | 0.01905 |
| TRBV7-3 | 0.32 | 1.29 | -0.98 | 0.01906 |
| CH507-42P11.8 | -0.25 | 0.72 | -0.97 | 0.01906 |
| UBBP2 | 0.24 | 1.45 | -1.21 | 0.01903 |
| AC108004.3 | 0.11 | 1.18 | -1.08 | 0.01904 |
| TRBV21-1 | -0.44 | 1.38 | -1.83 | 0.01904 |
| RP11-616M17.1 | -0.34 | 0.76 | -1.1 | 0.01917 |
| NIPAL3 | 1.43 | 2.57 | -1.14 | 0.01913 |
| GYPB | 1.1 | 2.62 | -1.52 | 0.0191 |
| NOL9 | 1.88 | 2.66 | -0.78 | 0.01915 |
| AP000254.8 | -0.94 | 0.3 | -1.24 | 0.0191 |
| C16orf91 | -0.14 | 0.96 | -1.1 | 0.01912 |
| PPFIA1 | 2.72 | 2.11 | 0.61 | 0.01919 |
| CCDC153 | 0.1 | -1.11 | 1.2 | 0.01918 |
| C9orf16 | 1.34 | 2.17 | -0.83 | 0.01915 |
| SLC6A6 | 4.65 | 3.94 | 0.71 | 0.01911 |
| RN7SKP283 | -0.99 | 0.6 | -1.59 | 0.01916 |
| C10orf2 | -0.1 | 0.95 | -1.05 | 0.01913 |
| H1FX | 3.32 | 4.26 | -0.94 | 0.01918 |
| LRCH1 | 1.12 | 1.93 | -0.81 | 0.01927 |
| TTN-AS1 | 1.64 | 0.91 | 0.73 | 0.01924 |
| SUCLG2 | 2.67 | 3.48 | -0.8 | 0.01927 |
| BIRC3 | 2.71 | 3.34 | -0.62 | 0.01926 |
| CHST14 | -0.7 | 0.3 | -1 | 0.01928 |
| IDSP1 | 3.06 | 2.12 | 0.93 | 0.0193 |
| USP45 | -0.81 | 0.4 | -1.21 | 0.01932 |
| ARPC2 | 5.68 | 5.02 | 0.66 | 0.0194 |
| KLF7-IT1 | 3.19 | 2.55 | 0.64 | 0.01941 |
| ORC5 | 0.81 | 1.67 | -0.86 | 0.01933 |
| RP11-1277A3.2 | 2.02 | 2.67 | -0.65 | 0.01942 |
| ESAM | -0.79 | 0.72 | -1.51 | 0.01944 |
| DAG1 | -4 | -1.18 | -2.81 | 0.01943 |
| P2RY10 | 2.72 | 3.5 | -0.77 | 0.01939 |
| MCF2L | -3.51 | -1.87 | -1.63 | 0.01944 |
| CCDC88C | 2.87 | 3.64 | -0.77 | 0.01935 |
| AC011899.9 | 2.39 | 1.25 | 1.14 | 0.01942 |
| RP11-65L3.4 | 3.86 | 3.3 | 0.56 | 0.01942 |
| OSGEP | 0.74 | 1.61 | -0.87 | 0.01943 |
| METTL15 | -0.29 | 0.62 | -0.92 | 0.0194 |
| PARP4 | 6.09 | 5.43 | 0.66 | 0.01935 |
| CDR2 | 1.34 | 2.26 | -0.92 | 0.01943 |
| AC084290.2 | 4.98 | 4.13 | 0.86 | 0.01947 |
| ANKRD31 | -3.23 | -1.55 | -1.68 | 0.01952 |
| RP11-693M3.1 | -0.99 | 0.27 | -1.26 | 0.01953 |
| APPL1 | 2.47 | 3.26 | -0.78 | 0.01958 |
| FAM19A2 | 1.3 | 0.38 | 0.92 | 0.01962 |
| SRA1 | 2.18 | 1.51 | 0.67 | 0.0196 |
| CTD-3236F5.1 | 1.28 | 2.44 | -1.15 | 0.01958 |
| CLEC1B | -2.06 | -0.1 | -1.96 | 0.01962 |
| CDC42BPG | -1.08 | -0.03 | -1.05 | 0.01959 |
| MTMR10 | 4.04 | 3.5 | 0.54 | 0.0196 |
| PDGFA | -1.39 | -0.11 | -1.28 | 0.01959 |
| PAM | 1.77 | 0.59 | 1.18 | 0.01964 |
| CDKAL1 | 1.93 | 2.8 | -0.87 | 0.01967 |
| TSC22D1-AS1 | -1.69 | -0.31 | -1.38 | 0.01966 |
| COL13A1 | -2.09 | -4.39 | 2.3 | 0.01967 |
| WDR3 | 0.35 | 1.41 | -1.06 | 0.01967 |
| SGF29 | 1 | 1.89 | -0.89 | 0.01972 |
| PLOD1 | 2.97 | 2.19 | 0.78 | 0.01973 |
| FAM159A | 0.96 | 2.11 | -1.15 | 0.01969 |
| ECHS1 | 2.01 | 2.9 | -0.89 | 0.0197 |
| FAM83G | -1.27 | 0.03 | -1.31 | 0.01969 |
| AC016831.7 | -0.99 | -2.46 | 1.47 | 0.01973 |
| ZNF789 | -1.3 | -0.05 | -1.24 | 0.01978 |
| FAM104A | 3.99 | 4.78 | -0.79 | 0.01979 |
| LUZP1 | 0.45 | 1.34 | -0.89 | 0.01977 |
| CD63 | 3.84 | 3.28 | 0.57 | 0.01981 |
| SLC6A4 | -4.03 | -2.01 | -2.02 | 0.01984 |
| UBE2G2 | 2 | 2.76 | -0.76 | 0.01989 |
| MCL1 | 7.85 | 7.25 | 0.6 | 0.01994 |
| NHLRC4 | -3.67 | -1.35 | -2.32 | 0.01992 |
| UBE2O | 2.25 | 2.99 | -0.74 | 0.01991 |
| KRBOX4 | 0.38 | 1.22 | -0.84 | 0.01989 |
| TMEM40 | -1.7 | -0.1 | -1.61 | 0.01994 |
| RP2 | 4.96 | 4.38 | 0.58 | 0.01987 |
| SPG20 | 2.15 | 1.49 | 0.67 | 0.01986 |
| NAPSB | 1.52 | 2.28 | -0.76 | 0.01994 |
| ZNF480 | -0.28 | 0.9 | -1.18 | 0.01989 |
| TOB2 | 2.76 | 3.41 | -0.65 | 0.01996 |
| HCG9 | -0.11 | -2.06 | 1.95 | 0.02003 |
| NSUN5P2 | 0.37 | 1.42 | -1.05 | 0.02011 |
| RP1-253P7.1 | -0.34 | 0.78 | -1.12 | 0.02006 |
| ANO10 | 1.74 | 0.91 | 0.82 | 0.02011 |
| RP13-516M14.10 | 2.53 | 1.59 | 0.94 | 0.02 |
| ZNHIT6 | 0.68 | 1.64 | -0.96 | 0.02007 |
| TRPV2 | 2.69 | 3.38 | -0.68 | 0.02008 |
| C12orf42 | -1.68 | -0.32 | -1.36 | 0.02004 |
| UBE2J1 | 4.54 | 5.23 | -0.68 | 0.02002 |
| TAF1A | -0.16 | 0.99 | -1.15 | 0.02002 |
| WDR27 | -0.43 | 0.77 | -1.2 | 0.02003 |
| TNK1 | -3.32 | -1.62 | -1.7 | 0.02005 |
| HSPH1 | 0.48 | 1.53 | -1.05 | 0.02012 |
| GTF2H4 | -0.34 | 0.73 | -1.07 | 0.02008 |
| SETP9 | -1.17 | 0.8 | -1.98 | 0.02005 |
| AC007969.5 | 2.96 | 4.09 | -1.13 | 0.02 |
| NEMP1 | 0.47 | 1.69 | -1.22 | 0.02009 |
| NSG1 | -2.37 | -0.76 | -1.61 | 0.01997 |
| AF131215.3 | 1.14 | 2.27 | -1.13 | 0.02012 |
| PLPPR2 | 3.59 | 2.78 | 0.81 | 0.02007 |
| MX2 | 5.04 | 4.25 | 0.79 | 0.01999 |
| RP11-497G19.7 | -2.92 | -1.25 | -1.68 | 0.02017 |
| RP11-382J24.2 | 1.46 | 2.46 | -1 | 0.02016 |
| ARMC1 | 1.02 | 1.86 | -0.84 | 0.02017 |
| RN7SL653P | 0.69 | 2.27 | -1.58 | 0.02016 |
| NPM3 | -0.57 | 0.41 | -0.98 | 0.02029 |
| LINC01136 | 1.16 | -0.46 | 1.62 | 0.02028 |
| KRR1 | 1.24 | 2.1 | -0.86 | 0.02027 |
| C5AR2 | 4.73 | 3.99 | 0.74 | 0.02023 |
| ARSG | 3.23 | 2.67 | 0.56 | 0.0203 |
| TMEM102 | 0.62 | 1.52 | -0.9 | 0.02025 |
| CARKD | 1.17 | 2 | -0.83 | 0.02028 |
| TAF4B | -0.72 | 0.28 | -1 | 0.02025 |
| PRR12 | 1.94 | 2.66 | -0.72 | 0.02021 |
| RPL14P1 | 5.33 | 6.14 | -0.81 | 0.02029 |
| HSD17B8 | -0.87 | 0.65 | -1.52 | 0.02021 |
| STX1A | -3.03 | -1.23 | -1.8 | 0.02028 |
| MTCO1P2 | -2.57 | -1.01 | -1.56 | 0.02031 |
| L3HYPDH | -0.35 | 0.58 | -0.92 | 0.02036 |
| PWP2 | 0.01 | 0.92 | -0.91 | 0.02035 |
| SMPD4 | 0.16 | 1.05 | -0.89 | 0.02032 |
| TDRD9 | 0.33 | -1.14 | 1.47 | 0.02034 |
| RELL1 | 5.29 | 4.61 | 0.69 | 0.02036 |
| FMR1-IT1 | 0.53 | 1.44 | -0.91 | 0.02039 |
| SNRPB | 3.6 | 4.17 | -0.57 | 0.02041 |
| TNPO3 | 4.25 | 3.62 | 0.63 | 0.02039 |
| AL928654.7 | -2.59 | -0.11 | -2.48 | 0.02044 |
| ZDHHC24 | 0.97 | 1.82 | -0.85 | 0.02045 |
| NEURL1 | -1.26 | 0.1 | -1.36 | 0.02042 |
| DNAJC11 | 0.73 | 1.52 | -0.79 | 0.02045 |
| SERPINB9 | 4.43 | 5.08 | -0.65 | 0.02044 |
| RCN1 | -0.96 | 0.05 | -1.01 | 0.02049 |
| IPO11 | -0.03 | 1.03 | -1.05 | 0.02051 |
| AZU1 | 1.36 | -1.03 | 2.39 | 0.02049 |
| LSM4 | 0.41 | 1.27 | -0.85 | 0.0205 |
| FIZ1 | -0.95 | 0.18 | -1.13 | 0.02052 |
| MTHFD1 | -0.11 | 0.94 | -1.05 | 0.02057 |
| RP11-417L19.6 | 1.91 | 2.96 | -1.05 | 0.02055 |
| NUDCD1 | 0.4 | 1.4 | -1 | 0.02058 |
| GTPBP4 | 1.11 | 1.94 | -0.83 | 0.02053 |
| FCRL5 | -1.07 | 0.46 | -1.53 | 0.02055 |
| ZMYND11 | 0.86 | 1.63 | -0.77 | 0.02058 |
| TRBC1 | 4.97 | 5.88 | -0.91 | 0.02057 |
| RP11-196G11.4 | 3.44 | 2.72 | 0.72 | 0.02062 |
| ZNF101P2 | 0.32 | 1.23 | -0.9 | 0.0206 |
| HLA-W | 2.06 | 1.23 | 0.83 | 0.02062 |
| ATG9B | -3.76 | -1.15 | -2.61 | 0.02063 |
| CRTC1 | 1.01 | 1.73 | -0.73 | 0.02067 |
| UPRT | -0.53 | 0.65 | -1.18 | 0.02066 |
| RP11-523H20.3 | 1.02 | 2.06 | -1.04 | 0.02064 |
| EIF3K | 3 | 3.58 | -0.58 | 0.0207 |
| HSP90B1 | 3.7 | 4.41 | -0.71 | 0.02075 |
| NELFCD | 0.69 | 1.47 | -0.78 | 0.02074 |
| CD46 | 4.94 | 4.37 | 0.57 | 0.02074 |
| AC104653.1 | -0.79 | 0.91 | -1.7 | 0.02074 |
| RTKN2 | -1.95 | -0.16 | -1.79 | 0.02088 |
| DENND4C | 2.31 | 3.09 | -0.78 | 0.02094 |
| LLNLR-260G6.1 | 2.18 | 1.41 | 0.76 | 0.02092 |
| CTD-2207P18.2 | -0.23 | -1.76 | 1.53 | 0.02091 |
| SFXN1 | 1.09 | 1.98 | -0.9 | 0.02086 |
| NUP205 | 2.02 | 2.83 | -0.81 | 0.02093 |
| DMTN | 4.17 | 5.2 | -1.03 | 0.02094 |
| TRAV14DV4 | 2.12 | 3.29 | -1.17 | 0.02083 |
| PGM2 | 3.95 | 3.39 | 0.56 | 0.02095 |
| TMEM140 | 6.87 | 6.11 | 0.75 | 0.02089 |
| PHLDB3 | -1.38 | -0.14 | -1.23 | 0.02077 |
| CEP68 | 0.74 | 1.51 | -0.76 | 0.02085 |
| CTD-2561B21.8 | -0.35 | 1.05 | -1.41 | 0.02096 |
| IMP4 | 0.29 | 1.13 | -0.84 | 0.02077 |
| PCYT1B | -2.02 | -0.51 | -1.51 | 0.02081 |
| RP11-348F1.3 | -1.15 | 0.59 | -1.74 | 0.02083 |
| SLC30A4 | -0.56 | 0.56 | -1.12 | 0.02089 |
| TELO2 | 0.34 | 1.29 | -0.95 | 0.0208 |
| RTN4IP1 | -0.35 | 0.67 | -1.02 | 0.02084 |
| POLR3A | 1.26 | 2.07 | -0.81 | 0.02095 |
| TRBV12-4 | 0.16 | 2.38 | -2.21 | 0.02088 |
| TP53RK | 1.62 | 2.49 | -0.87 | 0.0209 |
| MRPS28 | -0.91 | 0.12 | -1.03 | 0.0209 |
| BLK | 0.91 | 1.8 | -0.89 | 0.02081 |
| TMEM156 | 0.95 | 1.78 | -0.83 | 0.02098 |
| EIF2S1 | 1.79 | 2.59 | -0.79 | 0.02101 |
| GPR183 | 3.43 | 4.52 | -1.08 | 0.02104 |
| MTX1 | 3.02 | 2.22 | 0.8 | 0.02103 |
| HIST1H4E | 3.95 | 4.74 | -0.8 | 0.02104 |
| LRR1 | -0.69 | 0.32 | -1.01 | 0.02104 |
| ZNF831 | 2.78 | 3.6 | -0.82 | 0.02112 |
| NUS1 | 2.62 | 3.36 | -0.74 | 0.02111 |
| CCDC88B | 3.96 | 3.41 | 0.55 | 0.0211 |
| BRI3BP | 1.96 | 2.64 | -0.67 | 0.02115 |
| LMF1 | -0.29 | 0.62 | -0.9 | 0.02114 |
| RRS1-AS1 | -1.93 | -0.56 | -1.36 | 0.02116 |
| LINC00667 | 0.49 | 1.38 | -0.89 | 0.02118 |
| CCDC109B | 1.93 | 2.79 | -0.86 | 0.02125 |
| GAPDHP62 | 1.37 | 2.32 | -0.95 | 0.02121 |
| ASLP1 | 1.39 | 0.61 | 0.78 | 0.02122 |
| AKR7A2 | 0.71 | 1.62 | -0.91 | 0.02122 |
| SMARCAD1 | 0.95 | 1.84 | -0.89 | 0.02124 |
| ARL14EP | 1.18 | 2.15 | -0.97 | 0.0212 |
| LAT2 | 4.28 | 3.6 | 0.69 | 0.02125 |
| TRIM32 | -0.5 | 0.76 | -1.26 | 0.0213 |
| ITGB1 | 3.48 | 4.3 | -0.82 | 0.02127 |
| RALGAPA2 | 4.79 | 4.15 | 0.64 | 0.02128 |
| HEBP2 | 4.02 | 3.46 | 0.56 | 0.02127 |
| GATA1 | 2.71 | 3.71 | -0.99 | 0.02132 |
| RP11-1023L17.1 | 1.17 | 2 | -0.83 | 0.02132 |
| BACE2 | -1.79 | -0.5 | -1.29 | 0.02136 |
| ZNF891 | 0.49 | 1.37 | -0.88 | 0.02134 |
| UBAP2 | 0.96 | 1.7 | -0.74 | 0.02137 |
| EXOSC9 | 0.46 | 1.39 | -0.93 | 0.02133 |
| CLU | 0.88 | 2.12 | -1.24 | 0.02135 |
| RP11-327P2.5 | 1.89 | 0.87 | 1.01 | 0.02144 |
| PLXDC2 | 5.07 | 4.37 | 0.71 | 0.02145 |
| AC079325.6 | 0.49 | 1.66 | -1.17 | 0.02143 |
| STX2 | 1.66 | 2.43 | -0.76 | 0.02142 |
| POLR1D | 1.37 | 2.1 | -0.73 | 0.02144 |
| FBXO41 | -0.6 | 0.34 | -0.95 | 0.02139 |
| TUBD1 | -0.45 | 0.45 | -0.9 | 0.02139 |
| ATG16L2 | 5.12 | 4.55 | 0.57 | 0.02145 |
| IQCC | -3.62 | -1.84 | -1.79 | 0.02151 |
| AEN | 0.03 | 0.86 | -0.84 | 0.02149 |
| RP11-676J12.4 | -1.85 | -0.58 | -1.27 | 0.02148 |
| DNAJB4 | -0.16 | 0.81 | -0.97 | 0.02147 |
| PRKCA | 1.84 | 2.74 | -0.9 | 0.02151 |
| ELP2 | 0.87 | 1.79 | -0.92 | 0.02153 |
| TAF6L | -0.4 | 0.5 | -0.89 | 0.02152 |
| KLHL32 | -3.27 | -1.75 | -1.52 | 0.02149 |
| VPS51 | 1.25 | 2.03 | -0.78 | 0.02155 |
| ICMT | 0.73 | 1.6 | -0.87 | 0.02154 |
| SEPHS1 | 0.26 | 1.21 | -0.95 | 0.02157 |
| DNM2 | 4.17 | 3.65 | 0.52 | 0.02161 |
| TCEA1P2 | 4.01 | 4.65 | -0.63 | 0.02161 |
| NSUN6 | 1.15 | 1.98 | -0.83 | 0.02163 |
| RP4-545C24.1 | -0.54 | 0.79 | -1.34 | 0.02164 |
| MTMR8 | -0.58 | 0.41 | -0.98 | 0.02167 |
| NSMF | 0.35 | 1.23 | -0.88 | 0.02171 |
| COG7 | 0.95 | 1.7 | -0.76 | 0.02172 |
| MSRA | 1.58 | 0.85 | 0.73 | 0.02167 |
| FAM3C | 0.49 | 1.56 | -1.07 | 0.02171 |
| TSSK3 | -3.07 | -1.42 | -1.65 | 0.02171 |
| NT5DC1 | 1.34 | 2.13 | -0.79 | 0.02169 |
| DENND2C | -3.26 | -1.66 | -1.6 | 0.0217 |
| HPS4 | 0.41 | 1.22 | -0.8 | 0.02177 |
| RP11-505E24.3 | -0.45 | -1.99 | 1.54 | 0.02174 |
| ADAM9 | 1.25 | 0.45 | 0.81 | 0.02175 |
| AGAP6 | 0.8 | 1.59 | -0.79 | 0.02176 |
| FABP7P1 | -0.72 | 0.81 | -1.53 | 0.02175 |
| SLFN5 | 4.22 | 5.27 | -1.05 | 0.02189 |
| TUBBP1 | -1.07 | 0.34 | -1.42 | 0.02183 |
| MXI1 | 2.27 | 3 | -0.73 | 0.0219 |
| EFHC2 | 0.26 | 1.33 | -1.07 | 0.0218 |
| UPP1 | 3.18 | 2.38 | 0.81 | 0.02183 |
| FAM160A2 | 3.6 | 2.91 | 0.68 | 0.02189 |
| FBXW2 | 4.16 | 3.56 | 0.6 | 0.02189 |
| RP11-34P13.16 | 6.48 | 5.5 | 0.98 | 0.02189 |
| NBPF15 | 1.21 | 2.14 | -0.93 | 0.02189 |
| CBFB | 1.76 | 2.43 | -0.68 | 0.02182 |
| FAM98B | 1.24 | 2.16 | -0.92 | 0.02184 |
| ZDHHC21 | 1.48 | 2.43 | -0.96 | 0.02191 |
| FCGBP | -0.45 | 0.87 | -1.32 | 0.0218 |
| RGS10 | 2.49 | 3.47 | -0.98 | 0.02188 |
| LL21NC02-1C16.1 | -0.98 | 0.65 | -1.63 | 0.02189 |
| CA5B | 1.1 | 2.06 | -0.96 | 0.02196 |
| TUBGCP5 | 0 | 0.93 | -0.92 | 0.02194 |
| BICD2 | 4.66 | 4.14 | 0.52 | 0.02199 |
| C3orf62 | 3.45 | 2.67 | 0.78 | 0.02197 |
| OFD1 | 2.34 | 3.21 | -0.88 | 0.02194 |
| LINC01420 | 0.92 | 1.93 | -1.01 | 0.02197 |
| TMEM106B | 1.89 | 2.66 | -0.77 | 0.02195 |
| CSNK1D | 3.6 | 2.99 | 0.61 | 0.02198 |
| CLEC6A | 1.03 | -0.13 | 1.16 | 0.02203 |
| PSMD3 | 2.14 | 2.74 | -0.6 | 0.02201 |
| ZBTB42 | -0.72 | 0.56 | -1.29 | 0.02202 |
| RP11-46H11.12 | -0.1 | -1.64 | 1.54 | 0.02205 |
| CTD-2319I12.4 | -2.82 | -0.78 | -2.04 | 0.02206 |
| AC068522.4 | 1.46 | 0.4 | 1.06 | 0.02208 |
| EXOSC10 | 1.59 | 2.4 | -0.81 | 0.0221 |
| HGD | -1.73 | -0.52 | -1.21 | 0.02212 |
| CASP4 | 4.98 | 4.29 | 0.69 | 0.02211 |
| ABHD10 | 1.21 | 2.05 | -0.85 | 0.02216 |
| FUBP1 | 3.45 | 4.21 | -0.76 | 0.02214 |
| UBAP1L | 0.54 | 1.44 | -0.9 | 0.02217 |
| RP11-1094M14.5 | 3.61 | 4.49 | -0.89 | 0.02232 |
| TARSL2 | 0.99 | 1.87 | -0.89 | 0.02232 |
| LINC01012 | -3.1 | -1.61 | -1.48 | 0.02226 |
| TSPAN18 | -0.86 | 0.97 | -1.83 | 0.02234 |
| CHEK2 | -1.31 | -0.18 | -1.13 | 0.02228 |
| RP11-95D17.1 | -0.28 | 0.74 | -1.02 | 0.02225 |
| GORASP2 | 1.14 | 1.99 | -0.85 | 0.02223 |
| ZNF71 | -1.35 | 0.53 | -1.87 | 0.02227 |
| ADCY9 | 0.45 | 1.36 | -0.91 | 0.02232 |
| ERI3 | 0.45 | 1.38 | -0.93 | 0.02221 |
| DHRS12 | 2.96 | 2.23 | 0.73 | 0.02228 |
| DNAJA4 | 0.33 | 1.32 | -0.99 | 0.02231 |
| AHSA1 | 1.39 | 2.11 | -0.72 | 0.02228 |
| LYZ | 9.76 | 9.03 | 0.73 | 0.02229 |
| PRKCD | 5.93 | 5.32 | 0.61 | 0.02232 |
| RP4-564F22.7 | 0.34 | 1.37 | -1.04 | 0.02234 |
| RP11-256L6.2 | 1.23 | 0.38 | 0.85 | 0.02239 |
| NBPF3 | -1.48 | 0.02 | -1.51 | 0.02238 |
| RP11-442P12.2 | 1.98 | 1 | 0.98 | 0.02243 |
| FCGR2A | 6.39 | 5.63 | 0.76 | 0.02246 |
| CDC27 | 2.48 | 3.13 | -0.65 | 0.02248 |
| RP11-326C3.12 | 1.66 | 0.43 | 1.23 | 0.02248 |
| RP11-216B9.8 | -2.15 | -0.46 | -1.69 | 0.02249 |
| WASF3 | -3.05 | -1.27 | -1.78 | 0.02247 |
| AIDA | 0.42 | 1.37 | -0.94 | 0.0225 |
| DDX10P1 | 2.62 | 1.84 | 0.78 | 0.02252 |
| NUCB2 | 0.82 | 1.56 | -0.74 | 0.02253 |
| RP4-635E18.7 | -1.17 | -0.08 | -1.1 | 0.02252 |
| TRIM35 | 1.62 | 2.47 | -0.86 | 0.02254 |
| PER3 | -2.24 | -0.88 | -1.36 | 0.02256 |
| HDGF | 3.58 | 4.34 | -0.75 | 0.02258 |
| PLEKHA1 | 0.6 | 1.5 | -0.9 | 0.0226 |
| ULK4P3 | -1.56 | -3.59 | 2.03 | 0.02266 |
| PITPNA-AS1 | 0.42 | 1.39 | -0.97 | 0.02268 |
| NR2C2AP | -1.91 | -0.49 | -1.42 | 0.0227 |
| PTCD3 | 1.6 | 2.45 | -0.85 | 0.02269 |
| ATG4C | 1.61 | 2.36 | -0.75 | 0.02268 |
| OSBPL2 | 3.14 | 2.57 | 0.56 | 0.02267 |
| MTND6P5 | 4.31 | 3.55 | 0.76 | 0.02269 |
| UBN1 | 4.66 | 3.85 | 0.81 | 0.02273 |
| DLG3 | -2.81 | -1.17 | -1.64 | 0.02273 |
| ZBED5-AS1 | 0.76 | 1.54 | -0.78 | 0.02285 |
| PDCD7 | 1.98 | 2.73 | -0.75 | 0.02283 |
| PANK1 | -2.91 | -1.38 | -1.53 | 0.0228 |
| ALG9 | -0.6 | 0.54 | -1.15 | 0.02288 |
| KIF18A | -1.3 | -0.08 | -1.22 | 0.02284 |
| MRPS26 | 1.58 | 2.3 | -0.72 | 0.02278 |
| PINK1-AS | 0.84 | 1.62 | -0.78 | 0.02285 |
| LETM1 | 0.8 | 1.69 | -0.89 | 0.0228 |
| SNX22 | -1.34 | -0.21 | -1.13 | 0.02286 |
| PAICS | -0.37 | 0.6 | -0.97 | 0.02287 |
| HIST2H3D | 3.39 | 2.13 | 1.26 | 0.02279 |
| NKRF | -0.36 | 0.58 | -0.94 | 0.02281 |
| SERPINB1 | 6.11 | 5.47 | 0.64 | 0.02285 |
| SGPP2 | -2.56 | -0.48 | -2.08 | 0.02283 |
| AKAP11 | 3.13 | 3.96 | -0.84 | 0.02279 |
| TBC1D16 | -3.75 | -2.02 | -1.73 | 0.02291 |
| VAV3 | 3.25 | 2.67 | 0.59 | 0.0229 |
| TMEM2 | 3.66 | 3.04 | 0.62 | 0.02295 |
| SIPA1L3 | 1.73 | 2.44 | -0.71 | 0.02295 |
| SLC25A43 | -0.28 | 0.6 | -0.88 | 0.02294 |
| IDH2 | 2.81 | 3.47 | -0.66 | 0.02296 |
| C1orf216 | -0.52 | 0.53 | -1.05 | 0.02301 |
| CTD-2192J16.15 | 7.42 | 8.38 | -0.96 | 0.02303 |
| PMEPA1 | -2.1 | -0.83 | -1.26 | 0.02305 |
| GPHN | -1.17 | -0.08 | -1.09 | 0.02307 |
| COX10-AS1 | -0.45 | 0.62 | -1.07 | 0.02308 |
| EZR | 3.73 | 4.57 | -0.84 | 0.02306 |
| CYB5A | -1.5 | -0.1 | -1.4 | 0.02314 |
| ZNF594 | 0.36 | 1.33 | -0.97 | 0.02313 |
| RP11-632C17__A.1 | 4.72 | 5.54 | -0.83 | 0.02315 |
| CLIC2 | 0.13 | 1.17 | -1.04 | 0.02312 |
| ADGRG5 | 0.53 | 1.78 | -1.25 | 0.02319 |
| NCBP1 | 2.5 | 3.23 | -0.73 | 0.02318 |
| RP11-47G11.2 | 5.42 | 4.76 | 0.66 | 0.02317 |
| TMEM109 | 1.69 | 2.54 | -0.85 | 0.02318 |
| RP11-222K16.2 | -0.06 | 1.24 | -1.3 | 0.0232 |
| LRRC6 | 1.43 | 0.03 | 1.4 | 0.02327 |
| RP11-175P13.2 | 0.5 | -0.56 | 1.06 | 0.02326 |
| LPP-AS2 | 1.42 | 0.28 | 1.14 | 0.02325 |
| ITK | 3.01 | 3.73 | -0.72 | 0.02323 |
| SLC48A1 | 0.82 | 1.84 | -1.01 | 0.02336 |
| MSMO1 | 0.81 | 1.71 | -0.9 | 0.02338 |
| VAPA | 4.04 | 3.41 | 0.63 | 0.02339 |
| RP11-445F6.2 | -1.85 | 0.16 | -2.01 | 0.02333 |
| NDUFB9 | 1.06 | 1.78 | -0.72 | 0.02329 |
| GDF7 | -4.12 | -1.43 | -2.69 | 0.02332 |
| FUBP3 | 1.85 | 2.54 | -0.69 | 0.02336 |
| TCTN2 | -2.48 | -0.84 | -1.63 | 0.02331 |
| ZNF467 | 4.95 | 4.18 | 0.77 | 0.0234 |
| PPIL1 | 0.98 | 1.86 | -0.88 | 0.02328 |
| ANKRD37 | -0.87 | -2.51 | 1.63 | 0.02332 |
| IGFBP4 | -1.04 | 0.48 | -1.52 | 0.02333 |
| GOLGA8B | 0.29 | 1.67 | -1.37 | 0.02339 |
| ETS2 | 4.67 | 3.99 | 0.68 | 0.02341 |
| TXLNA | 2.69 | 3.38 | -0.69 | 0.02349 |
| RP5-1050D4.5 | 0.91 | 1.65 | -0.75 | 0.02347 |
| ZNF717 | -0.33 | 1.18 | -1.52 | 0.02346 |
| TOMM40L | -1.63 | -0.42 | -1.21 | 0.02346 |
| PAIP2B | -0.4 | 0.53 | -0.93 | 0.02348 |
| MAEA | 2.44 | 1.76 | 0.68 | 0.02352 |
| SVIL | 4.61 | 4 | 0.61 | 0.02352 |
| TPD52L2 | 4.88 | 4.3 | 0.58 | 0.02352 |
| GBA | 2.86 | 2.23 | 0.63 | 0.02357 |
| ENOPH1 | 0.12 | 1.1 | -0.98 | 0.0236 |
| SVIP | 1.02 | 1.92 | -0.89 | 0.02376 |
| ZNF829 | -1.56 | -0.24 | -1.32 | 0.02375 |
| ZBED1 | 2.81 | 1.61 | 1.2 | 0.02374 |
| EIF5A | 2.27 | 3.08 | -0.81 | 0.02366 |
| RN7SKP296 | 3.21 | 2.41 | 0.8 | 0.02377 |
| MRPL36 | -1.32 | -0.07 | -1.25 | 0.02376 |
| MRPS27 | 0.38 | 1.26 | -0.88 | 0.02371 |
| C16orf52 | 0.07 | 1.27 | -1.2 | 0.02367 |
| RP11-432J22.2 | 0.83 | 1.68 | -0.86 | 0.02368 |
| FBXO21 | 0.39 | 1.3 | -0.91 | 0.02367 |
| TMEM161A | -1.94 | -0.7 | -1.24 | 0.02374 |
| FAF1 | 1.48 | 2.3 | -0.81 | 0.02371 |
| ALG3 | -0.5 | 0.47 | -0.98 | 0.02374 |
| METRNL | 3.68 | 3.01 | 0.66 | 0.0237 |
| FARS2 | 1.6 | 2.48 | -0.87 | 0.02378 |
| RPN2 | 3.39 | 3.99 | -0.6 | 0.02381 |
| RP11-513I15.6 | -1.46 | -3.08 | 1.62 | 0.0238 |
| PM20D2 | 1.29 | 2.11 | -0.82 | 0.02385 |
| HAUS2 | -1.04 | 0.08 | -1.12 | 0.02385 |
| KB-1507C5.4 | 2.56 | 1.27 | 1.29 | 0.02385 |
| RP11-334C17.5 | 0.65 | 1.51 | -0.87 | 0.02389 |
| WBSCR16 | 0.64 | 1.49 | -0.85 | 0.0239 |
| NPM1 | 2.88 | 3.59 | -0.72 | 0.02395 |
| FCF1P1 | 2.15 | 1.4 | 0.74 | 0.02393 |
| RIOK1 | 0.86 | 1.62 | -0.76 | 0.02395 |
| KBTBD7 | 4.04 | 3.34 | 0.71 | 0.02401 |
| CEP290 | 0.19 | 1.19 | -1 | 0.02398 |
| CAMTA1 | -1.3 | -0.22 | -1.08 | 0.02403 |
| C14orf1 | 1.07 | 1.89 | -0.83 | 0.02401 |
| CAPN5 | -0.65 | 0.49 | -1.13 | 0.02402 |
| CLCC1 | 1.19 | 2.02 | -0.84 | 0.02401 |
| RNPEP | 2.49 | 3.2 | -0.71 | 0.02406 |
| BCL2L1 | 5.13 | 6.3 | -1.18 | 0.02404 |
| ANKRD28 | 1.1 | 2.06 | -0.95 | 0.02413 |
| FPGS | -0.58 | 0.44 | -1.02 | 0.02416 |
| AC007318.5 | 2.63 | 3.29 | -0.66 | 0.02415 |
| RP11-102N12.3 | -0.37 | 0.55 | -0.91 | 0.02415 |
| C1orf162 | 4.56 | 3.88 | 0.68 | 0.02414 |
| GNG7 | 1.05 | 2.08 | -1.03 | 0.02414 |
| AC010492.2 | 0.8 | -0.82 | 1.62 | 0.0241 |
| LAS1L | 1.21 | 1.99 | -0.77 | 0.02419 |
| RNF146 | 2.48 | 1.85 | 0.63 | 0.02413 |
| AL592183.1 | 2.47 | 3.06 | -0.59 | 0.02411 |
| KLHL25 | -1.73 | -0.46 | -1.28 | 0.02417 |
| HIVEP3 | -1.56 | -0.14 | -1.42 | 0.02413 |
| NPHP3 | 0.58 | 1.56 | -0.98 | 0.02413 |
| SLC43A1 | -0.26 | 0.74 | -1 | 0.02422 |
| AC007038.7 | 1.9 | 2.69 | -0.79 | 0.02425 |
| RP11-337N6.3 | -0.68 | 0.59 | -1.27 | 0.02428 |
| RP1-232L22__B.1 | 3.34 | 2.58 | 0.76 | 0.02428 |
| HIST1H3PS1 | 0.23 | -0.89 | 1.12 | 0.02427 |
| C2orf61 | -1.01 | -2.75 | 1.74 | 0.02434 |
| HIST2H4A | 4.11 | 3.35 | 0.75 | 0.02432 |
| NDUFC2 | 0.87 | 1.73 | -0.86 | 0.02432 |
| RPL14 | 1.84 | 2.6 | -0.77 | 0.02432 |
| AC133528.2 | 0.5 | 1.98 | -1.48 | 0.02439 |
| RRAS2 | -0.36 | 0.71 | -1.07 | 0.02439 |
| RP11-45M22.2 | 2.68 | 3.42 | -0.74 | 0.02438 |
| CNOT11 | 2.87 | 3.48 | -0.61 | 0.02436 |
| CELF2 | 4.86 | 4.3 | 0.56 | 0.02438 |
| CHIC2 | 4.41 | 3.89 | 0.52 | 0.02454 |
| CYSTM1 | 3.73 | 2.84 | 0.89 | 0.02444 |
| GSTP1 | 2.88 | 3.49 | -0.61 | 0.0245 |
| AFAP1 | -1.51 | -0.36 | -1.15 | 0.02451 |
| RP5-1184F4.7 | -1.63 | -0.36 | -1.27 | 0.02451 |
| PHF19 | 0.61 | 1.58 | -0.97 | 0.02452 |
| TMX2 | 1.5 | 2.48 | -0.99 | 0.02453 |
| ATP2B4 | 3.07 | 3.98 | -0.91 | 0.02443 |
| LIMK2 | 5.06 | 4.3 | 0.77 | 0.02453 |
| CA13 | -0.96 | 0.07 | -1.03 | 0.02453 |
| FITM2 | 0.38 | 1.38 | -0.99 | 0.02444 |
| C10orf10 | -3.92 | -2.04 | -1.89 | 0.02453 |
| IBA57 | 0.01 | 0.9 | -0.89 | 0.02447 |
| RN7SKP292 | 3.57 | 2.96 | 0.6 | 0.02451 |
| ARF1 | 4.37 | 3.5 | 0.87 | 0.02454 |
| SOCS2-AS1 | -2.74 | -1.34 | -1.39 | 0.02462 |
| ELP4 | 0.82 | 1.77 | -0.95 | 0.02459 |
| COQ4 | 0.68 | 1.53 | -0.86 | 0.02461 |
| NOB1 | 1.12 | 2 | -0.88 | 0.02471 |
| SCARNA9 | 4.91 | 3.83 | 1.08 | 0.02471 |
| ST3GAL3 | -0.78 | 0.17 | -0.95 | 0.0247 |
| GYPA | -0.5 | 1.02 | -1.53 | 0.02471 |
| KLC3 | -1.53 | 0.03 | -1.56 | 0.02474 |
| FKBP14 | -1.97 | -0.31 | -1.66 | 0.02478 |
| SELP | 1.18 | 2.14 | -0.96 | 0.02481 |
| ZHX1-C8orf76 | -0.5 | 0.39 | -0.9 | 0.02482 |
| AC013474.4 | 1.19 | 2.07 | -0.88 | 0.02486 |
| TIMM44 | -0.73 | 0.25 | -0.98 | 0.02486 |
| MTATP6P11 | 3.26 | 2.65 | 0.61 | 0.02487 |
| MRPS34 | 0.94 | 1.78 | -0.83 | 0.02489 |
| FLNA | 5.86 | 6.59 | -0.72 | 0.025 |
| HACE1 | -1.02 | 0.03 | -1.05 | 0.02503 |
| IMPAD1 | 2.58 | 3.27 | -0.69 | 0.02505 |
| INSIG1 | 1.17 | 2.06 | -0.89 | 0.02493 |
| RP11-212I21.4 | 3.27 | 2.53 | 0.73 | 0.02494 |
| SIGLEC8 | -2.76 | -1.05 | -1.7 | 0.02502 |
| NCR3 | 0.79 | 2.16 | -1.37 | 0.02496 |
| SELM | -2.58 | -1.04 | -1.54 | 0.02504 |
| RP11-815I9.4 | 0.74 | 1.44 | -0.7 | 0.02499 |
| NDEL1 | 4.44 | 3.8 | 0.64 | 0.02496 |
| TGM3 | 1.79 | 0.04 | 1.75 | 0.02501 |
| ZDHHC18 | 6.06 | 5.42 | 0.64 | 0.02504 |
| HSH2D | 3.55 | 2.71 | 0.84 | 0.02505 |
| SNRPA | 1.26 | 1.92 | -0.66 | 0.02501 |
| GOLGA3 | 1.96 | 2.69 | -0.73 | 0.02492 |
| RPL12P16 | 6.4 | 7.11 | -0.71 | 0.02512 |
| FAM177B | -0.44 | -1.65 | 1.21 | 0.02511 |
| SLC39A14 | -2.49 | -1.1 | -1.38 | 0.02513 |
| TRIM74 | -3.02 | -0.94 | -2.08 | 0.02511 |
| AGO4 | 5.7 | 5.13 | 0.58 | 0.02521 |
| MRPL30 | 0.11 | 1.04 | -0.93 | 0.02522 |
| UBR5-AS1 | 4.55 | 3.88 | 0.67 | 0.0252 |
| CTD-2336O2.1 | 1.01 | 2.02 | -1.02 | 0.02519 |
| URGCP | -0.52 | 0.5 | -1.02 | 0.02515 |
| SPTAN1 | 2.73 | 3.56 | -0.82 | 0.02524 |
| SNX8 | -0.66 | 0.37 | -1.03 | 0.02516 |
| AC093838.4 | 1.85 | 2.63 | -0.78 | 0.02522 |
| CASP1 | 5.18 | 4.55 | 0.63 | 0.02516 |
| IBTK | 0.83 | 1.74 | -0.91 | 0.02524 |
| CTC-429P9.3 | 1.91 | 2.54 | -0.64 | 0.02524 |
| PARK2 | -2.98 | -1.53 | -1.45 | 0.02525 |
| RP11-455I9.1 | -1.65 | -0.47 | -1.17 | 0.02529 |
| MYL4 | 0.85 | 1.89 | -1.04 | 0.02534 |
| KATNBL1 | 3.32 | 2.71 | 0.6 | 0.02532 |
| GGA2 | 1.74 | 2.46 | -0.73 | 0.02541 |
| DPP3 | 0.19 | 0.98 | -0.79 | 0.02533 |
| ANKRD36BP2 | 0.04 | 1.24 | -1.2 | 0.02538 |
| LEPROTL1 | 3.23 | 4.04 | -0.81 | 0.02537 |
| EOMES | 1.28 | 2.26 | -0.98 | 0.02538 |
| EFCAB12 | -0.66 | -1.88 | 1.22 | 0.0254 |
| LILRA4 | -0.45 | 0.95 | -1.41 | 0.02535 |
| SYNJ2BP | 1.51 | 2.38 | -0.87 | 0.02535 |
| DIS3L | 0.49 | 1.4 | -0.91 | 0.02532 |
| HIST2H2BB | -1.16 | 0.43 | -1.59 | 0.02546 |
| AFAP1L2 | -2.13 | -0.9 | -1.22 | 0.02548 |
| ATP5G1 | 0.11 | 1 | -0.89 | 0.02551 |
| NNT-AS1 | -0.38 | 0.57 | -0.94 | 0.02574 |
| TNIK | 2.08 | 2.91 | -0.83 | 0.02569 |
| GEMIN5 | 1.08 | 1.94 | -0.85 | 0.02561 |
| IFNG-AS1 | -0.94 | 1.8 | -2.73 | 0.02581 |
| IGF2BP2 | 1.75 | 3.01 | -1.25 | 0.02585 |
| LINC00926 | 1.97 | 2.76 | -0.79 | 0.02553 |
| RPUSD3 | -0.47 | 0.46 | -0.93 | 0.02578 |
| POLR3E | 0.32 | 1.21 | -0.89 | 0.02582 |
| ALDH1B1 | -0.81 | 0.36 | -1.16 | 0.02583 |
| DCAF16 | 2.58 | 3.33 | -0.75 | 0.02565 |
| KHDRBS2 | -1.86 | -0.73 | -1.14 | 0.02573 |
| TTC26 | -0.55 | -2.04 | 1.49 | 0.02567 |
| IGLV1-40 | 1.44 | 2.67 | -1.24 | 0.02567 |
| GLI4 | -0.35 | 0.68 | -1.03 | 0.02583 |
| NOP58 | 1.87 | 2.71 | -0.84 | 0.02557 |
| RP11-380N8.7 | -1.63 | -0.13 | -1.5 | 0.02558 |
| TNFSF13B | 3.49 | 2.72 | 0.77 | 0.02562 |
| RP11-147L13.15 | 2 | 2.71 | -0.71 | 0.0258 |
| TMC8 | 3.57 | 4.22 | -0.66 | 0.0257 |
| FAM120C | -0.44 | 0.52 | -0.96 | 0.02558 |
| ST20-AS1 | 1.62 | 0.58 | 1.05 | 0.02562 |
| MDM2 | 3.14 | 2.41 | 0.74 | 0.0258 |
| KLHL42 | 0.61 | 1.49 | -0.88 | 0.02586 |
| RP11-168J18.6 | 1.41 | 0.57 | 0.83 | 0.02569 |
| ANKLE1 | -3.68 | -1.83 | -1.84 | 0.02573 |
| CD7 | 1.83 | 2.63 | -0.79 | 0.02576 |
| EXOC2 | 2.82 | 3.51 | -0.69 | 0.02586 |
| RPA4 | -1.06 | -0.07 | -0.98 | 0.02586 |
| ESD | 1.95 | 2.72 | -0.77 | 0.02585 |
| DAAM1 | -0.02 | 0.85 | -0.87 | 0.0258 |
| C12orf4 | 0.52 | 1.38 | -0.86 | 0.02564 |
| BAHD1 | 0.32 | 1.21 | -0.89 | 0.0258 |
| PGAM5 | 0.1 | 1.05 | -0.94 | 0.0256 |
| CENPH | -2.1 | -0.89 | -1.21 | 0.02565 |
| RP11-23P13.6 | -2.92 | -0.65 | -2.27 | 0.02575 |
| PNOC | -0.8 | 0.17 | -0.97 | 0.02569 |
| SULT1A1 | 1.81 | 1.11 | 0.69 | 0.02576 |
| DDX12P | -0.8 | 0.83 | -1.63 | 0.02554 |
| ELOF1 | 0.87 | 1.66 | -0.79 | 0.02565 |
| GTF2I | 0.82 | 1.62 | -0.8 | 0.02591 |
| MRC2 | -0.55 | 0.73 | -1.27 | 0.0259 |
| RN7SL552P | 1.72 | 0.75 | 0.97 | 0.02589 |
| CXorf57 | -1.4 | -0.3 | -1.1 | 0.0259 |
| SIRPA | 5.4 | 4.76 | 0.64 | 0.02591 |
| DCP1B | 0.47 | 1.39 | -0.92 | 0.02594 |
| SLC29A2 | -1.55 | -0.33 | -1.22 | 0.02603 |
| CFAP97 | 1 | 2.07 | -1.07 | 0.02604 |
| FAM60A | 1.36 | 2.1 | -0.74 | 0.02602 |
| BEND5 | -2.63 | -1.18 | -1.45 | 0.02603 |
| SQRDL | 4.19 | 3.51 | 0.67 | 0.02605 |
| ACAD9 | 0.56 | 1.35 | -0.79 | 0.02601 |
| TPP2 | 3.18 | 3.86 | -0.69 | 0.02605 |
| RQCD1 | 1.36 | 2.42 | -1.05 | 0.02605 |
| DPF3 | -3.02 | -1.62 | -1.4 | 0.02609 |
| LINC00987 | 0.43 | 1.79 | -1.37 | 0.02608 |
| IGLV3-9 | 0.07 | 1.81 | -1.74 | 0.02608 |
| EIF3E | 2.97 | 3.75 | -0.78 | 0.02611 |
| RP11-187C18.3 | -0.64 | 0.28 | -0.92 | 0.02621 |
| USP13 | -1.03 | 0.35 | -1.38 | 0.02631 |
| RN7SL688P | 0.09 | 1.48 | -1.39 | 0.0263 |
| MICAL3 | -0.17 | 0.66 | -0.83 | 0.02618 |
| SARDH | -2.76 | -1.2 | -1.56 | 0.02619 |
| CENPC | 2.16 | 2.91 | -0.75 | 0.02627 |
| NOP9 | 1.95 | 2.89 | -0.95 | 0.02635 |
| MRPS18B | 2.18 | 3 | -0.83 | 0.02636 |
| AC116366.5 | 5.49 | 4.53 | 0.97 | 0.02632 |
| ASH1L-IT1 | 0.44 | 1.34 | -0.9 | 0.02625 |
| ELAC2 | 0.42 | 1.31 | -0.89 | 0.02618 |
| TRAV24 | -0.14 | 0.85 | -0.99 | 0.02633 |
| CEP83 | -0.72 | 0.21 | -0.93 | 0.02634 |
| GCDH | -0.3 | 0.73 | -1.02 | 0.02634 |
| JAML | 6.61 | 6 | 0.61 | 0.02629 |
| NANP | -0.49 | 0.54 | -1.03 | 0.02634 |
| AFG3L2 | 1.31 | 2.03 | -0.72 | 0.02614 |
| ADAP2 | 0.49 | 1.3 | -0.81 | 0.02618 |
| PUM3 | 1.62 | 2.4 | -0.77 | 0.02615 |
| PAFAH1B3 | -0.06 | 0.84 | -0.9 | 0.02621 |
| RP11-305O6.3 | -1.17 | -2.79 | 1.62 | 0.02626 |
| PRDM11 | -1.15 | -0.15 | -1 | 0.02628 |
| ZNF714 | -1.52 | -0.26 | -1.27 | 0.0263 |
| SETDB2 | 1.31 | 2.09 | -0.78 | 0.02628 |
| TMEM19 | 0.71 | 1.49 | -0.79 | 0.02616 |
| EVI2B | 7.38 | 6.67 | 0.71 | 0.02637 |
| MDH2 | 2.07 | 2.73 | -0.66 | 0.02641 |
| IGHV3-11 | 0.73 | 1.99 | -1.26 | 0.02638 |
| RP5-1086K13.1 | 3.17 | 2.4 | 0.77 | 0.02639 |
| CR2 | -0.88 | 0.59 | -1.47 | 0.02645 |
| KCNC4 | -3.04 | -0.72 | -2.32 | 0.02647 |
| RP11-96D1.9 | 2.45 | 3.25 | -0.79 | 0.02642 |
| EXOSC8 | 0.77 | 1.62 | -0.86 | 0.02643 |
| C3orf18 | -2.21 | -0.82 | -1.39 | 0.02647 |
| LINC00494 | -1.51 | -0.25 | -1.26 | 0.02645 |
| PAFAH2 | 1.33 | 2.13 | -0.8 | 0.02659 |
| QPCTL | -1.11 | -0.11 | -1.01 | 0.02671 |
| XPO7 | 3.51 | 4.08 | -0.57 | 0.02666 |
| AC074289.1 | 4.26 | 3.55 | 0.72 | 0.0267 |
| FUT11 | 1.74 | 2.48 | -0.74 | 0.02665 |
| SLC16A1-AS1 | -0.93 | 0.16 | -1.09 | 0.02673 |
| CALM3 | 2.75 | 3.43 | -0.68 | 0.02667 |
| NCF2 | 8 | 7.34 | 0.66 | 0.02672 |
| B9D2 | 2.07 | 1.33 | 0.74 | 0.02667 |
| ENGASE | 1.17 | 2.11 | -0.94 | 0.02667 |
| HIST1H2AE | 5.18 | 5.69 | -0.52 | 0.02673 |
| POLE3 | 2.47 | 3.06 | -0.59 | 0.0268 |
| RP1-102G20.2 | -0.6 | 1.24 | -1.85 | 0.02677 |
| GALNT14 | -0.23 | -1.63 | 1.39 | 0.02679 |
| USF1P1 | 3.18 | 2.35 | 0.83 | 0.0268 |
| COA1 | 2.63 | 1.83 | 0.8 | 0.02678 |
| PLIN5 | 2.33 | 1.05 | 1.28 | 0.02682 |
| AC016739.2 | 5.94 | 6.54 | -0.6 | 0.0269 |
| PPP2R3C | 2.39 | 1.46 | 0.93 | 0.02684 |
| MSH2 | 0.91 | 1.86 | -0.95 | 0.02686 |
| ECSIT | 0.08 | 0.87 | -0.79 | 0.02683 |
| PDE4DIP | -0.47 | 0.51 | -0.98 | 0.02687 |
| AF131215.2 | 1.26 | 2.56 | -1.3 | 0.0269 |
| CDYL | 1.58 | 2.18 | -0.6 | 0.02691 |
| ZNF667-AS1 | -3.63 | -1.41 | -2.22 | 0.02687 |
| PKD1P1 | -1.05 | 0.09 | -1.14 | 0.02687 |
| CCND3 | 3.46 | 2.88 | 0.57 | 0.02694 |
| ZNF175 | 0.24 | 1.22 | -0.98 | 0.02693 |
| RPL37A | 2.91 | 3.64 | -0.73 | 0.02702 |
| MTERF3 | 0.15 | 1.08 | -0.94 | 0.027 |
| RP11-482G13.1 | 6.24 | 5.32 | 0.92 | 0.02697 |
| RP11-705O1.8 | -1.38 | 0.02 | -1.4 | 0.02699 |
| RP11-165D7.5 | 2.37 | 1.67 | 0.7 | 0.02702 |
| RP11-213G2.1 | 0.85 | -0.29 | 1.14 | 0.027 |
| AFF2 | 1.09 | 0.07 | 1.02 | 0.02698 |
| DCAF12 | 6.94 | 8.02 | -1.08 | 0.02699 |
| AP006285.2 | -3.86 | -1.51 | -2.35 | 0.02708 |
| EIF2D | 0.81 | 1.66 | -0.85 | 0.02713 |
| CCDC120 | -2.86 | -1.45 | -1.41 | 0.02713 |
| ZNF680P1 | -2.77 | -1.05 | -1.72 | 0.02711 |
| AP000320.7 | -1.38 | -2.71 | 1.33 | 0.02709 |
| METTL13 | 0.99 | 1.74 | -0.75 | 0.02714 |
| SLC35E1P1 | -0.87 | 0.34 | -1.21 | 0.02719 |
| LONP1 | 0.62 | 1.43 | -0.8 | 0.02721 |
| MNDA | 9.39 | 8.68 | 0.72 | 0.02726 |
| OSBPL9 | 2.81 | 2.21 | 0.6 | 0.02725 |
| IGHV4-34 | 2.1 | 3.18 | -1.08 | 0.02725 |
| ZCCHC6 | 5.6 | 5.07 | 0.53 | 0.02728 |
| AC129492.6 | -1.23 | -0.1 | -1.13 | 0.02729 |
| RP3-508I15.18 | 2.8 | 1.88 | 0.92 | 0.0273 |
| AC240274.1 | -1.26 | 0.32 | -1.58 | 0.02743 |
| RP11-380G5.2 | 4.01 | 3.41 | 0.6 | 0.02731 |
| AQP1 | -2.79 | -0.88 | -1.91 | 0.02744 |
| EXT2 | 0.63 | 1.44 | -0.82 | 0.02739 |
| SAMM50 | 1.04 | 1.78 | -0.74 | 0.02734 |
| RFXAP | 1.08 | 1.79 | -0.71 | 0.02744 |
| DDB2 | -0.29 | 0.63 | -0.93 | 0.02745 |
| KIF22 | 0.85 | 1.73 | -0.88 | 0.02743 |
| SH3BGRL | 5.1 | 5.67 | -0.57 | 0.02741 |
| MRPS2 | -0.73 | 0.25 | -0.97 | 0.02737 |
| RPL7L1P9 | -1.06 | 0.61 | -1.68 | 0.02735 |
| CCDC125 | 2.38 | 1.68 | 0.71 | 0.0274 |
| UBE2E2 | -0.17 | 0.67 | -0.84 | 0.02733 |
| TAF8 | 2.74 | 1.96 | 0.78 | 0.02739 |
| RP11-797D24.3 | -0.49 | 0.78 | -1.27 | 0.02742 |
| LDOC1L | 1.65 | 2.5 | -0.85 | 0.02745 |
| KB-1460A1.5 | 0.73 | 1.63 | -0.9 | 0.02741 |
| IKBIP | 3.92 | 3.31 | 0.62 | 0.02749 |
| C20orf197 | 2.31 | 1.55 | 0.77 | 0.02753 |
| RP11-282O18.3 | -0.45 | -1.84 | 1.39 | 0.02758 |
| RAP2B | 4.22 | 4.78 | -0.57 | 0.02757 |
| TMEM206 | 0.72 | 1.55 | -0.83 | 0.02758 |
| TSHZ1 | 0.33 | 1.22 | -0.89 | 0.0276 |
| CAPN2 | 3.21 | 3.91 | -0.7 | 0.0276 |
| METTL2B | 0.29 | 1.19 | -0.9 | 0.02756 |
| ADAM22 | -2.21 | -0.65 | -1.56 | 0.02757 |
| PDK3 | 4.51 | 3.96 | 0.55 | 0.0277 |
| RN7SL500P | 0 | 1.82 | -1.82 | 0.02766 |
| RP4-673D20.3 | 2.8 | 2.01 | 0.79 | 0.02768 |
| DTX1 | -1.16 | 0.31 | -1.46 | 0.02767 |
| FAM157B | 1.71 | 0.54 | 1.17 | 0.02769 |
| NEK1 | 0.23 | 1.03 | -0.8 | 0.02767 |
| FAM69A | 0.49 | 1.4 | -0.91 | 0.02764 |
| TEN1 | -1.72 | -0.45 | -1.27 | 0.02763 |
| IGHV3-48 | 1.86 | 2.68 | -0.82 | 0.0277 |
| DGAT2 | 3.95 | 3.03 | 0.92 | 0.02776 |
| DISP1 | -1.38 | -0.22 | -1.15 | 0.02778 |
| TBC1D22B | 2.89 | 3.56 | -0.67 | 0.02774 |
| YEATS4 | -0.3 | 0.59 | -0.89 | 0.02773 |
| SDAD1P2 | -2.57 | -0.85 | -1.72 | 0.02777 |
| KDM4C | 2.06 | 2.9 | -0.84 | 0.02779 |
| AC008984.7 | 2.44 | 1.49 | 0.95 | 0.02779 |
| NUP43 | 2.1 | 2.81 | -0.71 | 0.02775 |
| XKR6 | -1.18 | -0.03 | -1.15 | 0.028 |
| CUZD1 | -1.98 | -0.73 | -1.24 | 0.02798 |
| HIST2H2BF | 4.81 | 4.13 | 0.68 | 0.02801 |
| CHI3L1 | 4.47 | 3.55 | 0.92 | 0.02795 |
| RAD50 | 1.59 | 2.33 | -0.74 | 0.02787 |
| MTX3 | 0.61 | 1.49 | -0.88 | 0.02786 |
| STAG3L4 | 1.46 | 2.15 | -0.69 | 0.02786 |
| SLC4A1 | 4.61 | 5.86 | -1.25 | 0.02792 |
| SHPK | 0.55 | 1.63 | -1.08 | 0.02794 |
| PLXNC1 | 6.43 | 5.79 | 0.64 | 0.02801 |
| DDX54 | 1.05 | 1.78 | -0.72 | 0.02783 |
| RP5-1065J22.8 | 0.8 | -0.73 | 1.52 | 0.02782 |
| OPA1 | 1.76 | 2.42 | -0.67 | 0.0279 |
| CPSF6 | 3.28 | 3.94 | -0.65 | 0.02785 |
| ABCG2 | -2.01 | -0.69 | -1.32 | 0.02799 |
| PLAU | -0.87 | -2.09 | 1.23 | 0.02796 |
| NBAS | 2.22 | 2.93 | -0.72 | 0.02788 |
| SH3YL1 | -0.69 | 0.22 | -0.91 | 0.02793 |
| HSD17B11 | 5.83 | 5.27 | 0.56 | 0.02793 |
| FAHD2CP | -1.44 | -0.3 | -1.14 | 0.02794 |
| PIGP | -1.3 | -0.28 | -1.02 | 0.02789 |
| MAN1C1 | -0.21 | 0.93 | -1.14 | 0.02791 |
| ARHGAP35 | 1.27 | 2.1 | -0.84 | 0.02799 |
| SLAMF6 | 3.31 | 4.17 | -0.85 | 0.02805 |
| TRIM65 | 1.02 | 1.89 | -0.87 | 0.02804 |
| AC007950.2 | 0.24 | -0.72 | 0.96 | 0.02807 |
| GAREM2 | -2.66 | -1.29 | -1.37 | 0.02812 |
| HPS1 | 3.03 | 3.66 | -0.63 | 0.02812 |
| PKHD1L1 | -2.1 | -0.56 | -1.54 | 0.0281 |
| RPS15 | 3.12 | 3.84 | -0.73 | 0.02815 |
| CTC-378H22.2 | -0.72 | 0.49 | -1.2 | 0.02816 |
| SNORA73A | 3.63 | -0.07 | 3.7 | 0.02822 |
| LINC00398 | 1.1 | 0 | 1.1 | 0.02822 |
| CTC-453G23.7 | -0.25 | 0.83 | -1.08 | 0.02828 |
| DHRS7B | 1.26 | 0.53 | 0.72 | 0.02827 |
| TCEA3 | -1.1 | 0.06 | -1.16 | 0.02831 |
| RP11-380M21.3 | 2.97 | 3.66 | -0.69 | 0.02834 |
| FUOM | -0.8 | 0.36 | -1.16 | 0.02836 |
| TTC34 | -0.01 | 1.02 | -1.03 | 0.02841 |
| UBTD2 | 0.72 | 1.47 | -0.75 | 0.02842 |
| PCYOX1L | 0.72 | 1.67 | -0.95 | 0.0284 |
| RP11-34F20.7 | -0.86 | -2.11 | 1.25 | 0.0284 |
| HYI | -2.3 | -1.01 | -1.3 | 0.02847 |
| SNX5 | 1.28 | 2.04 | -0.76 | 0.02846 |
| FDX1 | 0.83 | 1.83 | -1 | 0.02846 |
| SLC16A7 | -0.67 | 0.79 | -1.45 | 0.0285 |
| TACSTD2 | -1.24 | -3.14 | 1.91 | 0.02849 |
| SLC39A6 | 2.26 | 2.85 | -0.59 | 0.02851 |
| TEP1 | 2.72 | 3.3 | -0.58 | 0.02857 |
| RP11-785H5.2 | 1.89 | 2.81 | -0.92 | 0.02856 |
| ARMCX6 | -1.11 | -0.05 | -1.06 | 0.02861 |
| HTATSF1 | 1.33 | 2.13 | -0.8 | 0.02861 |
| RABGAP1L | 3.01 | 3.6 | -0.59 | 0.0286 |
| RGL3 | -1.45 | -2.76 | 1.31 | 0.02864 |
| TUBG1 | -0.66 | 0.26 | -0.92 | 0.02869 |
| EXOSC2 | 0.72 | 1.55 | -0.83 | 0.02868 |
| FAM35BP | -0.02 | 0.92 | -0.94 | 0.02874 |
| NAF1 | 0.26 | 1.12 | -0.85 | 0.02874 |
| ANKRD23 | -2.11 | -0.9 | -1.2 | 0.02874 |
| C9orf142 | 0.2 | 1.17 | -0.97 | 0.02879 |
| ZFYVE16 | 3.22 | 2.51 | 0.71 | 0.0288 |
| SLC35E1 | 0.62 | 1.4 | -0.78 | 0.02877 |
| CD84 | 2.16 | 2.88 | -0.73 | 0.02879 |
| AC012368.1 | 2.6 | 1.55 | 1.06 | 0.02886 |
| TOX | 1.06 | 2.11 | -1.04 | 0.02889 |
| USP5 | 1.31 | 2.03 | -0.72 | 0.02886 |
| PPM1K | 1.53 | 2.35 | -0.82 | 0.02888 |
| FAM20B | 2.35 | 3.09 | -0.74 | 0.02888 |
| ACRBP | 0.83 | 1.67 | -0.84 | 0.02914 |
| PHF14 | 0.56 | 1.43 | -0.87 | 0.02907 |
| DUSP19 | -2.28 | -1.07 | -1.21 | 0.02902 |
| UTP14A | 0.42 | 1.27 | -0.85 | 0.02917 |
| GTF2IP1 | 5.28 | 4.74 | 0.54 | 0.02911 |
| S100A11 | 8.8 | 8.05 | 0.75 | 0.02896 |
| MBNL2 | 1.81 | 2.63 | -0.83 | 0.02907 |
| USP20 | 2.05 | 2.62 | -0.57 | 0.02919 |
| PTK2 | -1.68 | -0.56 | -1.12 | 0.02904 |
| HBA2 | 7.95 | 9.47 | -1.53 | 0.02924 |
| SCLY | -1.12 | -0.13 | -0.98 | 0.02913 |
| MINA | 0.11 | 1.04 | -0.92 | 0.029 |
| AAK1 | 2.9 | 3.63 | -0.73 | 0.02919 |
| FAM153B | -2.25 | -0.96 | -1.29 | 0.0292 |
| CCT7 | 2.42 | 3.02 | -0.59 | 0.02898 |
| RP11-392O17.2 | -1.93 | -0.75 | -1.18 | 0.02902 |
| GPATCH2 | 0.55 | 1.39 | -0.84 | 0.02907 |
| GTF3C4 | 0.85 | 1.71 | -0.87 | 0.02899 |
| CELSR2 | -2.49 | -1.2 | -1.29 | 0.02915 |
| COPS2 | 1.82 | 2.58 | -0.76 | 0.02907 |
| TPD52 | -0.82 | 0.25 | -1.07 | 0.02905 |
| ATF5 | -0.75 | 0.41 | -1.16 | 0.02909 |
| RNF8 | -1.29 | -0.17 | -1.12 | 0.02923 |
| GLRX | 4.12 | 3.42 | 0.7 | 0.02918 |
| RGS6 | -2.54 | -1.09 | -1.45 | 0.02923 |
| SETP3 | -1.84 | -0.19 | -1.65 | 0.02924 |
| KDSR | -0.5 | 0.6 | -1.11 | 0.02893 |
| TSPAN9 | -1.82 | -0.44 | -1.38 | 0.02905 |
| ELOVL4 | -2.23 | -0.46 | -1.78 | 0.02923 |
| CYB5RL | -1.72 | -0.57 | -1.15 | 0.02919 |
| RP11-563N6.6 | 3.4 | 2.68 | 0.71 | 0.0291 |
| RFX7 | 1.2 | 2.17 | -0.97 | 0.02896 |
| ZZZ3 | 0.59 | 1.49 | -0.9 | 0.02894 |
| PCED1A | 1.93 | 2.73 | -0.79 | 0.02914 |
| RP11-415F23.2 | 3.27 | 4.3 | -1.03 | 0.02914 |
| UPK3A | -1.77 | -0.38 | -1.39 | 0.02927 |
| XRCC6 | 4 | 4.62 | -0.62 | 0.02926 |
| NIPSNAP3B | -2.38 | -0.61 | -1.77 | 0.02931 |
| CKMT2-AS1 | -1.44 | -0.4 | -1.04 | 0.02933 |
| RP11-1334A24.5 | 2.15 | 1.48 | 0.66 | 0.02931 |
| CALM2 | 4.84 | 4.33 | 0.51 | 0.02932 |
| EBAG9 | 0.04 | 0.85 | -0.82 | 0.02937 |
| NME4 | -1.27 | -0.2 | -1.07 | 0.02937 |
| RILPL1 | 0.65 | -0.26 | 0.91 | 0.02948 |
| CNNM2 | -0.85 | 0.47 | -1.33 | 0.0295 |
| CTD-2215E18.1 | -0.22 | 0.89 | -1.1 | 0.02949 |
| RP11-63N8.3 | 1.56 | 0.37 | 1.19 | 0.02944 |
| GABBR1 | 0.61 | 1.45 | -0.84 | 0.0294 |
| LIX1L | 3.63 | 4.21 | -0.58 | 0.02941 |
| CTD-2555A7.2 | -1.28 | -2.82 | 1.54 | 0.02949 |
| BIVM | -1.06 | 0.04 | -1.1 | 0.02941 |
| AC113404.1 | 4.28 | 4.83 | -0.55 | 0.0294 |
| METTL1 | -3.49 | -1.77 | -1.72 | 0.02945 |
| RP11-264B17.3 | -0.57 | 0.6 | -1.16 | 0.02949 |
| MRPL42 | 0.32 | 1.2 | -0.88 | 0.02949 |
| GPAM | -0.43 | 0.48 | -0.92 | 0.02942 |
| MZT1 | 0.23 | 1.21 | -0.97 | 0.02953 |
| RP11-12J10.4 | -1.84 | -0.07 | -1.77 | 0.02957 |
| CD2AP | 2.16 | 3.02 | -0.85 | 0.02961 |
| RP11-295M3.2 | 0.33 | 1.12 | -0.79 | 0.02959 |
| TOMM20 | 3.27 | 3.86 | -0.59 | 0.02964 |
| MTERF4 | 0.17 | 1.1 | -0.94 | 0.02967 |
| ZNF322P1 | -2.68 | -1.35 | -1.33 | 0.02966 |
| MXD4 | 2.41 | 3.15 | -0.74 | 0.02972 |
| AQP9 | 7.08 | 6.33 | 0.75 | 0.02971 |
| ARV1 | -0.13 | 0.87 | -1 | 0.02974 |
| FGFRL1 | -1.3 | -0.23 | -1.07 | 0.0297 |
| PSMD14 | 0.22 | 1.08 | -0.85 | 0.02971 |
| PDIK1L | -0.65 | 0.34 | -0.99 | 0.02975 |
| ZNF525 | -1.77 | 0.47 | -2.24 | 0.02979 |
| TGFBR3 | 1 | 1.98 | -0.98 | 0.02977 |
| RP11-327F22.6 | 4.58 | 3.54 | 1.04 | 0.02986 |
| CTD-2020K17.3 | -2.46 | -1.15 | -1.32 | 0.02984 |
| WDR86 | -4.33 | -2.09 | -2.24 | 0.02991 |
| TAS2R4 | 0.69 | 1.81 | -1.11 | 0.02984 |
| FKBP3 | 1.43 | 2.32 | -0.89 | 0.02989 |
| CD163 | 3.18 | 2.38 | 0.8 | 0.02988 |
| SREK1IP1 | 1.25 | 1.92 | -0.67 | 0.02989 |
| TRAF3IP2 | -0.57 | 0.53 | -1.1 | 0.02981 |
| EHBP1 | 0.14 | 1.03 | -0.88 | 0.02988 |
| POLR3C | 1.98 | 2.56 | -0.59 | 0.02982 |
| AC005682.5 | -0.62 | 0.31 | -0.93 | 0.02987 |
| YIF1A | -0.32 | 0.68 | -1 | 0.02992 |
| ZNF280C | -0.02 | 0.84 | -0.85 | 0.02997 |
| ATP1A3 | -2.53 | -0.8 | -1.73 | 0.03009 |
| MEST | -1.78 | -0.58 | -1.2 | 0.03005 |
| RABL3 | 0.08 | 1.07 | -0.99 | 0.03004 |
| RN7SKP110 | 1.06 | 1.85 | -0.79 | 0.03007 |
| RPS12 | 6.38 | 7.06 | -0.69 | 0.03005 |
| DDIT3 | 1.15 | 0.26 | 0.9 | 0.03004 |
| EGFL7 | -3.06 | -1.45 | -1.61 | 0.03005 |
| SLFNL1-AS1 | -0.84 | 0.36 | -1.2 | 0.03007 |
| C1orf56 | -1.46 | -0.16 | -1.3 | 0.03013 |
| RP11-47I22.2 | -0.72 | -2.1 | 1.38 | 0.03011 |
| NDUFB8P2 | 0.68 | -0.59 | 1.27 | 0.03014 |
| APOA1BP | 0.88 | 1.7 | -0.82 | 0.03016 |
| PHF12 | 3.24 | 2.72 | 0.52 | 0.03016 |
| BLMH | 0.3 | 1.31 | -1 | 0.03026 |
| ASAH1 | 4.97 | 4.42 | 0.55 | 0.03028 |
| CLEC17A | 0.87 | 1.81 | -0.94 | 0.03029 |
| NDST1 | 3.46 | 2.71 | 0.76 | 0.03027 |
| CA8 | -2.75 | -1.36 | -1.38 | 0.0303 |
| VWA9 | -0.62 | 0.33 | -0.95 | 0.03028 |
| HDHD3 | 0.15 | 1.01 | -0.85 | 0.03032 |
| THAP7 | -0.79 | 0.12 | -0.92 | 0.03034 |
| RP11-958N24.1 | -0.16 | 0.8 | -0.95 | 0.03038 |
| COBLL1 | -1.31 | -0.21 | -1.1 | 0.0304 |
| ZNF483 | -0.48 | 0.59 | -1.07 | 0.03045 |
| SLC40A1 | 5.16 | 4.52 | 0.65 | 0.03043 |
| TCERG1 | 1.24 | 2.03 | -0.79 | 0.03049 |
| DNAJC16 | -0.1 | 0.8 | -0.89 | 0.03048 |
| SIDT1 | 1.38 | 2.25 | -0.87 | 0.03052 |
| SERTAD1 | 0.73 | 1.61 | -0.88 | 0.03052 |
| RP11-185E8.2 | -2.07 | -0.62 | -1.45 | 0.03052 |
| LINC00996 | -2.06 | -0.36 | -1.7 | 0.0305 |
| CTD-2530H12.2 | 4.17 | 3.09 | 1.08 | 0.03053 |
| HNRNPA1L2 | 1.29 | 2.2 | -0.91 | 0.03056 |
| SP3 | 4.86 | 4.28 | 0.58 | 0.03056 |
| ULK4P1 | -3.16 | -0.98 | -2.18 | 0.03057 |
| CEP250 | 0.76 | 1.47 | -0.71 | 0.03061 |
| KLF4 | 0.35 | 1.12 | -0.77 | 0.0306 |
| RP11-257O5.2 | 1.7 | 2.65 | -0.95 | 0.03077 |
| MRPL50 | 1.49 | 2.29 | -0.8 | 0.03078 |
| ZNF776 | 3.54 | 2.95 | 0.59 | 0.03077 |
| CSE1L | 2.76 | 3.39 | -0.63 | 0.03079 |
| SETP14 | 2.1 | 2.72 | -0.61 | 0.03077 |
| ALPK1 | 4.31 | 3.71 | 0.61 | 0.03073 |
| BZRAP1 | 0.01 | 1.05 | -1.05 | 0.03075 |
| RP11-11N7.5 | 1.64 | 2.47 | -0.83 | 0.03074 |
| ADAMTS7P4 | -4.02 | -2.27 | -1.75 | 0.0307 |
| DAGLA | -2.83 | -1.38 | -1.45 | 0.03073 |
| SMG1P7 | 0.2 | 1.27 | -1.07 | 0.03074 |
| COL6A1 | -2.83 | -1.2 | -1.62 | 0.03073 |
| NARS2 | 0.11 | 1.03 | -0.92 | 0.0308 |
| RPP38 | -0.96 | 0.07 | -1.03 | 0.03092 |
| AC093375.1 | -3.91 | -2.11 | -1.8 | 0.0309 |
| PHLPP2 | -0.17 | 0.7 | -0.87 | 0.03087 |
| ZNF813 | -0.24 | 0.76 | -1.01 | 0.03086 |
| SMYD2 | 0.11 | 0.97 | -0.86 | 0.03083 |
| RPL12 | 4.15 | 4.82 | -0.67 | 0.03091 |
| NHP2 | 0.47 | 1.44 | -0.97 | 0.0309 |
| UCHL3 | 0.61 | 1.55 | -0.94 | 0.0309 |
| RPL12P4 | 3.36 | 3.93 | -0.57 | 0.03092 |
| TFR2 | -2.37 | -1.1 | -1.28 | 0.03089 |
| MED28P1 | -1.82 | 0 | -1.83 | 0.03089 |
| MPG | 0.91 | 1.63 | -0.72 | 0.031 |
| ZNF92 | 0.56 | 1.59 | -1.03 | 0.03102 |
| ZFP37 | -2.78 | -0.9 | -1.87 | 0.03101 |
| RP11-701H24.5 | 1.45 | 2.74 | -1.29 | 0.03098 |
| RP1-257A7.5 | 3.31 | 2.29 | 1.02 | 0.03105 |
| TMEM184B | 1.7 | 0.92 | 0.78 | 0.03111 |
| IKBKAP | 1.98 | 2.77 | -0.8 | 0.0311 |
| SPICE1 | 1.04 | 1.88 | -0.85 | 0.03111 |
| CTD-2020K17.1 | 4.03 | 3.49 | 0.53 | 0.03116 |
| CCDC141 | -0.51 | 0.64 | -1.15 | 0.03117 |
| RP11-548H3.1 | 0.71 | 1.42 | -0.71 | 0.03123 |
| PDIA3P1 | 2.87 | 3.61 | -0.74 | 0.03122 |
| PALB2 | 0.45 | 1.22 | -0.78 | 0.0312 |
| HNRNPA1P16 | -0.41 | 0.59 | -1 | 0.03125 |
| DDX19B | 0.08 | 1.19 | -1.11 | 0.03129 |
| RNF13 | 3.21 | 2.67 | 0.54 | 0.0313 |
| IDUA | -0.67 | 0.29 | -0.95 | 0.03133 |
| FBXW4 | 1.76 | 2.48 | -0.71 | 0.03135 |
| TYW1 | 0.74 | 1.61 | -0.87 | 0.03135 |
| RN7SL329P | -0.14 | 1.56 | -1.69 | 0.03139 |
| SUGT1 | 1.29 | 2.13 | -0.84 | 0.03143 |
| LARS2 | 0.9 | 1.57 | -0.67 | 0.03144 |
| DDX47 | 0.63 | 1.5 | -0.87 | 0.0314 |
| MCM7 | 1.38 | 1.99 | -0.61 | 0.03145 |
| RP11-637C24.5 | 2.15 | 2.97 | -0.82 | 0.03145 |
| TRIB1 | 3.39 | 2.75 | 0.64 | 0.03144 |
| CTD-2012K14.2 | -1.49 | -0.03 | -1.46 | 0.03141 |
| GYLTL1B | -1.81 | -0.67 | -1.13 | 0.03143 |
| MRPL57 | 0.66 | 1.57 | -0.92 | 0.03152 |
| PPM1F | 4.58 | 3.76 | 0.82 | 0.03148 |
| MLC1 | 0.71 | 1.67 | -0.96 | 0.03149 |
| STARD7 | 2.73 | 3.38 | -0.65 | 0.03151 |
| AF196970.3 | -0.76 | 0.29 | -1.05 | 0.03155 |
| EI24 | 0.23 | 1.06 | -0.83 | 0.03157 |
| AP2S1 | 1.17 | 1.92 | -0.75 | 0.03161 |
| SLC46A2 | 1.1 | 1.81 | -0.71 | 0.0316 |
| AP003068.18 | -1.14 | 0.01 | -1.15 | 0.03162 |
| PIAS3 | 0.55 | 1.28 | -0.73 | 0.03168 |
| IMMP2L | -2.48 | -0.27 | -2.21 | 0.03165 |
| GIMAP7 | 4.82 | 5.63 | -0.8 | 0.03164 |
| ALDOC | 0.78 | 1.54 | -0.76 | 0.03165 |
| FGF9 | -4.05 | -1.95 | -2.1 | 0.03169 |
| CYB5R3 | 1.26 | 1.87 | -0.61 | 0.03171 |
| ABHD2 | 6.08 | 5.34 | 0.74 | 0.03173 |
| TOM1 | 2.72 | 2.14 | 0.58 | 0.03174 |
| KRT8P34 | 0.22 | 1.43 | -1.21 | 0.03186 |
| TRIM59 | -0.6 | 0.61 | -1.21 | 0.03188 |
| RP5-881P19.7 | -0.04 | 0.92 | -0.96 | 0.03183 |
| HNRNPA1P10 | 0.64 | 1.75 | -1.11 | 0.03188 |
| CCDC85C | -3.75 | -1.94 | -1.81 | 0.03188 |
| VARS2 | -0.73 | 0.37 | -1.1 | 0.03189 |
| TCOF1 | 0.52 | 1.4 | -0.88 | 0.03186 |
| CTA-390C10.10 | 1.13 | 1.95 | -0.82 | 0.03181 |
| RP11-278C7.1 | 0.68 | 1.63 | -0.95 | 0.03178 |
| CA11 | -0.9 | 0.32 | -1.22 | 0.03183 |
| KRBA1 | -0.87 | 0.08 | -0.95 | 0.03179 |
| RP11-830F9.7 | 1.89 | 2.62 | -0.73 | 0.03189 |
| MGA | 1.53 | 2.33 | -0.8 | 0.03179 |
| L3MBTL2 | 0.73 | 1.57 | -0.85 | 0.03194 |
| AL365202.1 | 0.47 | 1.28 | -0.81 | 0.03191 |
| PNPLA4 | -1.65 | -0.5 | -1.15 | 0.03194 |
| MTG1 | 0.74 | 1.56 | -0.81 | 0.03195 |
| DNAJA3 | 0.28 | 1.17 | -0.89 | 0.03193 |
| TBXAS1 | 4.81 | 4.24 | 0.57 | 0.03197 |
| FOXK1 | 2.29 | 2.94 | -0.65 | 0.03204 |
| WDR74 | -0.35 | 0.54 | -0.89 | 0.03202 |
| ULK2 | -0.29 | 0.74 | -1.02 | 0.03209 |
| STEAP4 | 5.93 | 5.31 | 0.62 | 0.03208 |
| ZNF101 | 1.55 | 2.26 | -0.71 | 0.03212 |
| CCDC13 | -0.94 | -2.12 | 1.18 | 0.03212 |
| FAM173A | -2.32 | -0.87 | -1.45 | 0.03209 |
| MT-CYB | 7.69 | 8.74 | -1.05 | 0.03214 |
| FAM210A | -1.46 | -0.45 | -1.02 | 0.03213 |
| MTX2 | -0.85 | 0.33 | -1.18 | 0.03222 |
| ZNF549 | -0.12 | 0.76 | -0.89 | 0.03224 |
| GLRX3 | 1.55 | 2.25 | -0.71 | 0.03225 |
| GRN | 5.35 | 4.72 | 0.63 | 0.0322 |
| MSANTD4 | 0.53 | 1.41 | -0.88 | 0.03226 |
| MGST3 | -0.09 | 0.83 | -0.92 | 0.03224 |
| RN7SL81P | -0.61 | 0.65 | -1.25 | 0.03224 |
| EXOG | -1.47 | -0.19 | -1.28 | 0.03224 |
| RP11-550F7.1 | 1.14 | 0.4 | 0.74 | 0.03216 |
| TMEM161B-AS1 | 0.82 | 1.76 | -0.94 | 0.03223 |
| CTD-2012J19.1 | -0.39 | -1.48 | 1.09 | 0.03222 |
| EPB41L4A | -2.12 | -0.58 | -1.54 | 0.03229 |
| LINC01278 | -0.51 | 0.46 | -0.97 | 0.03232 |
| EIF5B | 1.18 | 2.04 | -0.86 | 0.03234 |
| RP11-118B22.4 | -0.25 | 1.17 | -1.42 | 0.03238 |
| CTB-133G6.1 | 5.06 | 5.6 | -0.54 | 0.0324 |
| ZNF781 | -1.5 | -0.38 | -1.13 | 0.03241 |
| CEP170B | -4.29 | -2.41 | -1.88 | 0.03241 |
| ALKBH8 | -0.4 | 0.63 | -1.03 | 0.03239 |
| CWC27 | 0.92 | 1.66 | -0.74 | 0.03243 |
| RP11-298C3.2 | -2.02 | -0.39 | -1.63 | 0.03246 |
| ZNF761 | 0.41 | 1.3 | -0.88 | 0.03247 |
| USP54 | -2.65 | -1.14 | -1.51 | 0.03245 |
| HGF | 1.14 | 0.35 | 0.79 | 0.03251 |
| RP4-682C21.2 | -2.45 | -1.18 | -1.27 | 0.03252 |
| TTC3P1 | -0.56 | 0.55 | -1.11 | 0.0325 |
| COPZ1 | 1.89 | 2.54 | -0.65 | 0.03256 |
| CRHR1-IT1 | -1.39 | -0.21 | -1.18 | 0.03265 |
| NDUFB7 | 2.34 | 3.27 | -0.93 | 0.03261 |
| AC104058.1 | -0.46 | 0.97 | -1.43 | 0.0326 |
| SRP9P1 | 3.78 | 4.54 | -0.76 | 0.03265 |
| DHX37 | 0.1 | 0.99 | -0.89 | 0.03258 |
| HAUS4 | 2.23 | 1.38 | 0.85 | 0.03262 |
| LPCAT2 | 2.72 | 2.11 | 0.61 | 0.03261 |
| AC005307.3 | -3.86 | -1.49 | -2.37 | 0.03265 |
| PYURF | 2.73 | 3.41 | -0.67 | 0.03255 |
| B3GNT2 | 3.42 | 2.85 | 0.56 | 0.03256 |
| GOLGA6L10 | -4.23 | -2.24 | -2 | 0.03267 |
| RCC1 | -0.47 | 0.45 | -0.92 | 0.03271 |
| APEX2 | 1.39 | 2.16 | -0.77 | 0.03272 |
| ACTR5 | 1.06 | 1.99 | -0.93 | 0.03274 |
| FASTK | -0.4 | 0.45 | -0.85 | 0.03279 |
| S100A4 | 6.7 | 6.13 | 0.57 | 0.03281 |
| ZNF239 | -1.73 | -0.56 | -1.18 | 0.0328 |
| VKORC1L1 | 1.14 | 1.79 | -0.65 | 0.03284 |
| PLOD3 | 0.11 | 0.87 | -0.76 | 0.03287 |
| PTENP1 | 2.71 | 2.15 | 0.57 | 0.03288 |
| UBA2 | 2.25 | 2.93 | -0.68 | 0.03283 |
| B4GALT7 | -0.91 | 0.08 | -0.99 | 0.03288 |
| DNAJB9 | 1.47 | 2.32 | -0.85 | 0.03282 |
| RBBP7 | 1.05 | 1.77 | -0.72 | 0.03282 |
| CDIP1 | -0.15 | 0.95 | -1.1 | 0.03281 |
| CYP1B1-AS1 | -0.59 | -1.67 | 1.07 | 0.03284 |
| PHF6 | 0.41 | 1.24 | -0.83 | 0.03282 |
| UQCC1 | 0.6 | 1.43 | -0.82 | 0.03281 |
| CCNB1IP1 | -0.84 | 0.08 | -0.91 | 0.03292 |
| ZNF383 | -0.83 | 0.33 | -1.16 | 0.03291 |
| NAA35 | 1.88 | 2.54 | -0.66 | 0.03296 |
| LINC00630 | -1.19 | -0.16 | -1.04 | 0.033 |
| RP11-317F20.2 | 1.18 | 2.41 | -1.23 | 0.03299 |
| KNTC1 | 0.83 | 1.55 | -0.73 | 0.03301 |
| AAMP | 0.32 | 1.11 | -0.79 | 0.03299 |
| NME1 | -2.13 | -0.85 | -1.28 | 0.03296 |
| CHMP7 | 2.07 | 2.78 | -0.71 | 0.03298 |
| PFAS | -0.62 | 0.29 | -0.91 | 0.03305 |
| CTD-2026D20.3 | -0.05 | 0.84 | -0.89 | 0.03306 |
| ADARB1 | 0.41 | 1.19 | -0.78 | 0.03305 |
| TULP3 | -0.8 | 0.14 | -0.95 | 0.03307 |
| MOB2 | 1.36 | 2.04 | -0.68 | 0.03307 |
| SLC35A1 | 1.4 | 2.02 | -0.62 | 0.03313 |
| CTD-2619J13.5 | -0.09 | 0.99 | -1.07 | 0.03312 |
| FFAR3 | -3.26 | -1.24 | -2.02 | 0.03312 |
| RPL15P2 | 0.43 | 1.49 | -1.06 | 0.03309 |
| KIR2DP1 | 0.17 | -1 | 1.17 | 0.03313 |
| HSD17B10 | 2.19 | 2.94 | -0.76 | 0.03323 |
| AMN1 | 2.68 | 2.13 | 0.55 | 0.03321 |
| MRPL45 | 1.57 | 2.26 | -0.68 | 0.03332 |
| RP11-486G15.1 | -1.19 | 0.05 | -1.24 | 0.0332 |
| BMS1P1 | 0.79 | 1.78 | -0.99 | 0.03326 |
| HGH1 | -1.72 | -0.45 | -1.28 | 0.03325 |
| RP11-174F8.1 | -0.68 | 0.5 | -1.19 | 0.03328 |
| CLIC1 | 6.57 | 6.03 | 0.54 | 0.0332 |
| RP11-347C12.10 | 0.36 | -1.08 | 1.43 | 0.03325 |
| FAM129C | 0.93 | 1.99 | -1.06 | 0.03331 |
| SNX29P1 | 0.14 | 1.74 | -1.6 | 0.03334 |
| RALA | 1.76 | 2.42 | -0.66 | 0.03315 |
| SERPINB6 | 2.09 | 2.75 | -0.66 | 0.03321 |
| TTC9 | 2.12 | 2.77 | -0.65 | 0.03329 |
| GSE1 | 0.69 | 1.54 | -0.85 | 0.0333 |
| PCNXL2 | 0.51 | 1.49 | -0.98 | 0.03331 |
| CTB-175E5.7 | 0.83 | -0.9 | 1.73 | 0.03327 |
| SF3B5 | 3.64 | 4.3 | -0.66 | 0.03329 |
| GOLGA2P5 | -2.32 | -1.02 | -1.3 | 0.03331 |
| CPEB2-AS1 | 0.39 | -0.46 | 0.85 | 0.03354 |
| IGKV1-39 | 2.09 | 3.01 | -0.92 | 0.03336 |
| CMAS | 0.92 | 1.63 | -0.71 | 0.03345 |
| ATG101 | 0.31 | 1.08 | -0.77 | 0.03353 |
| UAP1L1 | -0.03 | 0.86 | -0.89 | 0.03351 |
| PRRC1 | 0.92 | 1.91 | -0.99 | 0.03343 |
| ZNF569 | -1.2 | 0.13 | -1.33 | 0.03337 |
| ALG8 | -0.19 | 0.7 | -0.89 | 0.03347 |
| RPSAP15 | 4.29 | 5.15 | -0.86 | 0.03339 |
| RP11-461A8.5 | -2.02 | -0.52 | -1.5 | 0.03352 |
| IPO9 | 1.86 | 2.55 | -0.68 | 0.03344 |
| ATP6V1B2 | 6.17 | 5.64 | 0.54 | 0.03342 |
| ASUN | 0.74 | 1.6 | -0.86 | 0.03348 |
| FCRL6 | 1.23 | 2.77 | -1.53 | 0.03339 |
| CISD2 | 1.43 | 2.47 | -1.04 | 0.03353 |
| DYNC2H1 | -1.41 | -0.36 | -1.06 | 0.03347 |
| NUDT12 | -2.7 | -1.27 | -1.43 | 0.03336 |
| PAPD7 | 1.13 | 1.91 | -0.79 | 0.03344 |
| RP11-798G7.8 | 1.25 | 2.09 | -0.84 | 0.03352 |
| GPN1 | 0.73 | 1.47 | -0.74 | 0.03356 |
| NNT | 1.76 | 2.49 | -0.73 | 0.03372 |
| TMEM110-MUSTN1 | 0.21 | 1.34 | -1.13 | 0.03364 |
| NKAPP1 | -0.04 | 1.01 | -1.06 | 0.0337 |
| C1GALT1P1 | -0.27 | 0.6 | -0.87 | 0.03369 |
| ARL17A | -1.06 | 0.61 | -1.67 | 0.03366 |
| POLL | 1.43 | 2.18 | -0.76 | 0.03371 |
| DYNC1I2P1 | 1.17 | 1.94 | -0.77 | 0.03371 |
| DDHD1 | 1.18 | 1.95 | -0.76 | 0.03371 |
| MUSTN1 | -0.83 | 0.63 | -1.46 | 0.03371 |
| WDR11-AS1 | -1.57 | -0.03 | -1.54 | 0.03372 |
| RPL7P57 | -2.31 | -0.8 | -1.51 | 0.03363 |
| RP5-855D21.3 | 1.54 | 2.26 | -0.72 | 0.03375 |
| ABCC3 | -0.56 | 0.44 | -1 | 0.0338 |
| PFKL | 1.79 | 2.43 | -0.64 | 0.03382 |
| HMGB3 | -2 | -3.43 | 1.43 | 0.03384 |
| WDR6 | -0.66 | 0.54 | -1.21 | 0.03388 |
| IGF2 | -2.8 | -1.13 | -1.68 | 0.03387 |
| CLEC12A | 5.39 | 3.69 | 1.7 | 0.03388 |
| TBC1D9 | 2.34 | 3.15 | -0.81 | 0.03391 |
| SSRP1 | 1.61 | 2.38 | -0.77 | 0.03393 |
| TMEM106C | -1.32 | -0.23 | -1.1 | 0.03402 |
| DROSHA | 0.85 | 1.62 | -0.77 | 0.03404 |
| GSS | 1.23 | 2.07 | -0.83 | 0.03403 |
| MT-ND6 | 4.84 | 6.62 | -1.79 | 0.03409 |
| FBXO25 | 0.21 | 1.02 | -0.81 | 0.03408 |
| ZW10 | 0.76 | 1.69 | -0.93 | 0.03411 |
| MAGI3 | -2.14 | -0.89 | -1.25 | 0.03408 |
| MED24 | -0.18 | 0.67 | -0.85 | 0.03411 |
| PPP3CC | 1.96 | 2.8 | -0.84 | 0.03417 |
| CTD-2349P21.9 | 2.39 | 2.98 | -0.59 | 0.03415 |
| SH3BP2 | 3.26 | 2.44 | 0.82 | 0.03414 |
| NUDT21 | 3.06 | 3.71 | -0.65 | 0.03419 |
| NOMO1 | 0.36 | 1.21 | -0.85 | 0.03423 |
| LMNB2 | 0.47 | 1.32 | -0.85 | 0.03422 |
| CSAD | 2.3 | 1.71 | 0.59 | 0.03422 |
| LHPP | -0.03 | 0.98 | -1.01 | 0.03433 |
| ZNF70 | 0.51 | 1.32 | -0.81 | 0.0343 |
| BDP1 | 2.28 | 3.03 | -0.75 | 0.03433 |
| EPB41 | 4.97 | 5.88 | -0.9 | 0.03433 |
| FRMD4A | -1.8 | -0.56 | -1.24 | 0.03429 |
| TDRD3 | 0.5 | 1.39 | -0.89 | 0.03437 |
| PLCXD2 | -0.08 | 0.93 | -1.02 | 0.03436 |
| RPL12P1 | 0.43 | 1.84 | -1.42 | 0.03441 |
| AC006129.2 | 2.84 | 3.72 | -0.88 | 0.0344 |
| IFT46 | -0.85 | 0.1 | -0.95 | 0.03448 |
| AC083899.3 | 0.4 | 1.32 | -0.92 | 0.03445 |
| DNAJB2 | 1.16 | 1.86 | -0.7 | 0.03447 |
| RP11-477H21.2 | -1.73 | -0.34 | -1.39 | 0.03452 |
| NOP2 | -0.24 | 0.63 | -0.87 | 0.03477 |
| REXO4 | 0.78 | 1.53 | -0.74 | 0.03471 |
| WDR86-AS1 | -1.47 | 0.17 | -1.64 | 0.03486 |
| ZNF300 | -2.25 | -1.04 | -1.21 | 0.03455 |
| CASP7 | 0.1 | 0.87 | -0.77 | 0.03471 |
| MORC4 | -1.42 | -0.28 | -1.14 | 0.0347 |
| PRH1 | -2.26 | -0.49 | -1.77 | 0.03487 |
| FAM134B | 0.16 | 1.11 | -0.96 | 0.03486 |
| RP11-111M22.4 | -0.82 | 0.56 | -1.38 | 0.03468 |
| RP11-511H9.3 | 0.6 | 1.51 | -0.91 | 0.03469 |
| PTGR2 | -3.54 | -1.77 | -1.77 | 0.03483 |
| POLR2D | -0.59 | 0.91 | -1.51 | 0.03468 |
| DUS3L | -0.5 | 0.33 | -0.83 | 0.03487 |
| GLUD1P3 | 0.41 | 1.52 | -1.11 | 0.03475 |
| RP11-452K12.6 | -1.04 | 0.13 | -1.17 | 0.03479 |
| PCSK6 | -2.52 | -1.07 | -1.45 | 0.03472 |
| GNAZ | 0.95 | 2.09 | -1.14 | 0.03481 |
| GDPD5 | 0.11 | 0.95 | -0.84 | 0.03459 |
| CTD-2023M8.1 | 1.44 | 2.22 | -0.78 | 0.03465 |
| PSMD6-AS2 | 4.94 | 4.27 | 0.66 | 0.03487 |
| SOX6 | -1.14 | -0.11 | -1.04 | 0.03475 |
| NR4A1 | -3.81 | -2.26 | -1.55 | 0.03485 |
| TRMT5 | -0.87 | 0.06 | -0.93 | 0.0348 |
| ATP6V0E2-AS1 | -1.7 | -0.49 | -1.21 | 0.0348 |
| PYGO2 | 2.56 | 3.27 | -0.71 | 0.03455 |
| IGHG2 | 3.88 | 5.03 | -1.15 | 0.03485 |
| RFX5 | 1.51 | 2.24 | -0.72 | 0.03462 |
| GNL3 | 0.97 | 1.72 | -0.75 | 0.03474 |
| HHEX | 3.17 | 2.52 | 0.65 | 0.03454 |
| METAP1D | -1.49 | -0.44 | -1.06 | 0.03456 |
| ZNF506 | 2.01 | 2.61 | -0.59 | 0.03484 |
| DDHD2 | 0.04 | 0.9 | -0.87 | 0.03472 |
| EXD2 | -1.86 | -0.71 | -1.15 | 0.03482 |
| GATC | 2 | 2.7 | -0.7 | 0.03462 |
| C20orf196 | 1.05 | 1.71 | -0.66 | 0.035 |
| MPZL3 | 4.62 | 4.06 | 0.56 | 0.03502 |
| KPNA3 | 2.58 | 3.31 | -0.73 | 0.03496 |
| HERC2P2 | 1.01 | 2.23 | -1.22 | 0.03503 |
| ZNF662 | -3.21 | -1.64 | -1.57 | 0.03495 |
| RP1-95L4.4 | -2.93 | -1.19 | -1.74 | 0.03497 |
| SLC31A2 | 5.74 | 4.79 | 0.95 | 0.03497 |
| EPHX2 | -0.28 | 0.61 | -0.89 | 0.0349 |
| RPARP-AS1 | 0.8 | 1.69 | -0.89 | 0.03489 |
| PTGES3P3 | 1.29 | 2.16 | -0.88 | 0.03494 |
| RP11-61F12.1 | 3.76 | 2.95 | 0.81 | 0.035 |
| HOMER3 | 0.9 | -0.03 | 0.94 | 0.03503 |
| EEA1 | 1.55 | 2.26 | -0.7 | 0.03494 |
| PARP15 | 3 | 3.83 | -0.83 | 0.03499 |
| TNFRSF12A | 0.46 | -0.39 | 0.85 | 0.03503 |
| RCC2P6 | -2.52 | -1.08 | -1.44 | 0.03508 |
| CH17-385C13.2 | 1.2 | 2.16 | -0.95 | 0.03507 |
| AEBP1 | -1.92 | -0.75 | -1.17 | 0.03508 |
| TAB1 | 1.77 | 2.47 | -0.7 | 0.03508 |
| CHD6 | 2.11 | 2.82 | -0.71 | 0.03518 |
| ITPA | 0.92 | 1.71 | -0.79 | 0.03522 |
| CMTR2 | 0.54 | 1.31 | -0.78 | 0.03532 |
| LTF | 3.25 | 1.31 | 1.94 | 0.03526 |
| C6orf229 | 2.4 | 1.57 | 0.84 | 0.03529 |
| RP1-77H15.1 | -1.54 | -0.21 | -1.33 | 0.03529 |
| RUNX2 | 0.43 | 1.79 | -1.36 | 0.03526 |
| RPS18P9 | 0.5 | 1.6 | -1.1 | 0.0353 |
| LINC00664 | -0.41 | -2.24 | 1.83 | 0.03528 |
| MYO9A | -0.11 | 0.97 | -1.08 | 0.03536 |
| RP11-16E12.1 | 2.24 | 1.52 | 0.72 | 0.03535 |
| SLC2A1-AS1 | -2.22 | -0.86 | -1.36 | 0.03538 |
| BET1 | 0 | 0.82 | -0.82 | 0.03539 |
| RP11-454F8.3 | -1.01 | 0.17 | -1.19 | 0.03544 |
| CTSS | 7.75 | 7.18 | 0.57 | 0.03548 |
| KCTD6 | -0.71 | 0.74 | -1.45 | 0.03547 |
| BCAS2 | 2.43 | 3.06 | -0.63 | 0.03543 |
| LLGL2 | -0.2 | 0.89 | -1.09 | 0.03546 |
| C2CD2 | -0.69 | 0.2 | -0.89 | 0.03542 |
| TTN | 0.22 | 1.31 | -1.09 | 0.03553 |
| C19orf33 | -1.66 | -0.2 | -1.45 | 0.03562 |
| TEX12 | -3.7 | -2.1 | -1.61 | 0.03562 |
| PPP2R1A | 2.3 | 2.9 | -0.59 | 0.03555 |
| PTMS | 0.31 | 1.14 | -0.83 | 0.03559 |
| PDGFC | -1.45 | -0.27 | -1.18 | 0.03559 |
| CDC7 | 0.68 | 1.56 | -0.88 | 0.03556 |
| ZNF510 | 1.77 | 2.59 | -0.81 | 0.03561 |
| PTDSS1 | 1.77 | 2.39 | -0.62 | 0.0356 |
| RPSAP19 | 0.78 | 1.85 | -1.07 | 0.03556 |
| NCR3LG1 | -1.11 | 0.12 | -1.23 | 0.03566 |
| TSTD2 | 0.31 | 1.16 | -0.85 | 0.03572 |
| ALKBH5 | 3.83 | 4.37 | -0.54 | 0.0357 |
| RTN3 | 4.74 | 3.69 | 1.04 | 0.0357 |
| TAMM41 | 0.02 | 0.99 | -0.98 | 0.0357 |
| FAM153A | -0.51 | 0.51 | -1.02 | 0.0357 |
| ETNK1 | 3.1 | 3.73 | -0.63 | 0.03569 |
| IPO5P1 | 0.86 | 1.67 | -0.81 | 0.03575 |
| C6orf106 | 4.18 | 4.68 | -0.5 | 0.03577 |
| RP11-284M14.1 | -0.48 | 0.66 | -1.14 | 0.03578 |
| GMFG | 4.97 | 4.21 | 0.76 | 0.03593 |
| URB1-AS1 | -1.37 | 0.14 | -1.51 | 0.03587 |
| SDAD1 | 1.58 | 2.39 | -0.81 | 0.03595 |
| CTC-529I10.2 | 0.25 | 1.46 | -1.21 | 0.03599 |
| LEO1 | 1.29 | 2.16 | -0.87 | 0.03595 |
| TRAV16 | 0.86 | 1.82 | -0.97 | 0.03597 |
| AVPR1A | -1.48 | -0.23 | -1.25 | 0.03601 |
| RNASEH2A | -0.41 | 0.56 | -0.97 | 0.03589 |
| LAMC1 | -1.71 | -0.44 | -1.28 | 0.03589 |
| GATB | -1.72 | -0.61 | -1.11 | 0.036 |
| CTD-2310F14.1 | -3.07 | -1.42 | -1.64 | 0.03596 |
| LRRC40 | 1.77 | 2.52 | -0.75 | 0.03599 |
| ZBTB2 | 2.88 | 3.47 | -0.59 | 0.036 |
| MIRLET7BHG | 1.57 | 0.85 | 0.72 | 0.03597 |
| OTX1 | -0.46 | -1.86 | 1.4 | 0.03586 |
| SBF2 | 3.33 | 2.69 | 0.64 | 0.03597 |
| SAMD8 | 3.15 | 2.64 | 0.51 | 0.03591 |
| UPF3AP1 | -2.91 | -0.92 | -1.99 | 0.03606 |
| ZNF354A | 3.65 | 2.56 | 1.09 | 0.03605 |
| IGHV4-59 | 2.13 | 3.27 | -1.14 | 0.03611 |
| AC104809.4 | -1.37 | 0.2 | -1.57 | 0.03615 |
| HSF2 | 0.34 | 1.26 | -0.91 | 0.03613 |
| SDCCAG3 | 0.12 | 0.93 | -0.81 | 0.03617 |
| RRP7BP | 1.23 | 1.97 | -0.75 | 0.03618 |
| RP5-1056L3.3 | 1.85 | 2.62 | -0.77 | 0.03617 |
| USP11 | 1.04 | 1.79 | -0.75 | 0.0362 |
| TMEM41A | -0.39 | 0.59 | -0.98 | 0.03621 |
| MS4A7 | 1.29 | 2.23 | -0.95 | 0.03627 |
| ZNF684 | 0.08 | -1.44 | 1.51 | 0.03624 |
| NF2 | 0.81 | 1.59 | -0.78 | 0.03631 |
| ACVR2B | -3.35 | -1.22 | -2.13 | 0.03628 |
| PFKP | 1.88 | 2.75 | -0.87 | 0.03633 |
| AC078883.3 | -1.69 | -0.42 | -1.27 | 0.03633 |
| CFLAR | 5.81 | 5.3 | 0.5 | 0.03634 |
| LIG1 | 0.34 | 1.21 | -0.86 | 0.0363 |
| STAMBPL1 | 0.75 | 1.61 | -0.86 | 0.03644 |
| IGKV1-33 | 0.21 | 1.13 | -0.92 | 0.03641 |
| BBOF1 | 0.18 | 1.23 | -1.05 | 0.03644 |
| C9orf40 | 0.15 | 0.96 | -0.82 | 0.03649 |
| PTPRA | 3.43 | 3.95 | -0.51 | 0.03648 |
| HIST1H1D | 5.47 | 6.18 | -0.71 | 0.03642 |
| VASP | 5.3 | 4.72 | 0.58 | 0.03639 |
| LINC00862 | 0.63 | -0.4 | 1.03 | 0.03639 |
| AKAP7 | -0.47 | 0.45 | -0.92 | 0.03648 |
| LGALS2 | 2.22 | 2.79 | -0.56 | 0.03642 |
| YTHDF3 | 3.06 | 2.3 | 0.76 | 0.03643 |
| TPST2 | 2.48 | 3.14 | -0.66 | 0.03646 |
| RP11-242C19.2 | 3.51 | 2.75 | 0.77 | 0.0365 |
| HAR1A | -2.93 | -1.2 | -1.73 | 0.03656 |
| NFIX | 0.58 | 1.82 | -1.25 | 0.03664 |
| RP11-972P1.11 | 1.99 | 0.91 | 1.07 | 0.03663 |
| RP11-810P12.7 | 2.07 | 1.41 | 0.66 | 0.03661 |
| PRIM1 | 0.49 | 1.31 | -0.82 | 0.03662 |
| BOLA3 | -2.73 | -1.45 | -1.28 | 0.03674 |
| FBXO34 | 1.78 | 0.28 | 1.5 | 0.03681 |
| RP11-562A8.1 | 3.56 | 2.9 | 0.66 | 0.0367 |
| LINC01002 | 1.39 | 0.21 | 1.18 | 0.03666 |
| OCM | -0.85 | 0.14 | -0.99 | 0.0368 |
| TTC4 | 0.68 | 1.45 | -0.77 | 0.03669 |
| HLA-B | 9.33 | 8.73 | 0.59 | 0.03685 |
| CELSR3 | -3.55 | -2.04 | -1.51 | 0.03681 |
| AKR1B1 | 0.27 | 1.1 | -0.83 | 0.03685 |
| KIAA1324 | 2.77 | 1.64 | 1.13 | 0.03671 |
| KCNJ2 | 5.42 | 4.75 | 0.68 | 0.03684 |
| TBC1D30 | 0.32 | -0.65 | 0.98 | 0.03679 |
| SMYD4 | 1.3 | 2.05 | -0.76 | 0.03684 |
| LINC01336 | -0.51 | 0.92 | -1.43 | 0.03673 |
| RP11-793H13.8 | 4.69 | 5.2 | -0.51 | 0.03685 |
| CTD-2506J14.1 | -0.03 | 1.04 | -1.07 | 0.03682 |
| SEH1L | -0.3 | 0.6 | -0.89 | 0.03672 |
| RAB3IP | -0.3 | 0.59 | -0.89 | 0.03682 |
| GNB2L1 | 2.92 | 3.56 | -0.64 | 0.03708 |
| PHKA2 | 2.9 | 2.37 | 0.54 | 0.03709 |
| AC083843.1 | 0.6 | 1.39 | -0.79 | 0.03694 |
| OSER1 | 4.99 | 4.47 | 0.52 | 0.03692 |
| DPY19L4 | -0.13 | 0.92 | -1.05 | 0.03694 |
| BAG2 | -0.31 | 0.65 | -0.96 | 0.03708 |
| TIMM23B | 1.26 | 1.99 | -0.73 | 0.03699 |
| METTL10 | -0.49 | 0.4 | -0.89 | 0.03707 |
| ATL3 | 2.96 | 3.58 | -0.62 | 0.03694 |
| SLC25A44 | 3.71 | 3.02 | 0.69 | 0.03712 |
| DDX3Y | 3.46 | -1.79 | 5.25 | 0.03698 |
| RP11-730K11.1 | 1.28 | 2.07 | -0.79 | 0.037 |
| GIMAP1 | 3.43 | 4.09 | -0.67 | 0.03709 |
| NFAM1 | 7.11 | 6.42 | 0.7 | 0.03688 |
| TMSB15B | -2.87 | -1.26 | -1.61 | 0.03703 |
| RP11-23J9.5 | -0.13 | 1.3 | -1.43 | 0.03695 |
| TNS1 | 2.78 | 3.78 | -1 | 0.03701 |
| CXCR6 | -1.63 | 0.28 | -1.91 | 0.03689 |
| HLCS | -0.59 | 0.42 | -1.01 | 0.03709 |
| GFM1 | 0.6 | 1.5 | -0.9 | 0.03698 |
| BARD1 | -0.02 | 0.75 | -0.77 | 0.03712 |
| RP11-131M11.3 | -2.7 | -1 | -1.69 | 0.0369 |
| COL24A1 | -3.71 | -2.01 | -1.7 | 0.03707 |
| QARS | 1.27 | 1.88 | -0.61 | 0.0371 |
| SHPRH | 1.29 | 2.03 | -0.74 | 0.03699 |
| ENTPD6 | 1.1 | 1.76 | -0.66 | 0.03699 |
| RN7SKP269 | 2.81 | 2.1 | 0.71 | 0.03723 |
| FBXW9 | -2.34 | -0.99 | -1.35 | 0.03717 |
| RP11-353N4.6 | 2.56 | 3.17 | -0.61 | 0.03722 |
| CEP85L | 2.01 | 2.73 | -0.72 | 0.0373 |
| RP13-616I3.1 | -3.53 | -2.06 | -1.47 | 0.0373 |
| ARL6 | -1.99 | -0.54 | -1.45 | 0.03731 |
| CHML | 1.93 | 2.7 | -0.76 | 0.03731 |
| ARPIN | 0.06 | 0.94 | -0.88 | 0.03727 |
| PTDSS2 | -1.32 | -0.18 | -1.14 | 0.03723 |
| RIN3 | 4.42 | 3.9 | 0.52 | 0.03718 |
| CD101 | 1.37 | 2.23 | -0.86 | 0.0373 |
| RN7SKP80 | 6.24 | 5.37 | 0.86 | 0.03726 |
| DDX18 | 2.02 | 2.79 | -0.77 | 0.0373 |
| PEX26 | 0.52 | 1.35 | -0.83 | 0.03719 |
| IGKV1D-33 | -1.03 | 0.61 | -1.64 | 0.03733 |
| BCLAF1 | 2.69 | 3.21 | -0.52 | 0.03743 |
| C6orf3 | -0.18 | 0.73 | -0.92 | 0.03742 |
| PDSS2 | 0.88 | 1.53 | -0.65 | 0.03742 |
| EIF5AL1 | 0.38 | 1.11 | -0.72 | 0.03748 |
| RRM2P3 | 0.27 | 1.29 | -1.02 | 0.03749 |
| CTC1 | 2.63 | 3.31 | -0.67 | 0.03755 |
| TARS | 1.08 | 1.82 | -0.73 | 0.03761 |
| PARVB | 0 | 1.05 | -1.06 | 0.03752 |
| UTP3 | 2.85 | 3.46 | -0.61 | 0.03759 |
| PRTFDC1 | -3.34 | -1.3 | -2.04 | 0.03757 |
| ATP6V0E2 | -0.92 | 0.24 | -1.16 | 0.03752 |
| FAAP100 | 0.79 | 1.59 | -0.8 | 0.03754 |
| PPP1R12BP1 | 0.71 | -0.15 | 0.85 | 0.03758 |
| RP11-527F13.1 | -2.3 | -1.04 | -1.25 | 0.03755 |
| SOX12 | -0.63 | 0.37 | -1.01 | 0.03762 |
| KLRK1 | 2.9 | 4 | -1.1 | 0.03768 |
| RP11-571I18.4 | 4.17 | 3.57 | 0.61 | 0.03768 |
| ZNF226 | 0.61 | 1.49 | -0.88 | 0.03772 |
| VAC14 | 1.47 | 2.07 | -0.61 | 0.0377 |
| RP11-418J17.1 | -0.34 | 0.57 | -0.9 | 0.03773 |
| RP11-153M3.1 | -3.65 | -1.81 | -1.83 | 0.03779 |
| ZNF623 | 2.01 | 2.65 | -0.65 | 0.03782 |
| RP11-395E19.6 | 0.34 | -0.86 | 1.2 | 0.03778 |
| ALDH16A1 | 0.77 | 1.5 | -0.73 | 0.03776 |
| ANP32E | 1.55 | 2.24 | -0.68 | 0.03777 |
| CDK8 | 0.54 | 1.26 | -0.72 | 0.03778 |
| C12orf66 | -0.37 | 0.53 | -0.9 | 0.03795 |
| RAD18 | 0.16 | 0.96 | -0.8 | 0.03783 |
| RAB3IL1 | -1.16 | 0.19 | -1.34 | 0.03792 |
| MLF2 | 3.66 | 3.15 | 0.51 | 0.03784 |
| ZC3H8 | -0.4 | 0.49 | -0.89 | 0.0379 |
| RP11-262D11.2 | -1.75 | -0.39 | -1.36 | 0.03787 |
| TBC1D7 | 0.99 | 0.24 | 0.75 | 0.03786 |
| RPAP2 | 0.89 | 1.65 | -0.76 | 0.03796 |
| XYLT2 | 1.09 | 1.8 | -0.71 | 0.0379 |
| HMCES | 1.3 | 1.91 | -0.61 | 0.03795 |
| SMARCA4 | 1.49 | 2.21 | -0.72 | 0.03786 |
| RP11-534L20.5 | 0.52 | 1.86 | -1.34 | 0.03789 |
| CNTNAP1 | -3.03 | -1.59 | -1.44 | 0.03796 |
| CD19 | -0.04 | 0.89 | -0.94 | 0.03795 |
| XPNPEP2 | -2.92 | -1.41 | -1.5 | 0.038 |
| HIST1H1C | 6.19 | 6.97 | -0.78 | 0.03806 |
| CRYZ | -0.38 | 0.61 | -0.99 | 0.03804 |
| UBTF | 2.7 | 3.24 | -0.53 | 0.03804 |
| CNTF | 0.29 | 1.18 | -0.89 | 0.03806 |
| GTF3A | 2.34 | 2.91 | -0.57 | 0.03813 |
| FNBP1L | -1.17 | -0.16 | -1 | 0.0381 |
| ALOX15B | -1.28 | -2.8 | 1.52 | 0.03813 |
| CENPL | -1.3 | -0.35 | -0.94 | 0.03811 |
| KCNJ15 | 4.35 | 2.75 | 1.6 | 0.03812 |
| PEA15 | 2.6 | 3.32 | -0.72 | 0.03817 |
| TJP2 | 0.1 | 1.04 | -0.94 | 0.03816 |
| SETD7 | 0.55 | 1.24 | -0.69 | 0.03831 |
| UBBP1 | 0.87 | 1.94 | -1.07 | 0.03832 |
| RPH3A | -1.2 | -3.04 | 1.84 | 0.03825 |
| CATSPERG | -1.6 | -0.6 | -1 | 0.03826 |
| RP11-271K11.5 | -1.75 | -3.6 | 1.85 | 0.03829 |
| DPY19L1 | 1.23 | 1.91 | -0.68 | 0.03828 |
| DZIP1L | -1.97 | -3.45 | 1.49 | 0.03826 |
| TAF1B | 1.02 | 1.72 | -0.69 | 0.03832 |
| SNAPC3 | 2.12 | 2.76 | -0.64 | 0.03833 |
| FAM221A | -2.33 | -0.89 | -1.43 | 0.03836 |
| SF3A3P1 | -1.42 | -3.14 | 1.71 | 0.03839 |
| RP11-383G6.3 | -0.33 | 0.73 | -1.06 | 0.03835 |
| ABI2 | -2.27 | -0.95 | -1.31 | 0.03842 |
| CTC-137K3.1 | 2.84 | 2.27 | 0.57 | 0.03841 |
| POU6F1 | -0.52 | 0.56 | -1.07 | 0.03848 |
| RP11-566K19.8 | 0.84 | 0.11 | 0.74 | 0.03848 |
| NDUFV3 | 1.46 | 2.08 | -0.62 | 0.03849 |
| RP11-603B24.1 | 0.05 | 1.46 | -1.41 | 0.03847 |
| TMEM64 | -0.11 | 0.86 | -0.97 | 0.03848 |
| ABCB1 | 0.11 | 1.23 | -1.12 | 0.03854 |
| CAMSAP1 | 0.67 | 1.38 | -0.71 | 0.03856 |
| RP11-367N14.2 | -1.37 | -0.13 | -1.24 | 0.03859 |
| ATRN | 1.65 | 2.42 | -0.78 | 0.03856 |
| NME1-NME2 | -0.26 | 1.04 | -1.3 | 0.03855 |
| RP11-489E7.4 | -2.91 | -1.66 | -1.25 | 0.03879 |
| COG5 | 2.62 | 3.28 | -0.66 | 0.0387 |
| ZSCAN12 | 0.42 | 1.22 | -0.8 | 0.0388 |
| CTC-444N24.11 | 2.82 | 3.45 | -0.63 | 0.03876 |
| BYSL | -1.5 | -0.48 | -1.02 | 0.03867 |
| WARS2 | -0.64 | 0.33 | -0.97 | 0.03873 |
| STT3A | 1.57 | 2.3 | -0.73 | 0.03878 |
| SPEF2 | -1.65 | -0.32 | -1.33 | 0.03877 |
| CCT8 | 2.39 | 3.07 | -0.68 | 0.03864 |
| FAM43A | 1.84 | 2.59 | -0.75 | 0.03867 |
| DNAAF5 | -0.83 | 0.11 | -0.93 | 0.03873 |
| RNF165 | -1.81 | -0.77 | -1.04 | 0.03874 |
| RAP1B | 2.86 | 3.38 | -0.52 | 0.03878 |
| AC005220.3 | 0.1 | -1.01 | 1.11 | 0.03873 |
| CRYBG3 | 1.1 | 1.96 | -0.86 | 0.03875 |
| HNRNPA3 | 0.67 | 3.15 | -2.48 | 0.03874 |
| RP11-255H23.2 | -1.2 | 0.05 | -1.26 | 0.03869 |
| ERMP1 | 0.64 | 1.46 | -0.82 | 0.03881 |
| MRPS7 | -0.21 | 0.62 | -0.83 | 0.03872 |
| FOS | 3.45 | 2.62 | 0.83 | 0.03862 |
| COL4A3 | -2.97 | -1.16 | -1.81 | 0.03888 |
| POGLUT1 | 0.99 | 1.69 | -0.7 | 0.03885 |
| HSPD1 | 1.85 | 2.56 | -0.7 | 0.03885 |
| GUF1 | 1.16 | 1.92 | -0.76 | 0.03889 |
| EIF2AK4 | 0.6 | 1.3 | -0.7 | 0.03889 |
| LINC00852 | 2.28 | 2.83 | -0.55 | 0.03892 |
| MARCKSL1 | 3.71 | 4.25 | -0.54 | 0.03896 |
| GPBAR1 | 0.35 | 1.1 | -0.75 | 0.03902 |
| ZNF749 | -0.67 | 0.42 | -1.09 | 0.03901 |
| AC008982.2 | 1.53 | 2.31 | -0.78 | 0.03907 |
| XXbac-BPG154L12.4 | -3.14 | -1.51 | -1.63 | 0.03914 |
| CYBRD1 | 1.71 | 1.05 | 0.66 | 0.03913 |
| CD79B | 1.79 | 2.84 | -1.04 | 0.03921 |
| LEF1-AS1 | -1.67 | 0.25 | -1.93 | 0.03917 |
| RP11-262H14.4 | -1.64 | -3.45 | 1.8 | 0.03919 |
| HBG2 | 2.51 | 6.21 | -3.7 | 0.03917 |
| OSTC | 1.59 | 2.24 | -0.65 | 0.03917 |
| RP11-36B15.1 | 2.37 | 1.59 | 0.78 | 0.03926 |
| HS2ST1 | 1.55 | 2.17 | -0.62 | 0.03926 |
| EVC2 | -3.01 | -1.65 | -1.36 | 0.0393 |
| HLA-DPA1 | 3.31 | 4.16 | -0.85 | 0.03938 |
| RP11-505K9.5 | 1.38 | 2.43 | -1.06 | 0.03934 |
| C21orf33 | 0.87 | 1.61 | -0.74 | 0.03937 |
| ARHGEF3 | 2.67 | 3.32 | -0.65 | 0.03935 |
| CCDC85B | 0.8 | 1.51 | -0.7 | 0.03947 |
| LMBRD2 | 1.93 | 2.58 | -0.65 | 0.03947 |
| ATP6AP1 | 3.23 | 2.73 | 0.5 | 0.03952 |
| RP3-508I15.14 | 0.46 | -0.57 | 1.03 | 0.03956 |
| CCDC18-AS1 | 0.9 | 1.72 | -0.82 | 0.03956 |
| DGCR2 | 3.95 | 3.33 | 0.63 | 0.0396 |
| PPP2R1B | 1.14 | 1.93 | -0.79 | 0.03962 |
| RP11-667M19.9 | 0.86 | 1.87 | -1.01 | 0.03958 |
| AC104306.1 | -0.45 | -1.58 | 1.14 | 0.0396 |
| RP11-454F8.2 | 0.79 | 1.56 | -0.77 | 0.03962 |
| FAM179B | -0.57 | 0.31 | -0.87 | 0.03968 |
| DPYSL2 | 2.65 | 3.38 | -0.73 | 0.03968 |
| FUCA1 | 2.51 | 3.12 | -0.61 | 0.03971 |
| RP11-243J16.7 | -0.19 | 1.07 | -1.26 | 0.03969 |
| ETHE1 | 0.39 | 1.11 | -0.71 | 0.03968 |
| GPR89B | -0.07 | 0.98 | -1.05 | 0.03971 |
| TSNARE1 | -0.03 | 0.92 | -0.95 | 0.03975 |
| RP11-430K21.2 | 1.32 | 2.03 | -0.71 | 0.03977 |
| WDR75 | 1.53 | 2.31 | -0.78 | 0.03979 |
| LRWD1 | 2.06 | 1.36 | 0.7 | 0.03974 |
| IKBKE | 2.38 | 3.01 | -0.63 | 0.03977 |
| YLPM1 | 2.47 | 3.21 | -0.74 | 0.03986 |
| CA5BP1 | 0.73 | 1.55 | -0.82 | 0.03985 |
| MRPL35 | -0.02 | 1.05 | -1.07 | 0.03983 |
| GCSAML | -2.8 | -1.47 | -1.34 | 0.03993 |
| ACTA2 | 0.14 | 0.9 | -0.76 | 0.03996 |
| SHARPIN | 1.59 | 2.44 | -0.85 | 0.03995 |
| AGPAT3 | 0.69 | 1.38 | -0.69 | 0.04004 |
| ZNF835 | -1.76 | -0.54 | -1.22 | 0.04005 |
| NDFIP2 | -3.36 | -1.88 | -1.47 | 0.04003 |
| RUNDC3A | -0.01 | 1.2 | -1.21 | 0.04011 |
| SSH2 | 6.03 | 5.44 | 0.59 | 0.04011 |
| RP11-285J16.1 | 0.52 | 1.3 | -0.78 | 0.04013 |
| VIPR1 | 0.54 | 1.25 | -0.71 | 0.04011 |
| UBE2Q2P1 | -1.65 | -0.23 | -1.42 | 0.04009 |
| JAK2 | 5.33 | 4.8 | 0.53 | 0.04007 |
| RP4-633I8.4 | 0.59 | 1.28 | -0.69 | 0.04011 |
| CBWD2 | 1.04 | 1.72 | -0.69 | 0.04018 |
| RPLP0 | 3.2 | 3.8 | -0.59 | 0.04026 |
| ARF1P2 | 1.49 | 2.48 | -0.99 | 0.04025 |
| CD1C | 1.16 | 2.01 | -0.85 | 0.04026 |
| CTC-559E9.6 | -0.96 | 0.01 | -0.98 | 0.04024 |
| ZBTB33 | 2.36 | 3.06 | -0.7 | 0.04033 |
| RBM28 | 1.07 | 1.77 | -0.69 | 0.04037 |
| ACADS | 0.06 | 0.82 | -0.77 | 0.04037 |
| MBTPS2 | -0.22 | 0.62 | -0.84 | 0.04043 |
| ZNF519 | -1.72 | -0.63 | -1.09 | 0.04049 |
| KLLN | 0.7 | -0.53 | 1.24 | 0.04044 |
| DICER1 | 4.28 | 3.77 | 0.52 | 0.0404 |
| SLC39A3 | 0.24 | 0.95 | -0.71 | 0.04048 |
| PRKX | 2.54 | 3.3 | -0.77 | 0.04044 |
| NDC80 | 0.73 | -0.22 | 0.95 | 0.04048 |
| PPT2 | -1.1 | -0.19 | -0.91 | 0.04049 |
| RP11-330O11.3 | 1.81 | 1.12 | 0.69 | 0.04049 |
| MTCO1P12 | -1.49 | -0.11 | -1.37 | 0.04058 |
| PMM2 | 0.93 | 1.59 | -0.66 | 0.04053 |
| RP11-582J16.4 | -1.32 | -0.3 | -1.01 | 0.04061 |
| TBC1D9B | 1.22 | 1.95 | -0.73 | 0.04054 |
| CHP1 | 4.25 | 3.05 | 1.2 | 0.04052 |
| NCL | 2.96 | 3.64 | -0.68 | 0.04056 |
| MYLK4 | -3.17 | -1.78 | -1.39 | 0.04061 |
| SERTAD2 | 3.05 | 3.61 | -0.56 | 0.04058 |
| PGRMC2 | -0.07 | 0.79 | -0.86 | 0.04056 |
| RP9P | -0.48 | -1.46 | 0.98 | 0.04066 |
| RN7SKP50 | -0.14 | 1.18 | -1.32 | 0.04073 |
| RP11-613C6.4 | 1.73 | 2.37 | -0.64 | 0.0407 |
| ZDHHC9 | -2.6 | -1.16 | -1.44 | 0.04081 |
| CHD1L | 1.59 | 2.25 | -0.66 | 0.04079 |
| CCDC136 | -2.02 | -0.84 | -1.17 | 0.04082 |
| LIPE | -0.94 | -0.1 | -0.85 | 0.04074 |
| C12orf75 | 0.03 | 1.1 | -1.07 | 0.04076 |
| RNASEL | 4.45 | 3.94 | 0.52 | 0.04083 |
| KDELR1 | 2.26 | 2.81 | -0.55 | 0.0409 |
| SNED1 | -1.37 | -0.45 | -0.92 | 0.04087 |
| CDC16 | 2.18 | 2.88 | -0.7 | 0.0409 |
| RP11-357N13.6 | 0.4 | 1.56 | -1.16 | 0.04088 |
| RPL38 | 3.19 | 3.81 | -0.61 | 0.04093 |
| PRR4 | -0.33 | 0.58 | -0.91 | 0.04108 |
| BICD1 | -0.47 | 0.5 | -0.97 | 0.04105 |
| INAFM2 | 3.35 | 3.95 | -0.6 | 0.04107 |
| MRPS6 | 1.97 | 2.55 | -0.57 | 0.04103 |
| ZMYM1 | -0.29 | 0.61 | -0.9 | 0.04105 |
| SEPN1 | 1.04 | 1.71 | -0.68 | 0.04102 |
| SNRPF | 0.01 | 1.04 | -1.04 | 0.04109 |
| CTC-250I14.3 | 1.08 | -0.11 | 1.19 | 0.04102 |
| PDHX | 1.07 | 1.69 | -0.62 | 0.04102 |
| UFM1 | 2.81 | 3.44 | -0.63 | 0.04101 |
| RP11-302M6.5 | -0.05 | 0.85 | -0.9 | 0.04118 |
| AGTRAP | 2.88 | 2.27 | 0.61 | 0.04124 |
| RPS4Y1 | 3.95 | -0.9 | 4.85 | 0.04115 |
| RPL7L1 | 1.12 | 1.79 | -0.67 | 0.04115 |
| SLC7A5 | 1.71 | 2.48 | -0.76 | 0.04122 |
| TLR1 | 5.81 | 5.17 | 0.64 | 0.04123 |
| SYNCRIP | 2.76 | 3.49 | -0.73 | 0.04115 |
| ACOX1 | 4.33 | 3.8 | 0.53 | 0.04116 |
| RP11-74E22.3 | -1.04 | 0.22 | -1.25 | 0.04113 |
| HELQ | 1.16 | 1.82 | -0.66 | 0.04113 |
| EIF3B | 1.7 | 2.36 | -0.67 | 0.04124 |
| CARS2 | 2.09 | 1.46 | 0.64 | 0.04121 |
| API5P1 | 0.08 | 0.93 | -0.86 | 0.04135 |
| EPB41L2 | -1.74 | -0.61 | -1.13 | 0.0413 |
| PTCD1 | -0.21 | 0.57 | -0.78 | 0.04135 |
| ACACA | -0.24 | 0.63 | -0.87 | 0.04136 |
| CTCF | 3.61 | 4.16 | -0.55 | 0.04131 |
| RN7SL130P | 1.17 | -0.3 | 1.47 | 0.04133 |
| TMEM99 | -2.87 | -1.45 | -1.42 | 0.04137 |
| RP11-248M19.1 | 0.75 | 1.43 | -0.68 | 0.0414 |
| ACSS1 | 1.83 | 2.51 | -0.68 | 0.04141 |
| BMPR1A | -0.84 | 0.33 | -1.17 | 0.04139 |
| PEPD | 0.84 | 1.54 | -0.7 | 0.0415 |
| NTHL1 | -2.39 | -1.14 | -1.24 | 0.04148 |
| ILVBL | -1.31 | -0.34 | -0.97 | 0.04158 |
| DDX31 | 0.19 | 1.06 | -0.87 | 0.04157 |
| ECHDC2 | -0.2 | 0.64 | -0.83 | 0.04159 |
| NUDT9 | -1.05 | 0.06 | -1.11 | 0.04156 |
| ZNF248 | -0.32 | 0.64 | -0.96 | 0.04158 |
| RP5-951N9.2 | -2.08 | -0.5 | -1.57 | 0.04167 |
| COX14 | 1.16 | 1.85 | -0.69 | 0.04167 |
| FKBP9P1 | -2.26 | -4.15 | 1.89 | 0.04166 |
| DCTD | 0.06 | 1.06 | -1 | 0.0417 |
| MRPL38 | -0.8 | 0.81 | -1.61 | 0.04171 |
| RP11-455G16.1 | -3.44 | -1.35 | -2.09 | 0.04172 |
| VEPH1 | -2.86 | -1.35 | -1.51 | 0.04176 |
| CD302 | 5.33 | 4.7 | 0.64 | 0.04178 |
| SERGEF | 0.53 | 1.21 | -0.68 | 0.0418 |
| SIGMAR1 | 0.15 | 0.89 | -0.75 | 0.0418 |
| EID2 | 0.17 | 1.29 | -1.11 | 0.04196 |
| CIZ1 | 0.38 | 1.1 | -0.72 | 0.04186 |
| KEAP1 | 0.7 | 1.33 | -0.63 | 0.04186 |
| QRSL1 | 1.54 | 2.17 | -0.63 | 0.04198 |
| SNRPD1 | 0.09 | 0.84 | -0.75 | 0.04191 |
| RP3-414A15.12 | -1.98 | -0.28 | -1.69 | 0.04197 |
| UQCC2 | -0.01 | 0.8 | -0.81 | 0.0419 |
| IRF2BP1 | 2.04 | 2.67 | -0.63 | 0.04195 |
| AKAP2 | -0.27 | 0.77 | -1.05 | 0.04193 |
| ALDH3B1 | 1.88 | 1.23 | 0.65 | 0.04191 |
| AC026150.6 | -1.07 | -2.56 | 1.49 | 0.04194 |
| SLC5A3 | 2.99 | 3.63 | -0.63 | 0.04187 |
| GCLC | 0.65 | 1.4 | -0.75 | 0.04188 |
| RP11-156P1.3 | -0.14 | 0.71 | -0.85 | 0.04196 |
| TBCK | 0.84 | 1.51 | -0.67 | 0.0419 |
| RP5-1142A6.9 | -1.36 | -0.36 | -1 | 0.04204 |
| ENPP7P1 | -2.21 | -1.02 | -1.19 | 0.04215 |
| MAF | 1.58 | 2.52 | -0.94 | 0.04219 |
| XPO5 | 0.75 | 1.55 | -0.8 | 0.04217 |
| RP1-145M24.1 | -1.26 | -0.06 | -1.2 | 0.04219 |
| TRPM7 | 2.52 | 3.16 | -0.64 | 0.04217 |
| NUDCD2 | -0.75 | 0.25 | -1 | 0.04214 |
| POGK | 1.92 | 2.49 | -0.56 | 0.04216 |
| GID4 | 1.55 | 2.1 | -0.55 | 0.04214 |
| TMEM158 | -1.1 | 0.5 | -1.61 | 0.04219 |
| F2R | 2.49 | 3.19 | -0.7 | 0.04225 |
| UBE2V1P1 | -0.57 | 0.98 | -1.56 | 0.04223 |
| PRR7 | -0.59 | 0.33 | -0.92 | 0.04223 |
| TLK1 | 2.73 | 3.25 | -0.52 | 0.04225 |
| NHLRC2 | 2.33 | 3 | -0.66 | 0.04228 |
| ARRDC2 | 2.1 | 2.64 | -0.55 | 0.04229 |
| UBE2K | 1.33 | 2.46 | -1.13 | 0.04237 |
| ARRDC1-AS1 | -0.13 | 0.74 | -0.88 | 0.0425 |
| CEP70 | -1.03 | -0.02 | -1.01 | 0.04246 |
| NOL10 | 1.23 | 1.94 | -0.72 | 0.04251 |
| RPL5 | 4.15 | 4.79 | -0.64 | 0.04248 |
| SNX9 | 1.98 | 2.64 | -0.66 | 0.04246 |
| IMMP1L | -1.14 | -0.06 | -1.09 | 0.04241 |
| GHRLOS | 0.45 | 1.13 | -0.68 | 0.04246 |
| HMGB3P22 | -1.47 | -0.49 | -0.98 | 0.04246 |
| RP11-278A23.2 | 0.55 | 1.42 | -0.87 | 0.04246 |
| MBLAC2 | 0.47 | 1.35 | -0.88 | 0.04257 |
| PGS1 | 4.43 | 3.63 | 0.8 | 0.04253 |
| POT1 | -0.06 | 0.69 | -0.75 | 0.04256 |
| SMIM15 | 2.04 | 2.58 | -0.55 | 0.04257 |
| METTL21EP | -2.32 | -1.07 | -1.25 | 0.04262 |
| FLOT2 | 4.89 | 4.37 | 0.52 | 0.04267 |
| C3orf33 | -3.12 | -1.78 | -1.34 | 0.04267 |
| ZCCHC4 | -0.02 | 0.88 | -0.91 | 0.04274 |
| TOP2B | 3.99 | 4.62 | -0.63 | 0.0427 |
| SH3GLB2 | 0.78 | 1.48 | -0.7 | 0.04271 |
| NRBP2 | -2.43 | -1.19 | -1.24 | 0.04274 |
| RN7SL334P | 1.25 | 2.25 | -1 | 0.04273 |
| STX18-AS1 | -1.54 | -0.55 | -0.99 | 0.04277 |
| EHMT2 | 1.18 | 1.87 | -0.69 | 0.04279 |
| BLOC1S4 | 1.06 | 1.89 | -0.83 | 0.04279 |
| RP11-173B14.4 | -1.76 | -0.08 | -1.68 | 0.04279 |
| SWT1 | 2.5 | 3.38 | -0.88 | 0.04282 |
| FGFR2 | -4.99 | -2.12 | -2.86 | 0.04289 |
| HCG11 | 1.25 | 1.89 | -0.64 | 0.04293 |
| SLC6A9 | -1.23 | -0.09 | -1.14 | 0.04296 |
| DGCR6L | 1.37 | 2.15 | -0.78 | 0.04293 |
| AP001189.4 | 1.97 | 3.4 | -1.42 | 0.04309 |
| PPDPF | 1.43 | 2.3 | -0.87 | 0.04312 |
| BACE2-IT1 | -0.69 | 0.45 | -1.14 | 0.04302 |
| DDX11 | -2.35 | -0.71 | -1.64 | 0.04301 |
| P2RY12 | 0.59 | 1.84 | -1.24 | 0.0431 |
| NUDT14 | -0.97 | 0.1 | -1.07 | 0.04304 |
| LILRB3 | 5.11 | 4.39 | 0.72 | 0.04301 |
| SLC35D1 | 1.79 | 2.58 | -0.79 | 0.04305 |
| C19orf24 | 0.28 | 1.16 | -0.89 | 0.04307 |
| AC008746.12 | 1.75 | 2.77 | -1.03 | 0.043 |
| TCF4 | -1.27 | -0.17 | -1.11 | 0.04304 |
| OLA1 | 0.6 | 1.32 | -0.72 | 0.0431 |
| LSP1 | 7.02 | 6.52 | 0.5 | 0.04299 |
| AMER1 | -0.72 | 0.13 | -0.85 | 0.04317 |
| AC004067.5 | 0.91 | 1.97 | -1.05 | 0.04317 |
| PVRL3 | -3.11 | -1.59 | -1.52 | 0.04319 |
| SCO1 | 1.29 | 1.95 | -0.66 | 0.0432 |
| INTS5 | 2 | 2.62 | -0.62 | 0.04329 |
| CTSO | 2.93 | 3.51 | -0.58 | 0.0433 |
| CCDC183-AS1 | -0.15 | 0.9 | -1.05 | 0.04335 |
| ZBTB41 | 1.09 | 1.84 | -0.75 | 0.04333 |
| DESI2 | 2 | 2.58 | -0.58 | 0.04339 |
| NRIP1 | 2.03 | 2.74 | -0.72 | 0.04341 |
| RAF1 | 5.13 | 4.62 | 0.51 | 0.04344 |
| AK6 | -1.16 | -0.02 | -1.14 | 0.04346 |
| CDC14B | -1.49 | -0.38 | -1.1 | 0.04347 |
| AC000123.2 | 2.88 | 3.51 | -0.63 | 0.04352 |
| MTL5 | 0.04 | -0.8 | 0.84 | 0.04363 |
| ADIRF-AS1 | -2.8 | -1.19 | -1.62 | 0.0436 |
| CTD-2124B8.2 | -0.66 | 0.44 | -1.1 | 0.04363 |
| GPALPP1 | 0.01 | 0.76 | -0.76 | 0.0436 |
| AHCY | 0.87 | 1.59 | -0.72 | 0.04362 |
| ZDHHC2 | 3.02 | 3.58 | -0.56 | 0.04356 |
| RP11-345P4.10 | 0.46 | -1.16 | 1.63 | 0.04365 |
| CALR | 4.58 | 5.31 | -0.73 | 0.0436 |
| CABIN1 | 3.02 | 3.59 | -0.58 | 0.04363 |
| RP11-423G4.10 | 2.63 | 1.96 | 0.67 | 0.04364 |
| EEF1A1P5 | 9.51 | 10.27 | -0.75 | 0.04369 |
| UBB | 5.17 | 6.08 | -0.91 | 0.04371 |
| AC008984.2 | 1.93 | 1.07 | 0.86 | 0.04375 |
| MIR762HG | -1.55 | -0.5 | -1.05 | 0.04373 |
| SNRNP40 | 1.52 | 2.17 | -0.65 | 0.04372 |
| TIPIN | -1.8 | -0.53 | -1.27 | 0.04377 |
| RP11-51J9.6 | -0.13 | 0.85 | -0.98 | 0.0438 |
| SKA2 | 0 | 0.92 | -0.92 | 0.04384 |
| RP11-104G3.2 | 1.12 | -0.09 | 1.21 | 0.04392 |
| RRP1 | -0.42 | 0.52 | -0.94 | 0.04384 |
| RP5-1021I20.1 | -3.23 | -1.73 | -1.5 | 0.04397 |
| KAT2A | 0.98 | 1.64 | -0.65 | 0.0439 |
| FAAH2 | -0.51 | 0.64 | -1.15 | 0.04392 |
| SCML2P2 | -0.03 | 0.89 | -0.92 | 0.04398 |
| RP11-709D24.8 | 0.2 | 1.17 | -0.97 | 0.04398 |
| TOE1 | 0.23 | 1.03 | -0.8 | 0.0439 |
| LACE1 | -1.66 | -0.66 | -1.01 | 0.04387 |
| RP11-457M11.7 | -2.99 | -1.35 | -1.65 | 0.04382 |
| GPR137B | 0.96 | 1.58 | -0.62 | 0.04393 |
| DOPEY1 | 1.57 | 2.32 | -0.74 | 0.04397 |
| FOXP1-IT1 | 3.28 | 2.49 | 0.79 | 0.04398 |
| HLA-DMA | 2.42 | 2.97 | -0.55 | 0.04394 |
| YBX3 | 3.3 | 4.21 | -0.9 | 0.04404 |
| CAD | 0.64 | 1.48 | -0.84 | 0.04404 |
| PPP1R3E | -0.98 | 0.14 | -1.12 | 0.04411 |
| LRRC8A | 1.68 | 2.26 | -0.58 | 0.04407 |
| ODF2L | 0.82 | 1.58 | -0.75 | 0.04413 |
| CTA-363E19.2 | 2.15 | 2.75 | -0.6 | 0.04415 |
| TBC1D24 | -2.25 | -1.1 | -1.15 | 0.04413 |
| NR1D2 | 2.02 | 3.01 | -0.99 | 0.04414 |
| SGSM3 | 0.57 | 1.28 | -0.72 | 0.04416 |
| TFDP2 | 0.53 | 1.22 | -0.69 | 0.04417 |
| RRN3P3 | 1.84 | 2.54 | -0.71 | 0.0441 |
| RPL36A-HNRNPH2 | 4.21 | 3.44 | 0.77 | 0.0441 |
| RP11-552F3.12 | -2.39 | -5.14 | 2.76 | 0.0442 |
| TNFSF4 | 0.1 | 0.99 | -0.88 | 0.0442 |
| COX6CP18 | 2.09 | 1.07 | 1.02 | 0.04421 |
| LINC01127 | 2.84 | 1.42 | 1.42 | 0.04429 |
| TBP | 0.77 | 1.43 | -0.66 | 0.04431 |
| MCF2L2 | -2.77 | -1.44 | -1.34 | 0.04428 |
| RP11-10C24.3 | 0.13 | -1.38 | 1.51 | 0.04428 |
| ARMCX7P | 0.97 | 1.72 | -0.75 | 0.04432 |
| NUDCD3 | 1.36 | 2.03 | -0.67 | 0.0443 |
| SLC2A8 | -3.1 | -1.58 | -1.53 | 0.04437 |
| RPLP1 | 4.84 | 5.41 | -0.57 | 0.04439 |
| MCM3AP-AS1 | -1.47 | -0.51 | -0.96 | 0.04436 |
| MRPS25 | 1.26 | 2 | -0.74 | 0.04435 |
| ZNF529 | -0.15 | 0.63 | -0.78 | 0.04445 |
| CRIP1 | 1.16 | 1.84 | -0.68 | 0.04445 |
| ATAD5 | -0.01 | 0.75 | -0.76 | 0.04444 |
| DGCR11 | 3.63 | 3.09 | 0.54 | 0.0445 |
| RP4-635A23.6 | 3.05 | 2.53 | 0.52 | 0.0445 |
| LRMP | 3.89 | 3.38 | 0.51 | 0.04462 |
| MBOAT7 | 4.9 | 4.22 | 0.68 | 0.04465 |
| TRIM16 | -2.16 | -1.07 | -1.09 | 0.04468 |
| NSMCE3 | 2.52 | 3.26 | -0.73 | 0.0446 |
| KIAA0125 | 0.1 | 0.87 | -0.77 | 0.04464 |
| CHD7 | 2.23 | 1.69 | 0.54 | 0.04464 |
| NLGN2 | -3.42 | -1.48 | -1.94 | 0.04461 |
| RP11-9E17.1 | -1.59 | -0.32 | -1.28 | 0.04467 |
| RP3-461F17.3 | 0.13 | 1.09 | -0.95 | 0.04466 |
| AC007036.5 | -0.49 | 0.7 | -1.19 | 0.04449 |
| TNFSF8 | 3.95 | 3.24 | 0.71 | 0.04466 |
| CATSPERB | -3.12 | -1.54 | -1.58 | 0.04456 |
| CCT6A | 2.12 | 2.78 | -0.66 | 0.04452 |
| LINC00570 | -1.09 | 0.22 | -1.31 | 0.04464 |
| NOV | 2.87 | 1.94 | 0.93 | 0.04457 |
| SLC7A6 | 1.12 | 2.09 | -0.98 | 0.04459 |
| TMEM201 | -1.94 | -0.8 | -1.14 | 0.04456 |
| FGD3 | 5.92 | 5.4 | 0.52 | 0.04459 |
| CDH26 | -0.03 | -0.85 | 0.83 | 0.04482 |
| TRIM73 | -2.37 | -0.96 | -1.41 | 0.04476 |
| CTD-3065J16.9 | -0.46 | -1.96 | 1.51 | 0.04478 |
| JUP | -0.16 | 1.07 | -1.23 | 0.0448 |
| POU2AF1 | 0.81 | 1.64 | -0.83 | 0.04483 |
| RP13-941N14.1 | 1.13 | 2.24 | -1.11 | 0.04482 |
| GOLM1 | 0.62 | 1.28 | -0.66 | 0.04482 |
| MSI2 | 1.47 | 2.1 | -0.63 | 0.04485 |
| AP001062.7 | -0.51 | 0.27 | -0.79 | 0.04483 |
| ADRBK2 | 2.55 | 3.15 | -0.59 | 0.04479 |
| TRAF4 | -1.9 | -0.8 | -1.1 | 0.04484 |
| SIGLEC6 | -2.7 | -1.04 | -1.65 | 0.04488 |
| NELFA | -0.07 | 0.72 | -0.79 | 0.04493 |
| EXOSC7 | -0.05 | 0.74 | -0.8 | 0.04491 |
| SLC9B2 | -1.21 | -0.19 | -1.02 | 0.04506 |
| PLEKHM1P1 | 4.61 | 4.08 | 0.53 | 0.04507 |
| MTCO3P11 | 3.63 | 2.88 | 0.76 | 0.04508 |
| RP11-89K10.1 | -1.13 | 0.09 | -1.23 | 0.04513 |
| BPHL | -2.36 | -1.08 | -1.28 | 0.04511 |
| AKT3 | 1.46 | 2.24 | -0.78 | 0.04503 |
| CANX | 4.2 | 4.81 | -0.62 | 0.04506 |
| PHF24 | -1.04 | -2.77 | 1.73 | 0.0451 |
| ANKS6 | -2.05 | -1 | -1.05 | 0.04519 |
| AC019097.7 | 0.16 | 1.11 | -0.95 | 0.04528 |
| ATR | 1.92 | 2.68 | -0.76 | 0.04534 |
| SIMC1 | -0.44 | 0.43 | -0.87 | 0.04536 |
| RP11-545P7.9 | -0.89 | 0.88 | -1.77 | 0.04535 |
| RP1-7G5.5 | 0.74 | 1.44 | -0.7 | 0.04539 |
| MRPL49 | 0.19 | 0.91 | -0.72 | 0.04552 |
| BLNK | 0.67 | 1.63 | -0.96 | 0.04556 |
| NAGA | 2.53 | 3.26 | -0.73 | 0.04555 |
| TMEM63B | 3.01 | 3.77 | -0.76 | 0.0455 |
| SLC26A2 | 1.27 | 2.01 | -0.74 | 0.04559 |
| RAB33A | 0.07 | 1.31 | -1.23 | 0.04556 |
| PSMD11 | 1.57 | 2.19 | -0.62 | 0.04546 |
| RP11-229P13.19 | -0.52 | 1 | -1.52 | 0.04555 |
| RP11-700J17.1 | -0.89 | 0.43 | -1.33 | 0.04554 |
| STX10 | 2.94 | 2.31 | 0.62 | 0.04552 |
| IFRD2 | -1.2 | -0.3 | -0.89 | 0.04545 |
| AGAP3 | -0.52 | 0.26 | -0.78 | 0.04553 |
| AGBL5 | -0.47 | 0.34 | -0.81 | 0.04564 |
| NLRX1 | 1.49 | 0.71 | 0.77 | 0.04569 |
| TRMT6 | 0.17 | 1.05 | -0.88 | 0.0457 |
| GPSM2 | 1.1 | 0.4 | 0.71 | 0.04575 |
| RP13-131K19.7 | -0.55 | 0.71 | -1.25 | 0.04579 |
| AP001469.9 | -2.02 | -0.83 | -1.19 | 0.04579 |
| PGAP1 | -2.2 | -0.96 | -1.25 | 0.04582 |
| FKBP2 | 0.26 | 1.11 | -0.85 | 0.04584 |
| KLRB1 | 3.4 | 4.65 | -1.25 | 0.04585 |
| IMMT | 1.67 | 2.32 | -0.65 | 0.04587 |
| GABPB2 | 1.19 | 1.89 | -0.7 | 0.04587 |
| RAB33B | 3.8 | 3.3 | 0.5 | 0.04593 |
| DENND5A | 4.6 | 4.07 | 0.53 | 0.04618 |
| HNRNPR | 2.24 | 2.99 | -0.74 | 0.04596 |
| CTDSPL2 | 1.46 | 2.16 | -0.7 | 0.04597 |
| LPCAT4 | 0.77 | 1.44 | -0.67 | 0.04609 |
| NIN | 4.93 | 4.39 | 0.54 | 0.04601 |
| BLOC1S6 | 0.77 | 1.86 | -1.09 | 0.046 |
| FANCB | 0.03 | 0.89 | -0.86 | 0.046 |
| USP44 | -2.59 | -1.26 | -1.33 | 0.0461 |
| ZNF451 | 2.2 | 2.8 | -0.59 | 0.04619 |
| RP11-1193F23.1 | -0.96 | -2.26 | 1.3 | 0.04621 |
| TACO1 | 0.47 | 1.24 | -0.77 | 0.04605 |
| SUMO3 | 2.41 | 3.02 | -0.61 | 0.04618 |
| PPIA | 2.65 | 3.3 | -0.65 | 0.04609 |
| METAP2 | 0.6 | 1.31 | -0.71 | 0.0461 |
| VDAC2P2 | 1.68 | 2.9 | -1.22 | 0.0462 |
| ITM2A | 0.93 | 2.01 | -1.08 | 0.04604 |
| RIPK3 | 2.85 | 2.3 | 0.54 | 0.04606 |
| STARD9 | -0.91 | 0.3 | -1.21 | 0.04608 |
| RP11-63I8.1 | -1.54 | -0.28 | -1.26 | 0.04615 |
| RUVBL1 | 0.22 | 1.06 | -0.84 | 0.04619 |
| FBXO4 | -0.86 | 0.13 | -0.99 | 0.0461 |
| RPS2P5 | 6.89 | 7.51 | -0.62 | 0.04618 |
| ADAT3 | -1.1 | 0.1 | -1.2 | 0.04625 |
| DESI1 | 2.08 | 2.62 | -0.54 | 0.04631 |
| CACNA1E | -0.23 | -1.34 | 1.12 | 0.04634 |
| ATMIN | 0.95 | 1.61 | -0.65 | 0.04637 |
| WHAMMP2 | 0.02 | 0.78 | -0.76 | 0.04638 |
| C12orf57 | 0.63 | 1.59 | -0.96 | 0.04647 |
| ANKS3 | -1.44 | -0.51 | -0.94 | 0.04647 |
| RXRA | 5.04 | 4.54 | 0.51 | 0.04644 |
| RP11-936I5.1 | -1.72 | -0.39 | -1.33 | 0.04646 |
| VDAC1P1 | 0.84 | 1.77 | -0.92 | 0.04652 |
| RN7SL145P | 0.67 | 1.4 | -0.73 | 0.04652 |
| RIC3 | -1.63 | -0.5 | -1.13 | 0.0466 |
| SNHG8 | 0.55 | 1.46 | -0.91 | 0.04661 |
| DFFB | -0.71 | 0.21 | -0.92 | 0.04659 |
| HOXB3 | -2.71 | -1.55 | -1.16 | 0.04663 |
| MED19 | -0.37 | 0.42 | -0.8 | 0.04667 |
| RP11-299A16.1 | 2.69 | 1.88 | 0.81 | 0.04664 |
| ZSCAN21 | -0.69 | 0.32 | -1 | 0.04672 |
| RP1-153P14.5 | 0.63 | 1.44 | -0.81 | 0.04673 |
| HAUS5 | -1.48 | -0.2 | -1.28 | 0.04672 |
| EEF1A1P6 | 6.29 | 7.01 | -0.72 | 0.04671 |
| LRIG2 | 1.23 | 1.95 | -0.72 | 0.04683 |
| DDOST | 3.1 | 3.63 | -0.53 | 0.04681 |
| ARL4D | -2.43 | -1.01 | -1.42 | 0.04684 |
| SHQ1 | 0.09 | 0.95 | -0.85 | 0.0468 |
| MESDC2 | 1.2 | 1.91 | -0.7 | 0.04684 |
| CPED1 | -1.31 | -0.01 | -1.3 | 0.04676 |
| TCF12 | 0.32 | 1.24 | -0.92 | 0.04684 |
| MAP3K9 | -1.88 | -0.72 | -1.16 | 0.04694 |
| EIF1B | 3.9 | 4.48 | -0.58 | 0.04689 |
| SSR4 | 1.1 | 1.79 | -0.7 | 0.04697 |
| RP1-193H18.2 | 2.9 | 2.06 | 0.85 | 0.04692 |
| AC093642.5 | 1.53 | 2.19 | -0.66 | 0.04689 |
| DFNB59 | -3.53 | -1.89 | -1.63 | 0.0469 |
| ZNF746 | 4.19 | 3.65 | 0.53 | 0.04691 |
| IGLV6-57 | -0.23 | 1.05 | -1.28 | 0.047 |
| RP11-556I13.2 | 2.65 | 1.41 | 1.24 | 0.04713 |
| KLHDC7B | -0.07 | 0.77 | -0.84 | 0.04714 |
| CTC-523E23.3 | 0.66 | 1.67 | -1.01 | 0.04714 |
| DCLRE1A | -0.36 | 0.7 | -1.07 | 0.04713 |
| VSIG1 | -0.78 | 0.29 | -1.07 | 0.04714 |
| LMLN | -2.61 | -1.37 | -1.23 | 0.04721 |
| CXCR2 | 8.03 | 7.36 | 0.67 | 0.04722 |
| SGMS2 | 1.86 | 1.08 | 0.78 | 0.04719 |
| AC007386.3 | -0.9 | 0.51 | -1.41 | 0.04716 |
| ICAM4 | -2.43 | -1 | -1.44 | 0.04725 |
| CNKSR2 | -1.55 | -0.56 | -0.99 | 0.04723 |
| RP11-109N23.1 | 0.43 | -0.7 | 1.12 | 0.0472 |
| BACH1-IT2 | 1.39 | 0.73 | 0.66 | 0.04734 |
| ARF6 | 5.23 | 5.78 | -0.55 | 0.04728 |
| RP11-514F3.5 | 0.71 | 1.63 | -0.92 | 0.04733 |
| PHC1P1 | -0.14 | 0.76 | -0.9 | 0.04734 |
| POLH | 0.88 | 1.66 | -0.78 | 0.04726 |
| DAZAP2P1 | -0.02 | 1.05 | -1.07 | 0.0474 |
| WDR34 | -1.69 | -0.67 | -1.03 | 0.04743 |
| PTPRK | -2.02 | -0.73 | -1.29 | 0.04766 |
| TMEM252 | 2.03 | 1.25 | 0.78 | 0.04765 |
| INPP5E | 0.66 | 1.42 | -0.76 | 0.04751 |
| LIG3 | 0.66 | 1.42 | -0.75 | 0.04757 |
| ADAMTS17 | -2.33 | -1.2 | -1.13 | 0.0476 |
| GCFC2 | -0.22 | 0.62 | -0.84 | 0.04755 |
| KRTAP5-AS1 | -2.76 | -1.15 | -1.61 | 0.04768 |
| ZNF490 | 1.4 | 2.23 | -0.83 | 0.04756 |
| ANK1 | 2.02 | 3.08 | -1.07 | 0.04766 |
| ECI2 | 0.13 | 1.03 | -0.9 | 0.04762 |
| RP11-572M11.4 | -2.41 | -1.17 | -1.24 | 0.04758 |
| APOBEC3B | 2.75 | 1.49 | 1.26 | 0.0476 |
| ZKSCAN8 | 2.38 | 3.04 | -0.66 | 0.04764 |
| IGSF6 | 6.09 | 5.54 | 0.54 | 0.04749 |
| SAMD10 | -1.35 | -0.03 | -1.32 | 0.04764 |
| TNFAIP6 | 4.73 | 3.27 | 1.46 | 0.04771 |
| CARD17 | 2.09 | 0.8 | 1.29 | 0.04781 |
| CCDC6 | 2.08 | 2.67 | -0.59 | 0.04775 |
| CCDC15 | -0.14 | 0.74 | -0.88 | 0.04784 |
| NPAT | 2.89 | 3.5 | -0.61 | 0.0478 |
| ANKRD36B | 1.31 | 2.43 | -1.12 | 0.04774 |
| KPNA6 | 2.91 | 3.57 | -0.66 | 0.04779 |
| TRAV8-1 | -0.6 | 1.27 | -1.88 | 0.04784 |
| CBLN3 | -2.87 | -0.78 | -2.09 | 0.04777 |
| RN7SKP203 | 10.15 | 9.05 | 1.11 | 0.04782 |
| RP11-250B2.6 | -1.21 | 0.41 | -1.62 | 0.04782 |
| LINC01001 | 1.33 | 0.34 | 1 | 0.0479 |
| Z84812.4 | 1.78 | 0.89 | 0.89 | 0.04801 |
| ZCCHC14 | 0.59 | 1.29 | -0.7 | 0.04794 |
| MAST3 | 5.75 | 5.17 | 0.58 | 0.04791 |
| ZNF350 | 3.15 | 2.59 | 0.55 | 0.04793 |
| TMEM50B | 0.81 | 1.46 | -0.65 | 0.04801 |
| FLNB | 1.1 | 2.05 | -0.95 | 0.04801 |
| IMP3 | 1.24 | 2.03 | -0.79 | 0.04798 |
| RP11-480A16.1 | 0.14 | 1.07 | -0.93 | 0.048 |
| BZRAP1-AS1 | 1.38 | 1.96 | -0.58 | 0.04795 |
| RP11-3K24.1 | 4.09 | 3.53 | 0.56 | 0.04798 |
| DNAJC21 | 0.96 | 1.66 | -0.7 | 0.04793 |
| GPA33 | 0.35 | 1.2 | -0.84 | 0.04803 |
| MMS19 | 1.4 | 2.07 | -0.67 | 0.04803 |
| IQCB1 | 1.46 | 2.21 | -0.74 | 0.04805 |
| KB-1958F4.1 | 3.19 | 2.24 | 0.95 | 0.04809 |
| DYNLL2 | 2.89 | 3.41 | -0.52 | 0.04809 |
| VIL1 | -1.8 | -0.55 | -1.25 | 0.0481 |
| RP4-673D20.4 | 0.82 | -0.6 | 1.43 | 0.04812 |
| SLFN12L | 2.84 | 3.7 | -0.86 | 0.04819 |
| NQO1 | -3.79 | -2.04 | -1.75 | 0.04821 |
| CLNS1A | 1.73 | 2.36 | -0.63 | 0.04828 |
| CPOX | 0.92 | 1.64 | -0.72 | 0.04825 |
| ADH5 | 1.04 | 1.76 | -0.72 | 0.04823 |
| GOLPH3L | 2.25 | 2.77 | -0.52 | 0.04825 |
| PSMD5-AS1 | 1.05 | -0.44 | 1.48 | 0.04838 |
| HELZ2 | 3.76 | 3.07 | 0.69 | 0.04834 |
| WDR82P1 | -2.45 | -1.13 | -1.33 | 0.04836 |
| RBM14 | 1.83 | 2.46 | -0.63 | 0.04831 |
| MYO1F | 6.56 | 6.03 | 0.53 | 0.04833 |
| SORBS3 | -1.36 | -0.2 | -1.16 | 0.0483 |
| RP11-723D22.2 | 2.67 | 2.11 | 0.56 | 0.04837 |
| CUL7 | 0.84 | 1.43 | -0.59 | 0.04844 |
| RP11-130F10.1 | -1.93 | -0.8 | -1.13 | 0.04842 |
| RP11-830F9.6 | -1.05 | -0.04 | -1.01 | 0.04846 |
| MICA | 1.47 | 2.45 | -0.98 | 0.0484 |
| RP11-61L23.2 | -1.61 | -0.46 | -1.15 | 0.04843 |
| PLPP3 | -1.9 | -3.22 | 1.33 | 0.04854 |
| APOBEC3F | 1.73 | 2.32 | -0.59 | 0.04855 |
| SCAF4 | 2.13 | 2.71 | -0.57 | 0.04853 |
| GOT1 | 0.19 | 1.05 | -0.86 | 0.04855 |
| RP11-618N24.1 | -1.84 | -0.09 | -1.75 | 0.04849 |
| ALDH4A1 | -1.79 | -0.76 | -1.03 | 0.04855 |
| WDYHV1 | -1.63 | -0.54 | -1.09 | 0.04861 |
| PPM1G | 2.5 | 3.02 | -0.52 | 0.04866 |
| CLUH | 0.1 | 0.98 | -0.89 | 0.0487 |
| PINX1 | -0.25 | 0.53 | -0.78 | 0.0487 |
| CUL1 | 2.55 | 3.27 | -0.72 | 0.04872 |
| LPIN1 | 0.81 | 1.58 | -0.76 | 0.04868 |
| LRRC23 | -2.69 | -1.52 | -1.17 | 0.04876 |
| RP1-101A2.1 | 1.8 | 2.44 | -0.64 | 0.0488 |
| RP11-213G2.3 | 1.03 | 1.69 | -0.66 | 0.04884 |
| RP11-359B12.2 | -3.17 | -1.6 | -1.57 | 0.04883 |
| RP11-467L13.5 | 0.1 | -1.37 | 1.47 | 0.04898 |
| ARL2BP | 1.87 | 2.73 | -0.86 | 0.04898 |
| ZNF542P | -2.19 | -0.95 | -1.24 | 0.0489 |
| DOCK7 | -1.39 | -0.28 | -1.11 | 0.04893 |
| CTSC | 3.1 | 3.68 | -0.58 | 0.04895 |
| CHCHD10 | -1.34 | -0.35 | -0.99 | 0.04895 |
| ZC2HC1A | -0.54 | 0.56 | -1.1 | 0.04898 |
| GGTA1P | -1.35 | -0.26 | -1.09 | 0.04901 |
| RNF126 | 1.15 | 1.89 | -0.73 | 0.0491 |
| RP11-573E11.2 | 0.44 | -0.86 | 1.3 | 0.0491 |
| DHX35 | 0.03 | 0.82 | -0.8 | 0.04916 |
| CLEC12B | 1.25 | -0.31 | 1.56 | 0.04918 |
| RNF24 | 5.22 | 4.48 | 0.74 | 0.0492 |
| CTD-2036P10.5 | -1.73 | -0.34 | -1.39 | 0.04925 |
| TMEM9B | 2.27 | 2.84 | -0.57 | 0.04925 |
| RP11-438L19.1 | -1.69 | -0.73 | -0.96 | 0.04925 |
| MAF1 | 3.61 | 4.15 | -0.54 | 0.04932 |
| ABLIM3 | -1.74 | -0.26 | -1.48 | 0.04935 |
| PAIP1 | 0.27 | 1.03 | -0.76 | 0.04932 |
| ATP6V0A1 | 2.39 | 1.88 | 0.51 | 0.04927 |
| TBL3 | -0.53 | 0.44 | -0.97 | 0.04929 |
| NME2 | 1.44 | 2.1 | -0.66 | 0.04932 |
| SLC25A12 | 0.37 | 1.21 | -0.84 | 0.04931 |
| SIAE | -1.2 | -0.24 | -0.96 | 0.0493 |
| FRG1CP | 2.4 | 3.18 | -0.78 | 0.04941 |
| EEF1DP3 | -1.56 | -0.17 | -1.39 | 0.04945 |
| ARMCX5-GPRASP2 | -2.48 | -0.86 | -1.62 | 0.04943 |
| LINC00865 | -3.35 | -1.28 | -2.07 | 0.04948 |
| AC009245.3 | 2.85 | 3.59 | -0.74 | 0.04956 |
| HIST2H2BC | 3.37 | 2.52 | 0.85 | 0.04954 |
| VPS50 | 0.77 | 1.46 | -0.69 | 0.04955 |
| NDRG2 | -3.23 | -1.89 | -1.34 | 0.04956 |
| SPAST | 2.27 | 1.74 | 0.53 | 0.04953 |
| CMKLR1 | 0.62 | 1.49 | -0.87 | 0.04965 |
| CCDC18 | 0.43 | 1.11 | -0.68 | 0.04966 |
| TNFSF10 | 6 | 5.29 | 0.71 | 0.04963 |
| RP11-734B5.2 | -0.91 | 0.64 | -1.55 | 0.04961 |
| CACNA1D | -1.26 | -2.41 | 1.15 | 0.04968 |
| RP11-1046B16.3 | 4.48 | 3.93 | 0.54 | 0.04968 |
| RP11-15H20.6 | 0.5 | 1.22 | -0.72 | 0.04968 |
| HEG1 | 0.83 | 1.63 | -0.8 | 0.04959 |
| RP11-197N18.8 | -1.08 | 0.09 | -1.17 | 0.04974 |
| JMJD8 | -0.82 | 0.1 | -0.91 | 0.04974 |
| LINC01259 | 0.34 | 1.21 | -0.87 | 0.04974 |
| LIN9 | -1.13 | -0.1 | -1.02 | 0.04978 |
| CCR4 | 1.95 | 3 | -1.04 | 0.04981 |
| SPRY3 | 1.03 | 0.26 | 0.77 | 0.04992 |
| ENPP4 | 2.08 | 2.99 | -0.91 | 0.04988 |
| MPP6 | -0.24 | 0.76 | -1.01 | 0.04986 |
| CMSS1 | -1.29 | -0.05 | -1.24 | 0.04996 |
| SIK2 | 1.2 | 1.85 | -0.64 | 0.04991 |
| RHEBP1 | 1.87 | 2.6 | -0.73 | 0.04984 |
| KIAA1328 | -0.9 | -0.01 | -0.89 | 0.04994 |
| KIR3DL1 | 0.87 | -0.11 | 0.98 | 0.04992 |
| RP11-77P16.4 | -1.53 | -0.59 | -0.95 | 0.04994 |
| AP001962.3 | 3.09 | 2.45 | 0.64 | 0.04992 |
| NMD3 | 1.24 | 1.93 | -0.69 | 0.04997 |

**Supplementary Table 3 |**Expression data of hub genes in AMI patients

| Group | DYSF | TCN1 | LRG1 | CSF3R | RNASE2 | AQP9 | TNFAIP6 | sample |
| --- | --- | --- | --- | --- | --- | --- | --- | --- |
| control | 5.331844 | 2.690851 | 4.65337 | 6.398238 | 3.374173 | 6.000225 | 4.176375 | sample1 |
| control | 4.603492 | 2.349079 | 3.787843 | 5.798665 | 4.650562 | 5.564746 | 3.162171 | sample2 |
| control | 5.224363 | 2.088607 | 4.124735 | 5.768746 | 3.441213 | 5.842663 | 4.529393 | sample3 |
| control | 5.023988 | 2.067043 | 4.237163 | 6.002425 | 3.800391 | 5.113485 | 4.428797 | sample4 |
| control | 5.29109 | 2.696428 | 4.348217 | 6.134769 | 3.944981 | 5.810996 | 4.545025 | sample5 |
| control | 4.905829 | 2.096296 | 3.788314 | 5.738496 | 3.757408 | 5.413199 | 3.769104 | sample6 |
| control | 5.145755 | 2.322114 | 4.516405 | 6.01464 | 3.117239 | 5.826513 | 3.574931 | sample7 |
| control | 5.03862 | 2.690457 | 4.415861 | 6.180003 | 3.23234 | 5.572597 | 3.311739 | sample8 |
| control | 5.237463 | 2.243394 | 4.406597 | 6.123699 | 2.960292 | 6.093808 | 4.227097 | sample9 |
| control | 4.697233 | 2.828823 | 3.695941 | 5.736497 | 3.378989 | 5.506313 | 3.553564 | sample10 |
| AMI | 5.655776 | 3.862895 | 4.924574 | 6.990438 | 4.579141 | 6.905509 | 5.259324 | sample11 |
| AMI | 5.853187 | 3.397387 | 4.788777 | 6.405654 | 4.376372 | 6.002143 | 5.43725 | sample12 |
| AMI | 5.940182 | 2.84589 | 5.313917 | 6.723121 | 4.958553 | 6.922945 | 4.418492 | sample13 |
| AMI | 5.937005 | 2.825727 | 5.291843 | 7.099841 | 4.192048 | 6.233247 | 4.854515 | sample14 |
| AMI | 5.957135 | 4.265883 | 5.134263 | 6.633424 | 4.876875 | 5.989792 | 4.813742 | sample15 |
| AMI | 6.133849 | 2.890205 | 4.746719 | 6.592319 | 4.37191 | 6.943051 | 4.508679 | sample16 |
| AMI | 5.684095 | 2.955682 | 4.578252 | 6.604189 | 4.377252 | 6.915113 | 4.299087 | sample17 |
| AMI | 5.789146 | 2.709096 | 5.264711 | 6.075797 | 4.826949 | 6.35369 | 4.379629 | sample18 |
| AMI | 5.63746 | 2.904943 | 5.387573 | 6.308008 | 3.86347 | 6.378046 | 4.503951 | sample19 |
| AMI | 5.977158 | 3.439026 | 5.202965 | 6.838192 | 4.87436 | 6.792962 | 5.201268 | sample20 |
| Group | DYSF | TCN1 | LRG1 | CSF3R | RNASE2 | AQP9 | TNFAIP6 | sample |
| control | 5.331844 | 2.690851 | 4.65337 | 6.398238 | 3.374173 | 6.000225 | 4.176375 | sample1 |
| control | 4.603492 | 2.349079 | 3.787843 | 5.798665 | 4.650562 | 5.564746 | 3.162171 | sample2 |
| control | 5.224363 | 2.088607 | 4.124735 | 5.768746 | 3.441213 | 5.842663 | 4.529393 | sample3 |
| control | 5.023988 | 2.067043 | 4.237163 | 6.002425 | 3.800391 | 5.113485 | 4.428797 | sample4 |
| control | 5.29109 | 2.696428 | 4.348217 | 6.134769 | 3.944981 | 5.810996 | 4.545025 | sample5 |
| control | 4.905829 | 2.096296 | 3.788314 | 5.738496 | 3.757408 | 5.413199 | 3.769104 | sample6 |
| control | 5.145755 | 2.322114 | 4.516405 | 6.01464 | 3.117239 | 5.826513 | 3.574931 | sample7 |
| control | 5.03862 | 2.690457 | 4.415861 | 6.180003 | 3.23234 | 5.572597 | 3.311739 | sample8 |
| control | 5.237463 | 2.243394 | 4.406597 | 6.123699 | 2.960292 | 6.093808 | 4.227097 | sample9 |
| control | 4.697233 | 2.828823 | 3.695941 | 5.736497 | 3.378989 | 5.506313 | 3.553564 | sample10 |
| AMI | 5.655776 | 3.862895 | 4.924574 | 6.990438 | 4.579141 | 6.905509 | 5.259324 | sample11 |
| AMI | 5.853187 | 3.397387 | 4.788777 | 6.405654 | 4.376372 | 6.002143 | 5.43725 | sample12 |
| AMI | 5.940182 | 2.84589 | 5.313917 | 6.723121 | 4.958553 | 6.922945 | 4.418492 | sample13 |
| AMI | 5.937005 | 2.825727 | 5.291843 | 7.099841 | 4.192048 | 6.233247 | 4.854515 | sample14 |
| AMI | 5.957135 | 4.265883 | 5.134263 | 6.633424 | 4.876875 | 5.989792 | 4.813742 | sample15 |
| AMI | 6.133849 | 2.890205 | 4.746719 | 6.592319 | 4.37191 | 6.943051 | 4.508679 | sample16 |
| AMI | 5.684095 | 2.955682 | 4.578252 | 6.604189 | 4.377252 | 6.915113 | 4.299087 | sample17 |
| AMI | 5.789146 | 2.709096 | 5.264711 | 6.075797 | 4.826949 | 6.35369 | 4.379629 | sample18 |
| AMI | 5.63746 | 2.904943 | 5.387573 | 6.308008 | 3.86347 | 6.378046 | 4.503951 | sample19 |
| AMI | 5.977158 | 3.439026 | 5.202965 | 6.838192 | 4.87436 | 6.792962 | 5.201268 | sample20 |
|  |  |  |  |  |  |  |  |  |
| Group | IL1RN | BCL6 | CCR1 | FFAR2 | ASGR2 | CYP27A1 | sample |  |
| control | 3.394316 | 4.93142 | 5.753013 | 5.264319 | 1.912836 | 2.662927 | sample1 |  |
| control | 3.093615 | 4.590587 | 5.246737 | 4.663607 | 2.206348 | 2.771647 | sample2 |  |
| control | 3.422789 | 4.806261 | 5.602747 | 5.049425 | 2.326481 | 3.0245 | sample3 |  |
| control | 3.67861 | 5.274481 | 5.238181 | 5.049477 | 2.349499 | 2.930641 | sample4 |  |
| control | 3.758244 | 4.978401 | 6.014122 | 5.443756 | 2.302591 | 3.388795 | sample5 |  |
| control | 3.346764 | 4.571786 | 5.674433 | 4.962462 | 2.280306 | 3.426787 | sample6 |  |
| control | 3.212275 | 4.714714 | 5.34416 | 4.747037 | 1.902791 | 2.86978 | sample7 |  |
| control | 2.94381 | 4.905145 | 5.575921 | 4.696983 | 2.0971 | 3.470168 | sample8 |  |
| control | 3.223135 | 5.049986 | 5.339865 | 5.07754 | 2.126307 | 2.984407 | sample9 |  |
| control | 3.859602 | 4.491847 | 5.533178 | 4.82767 | 1.963246 | 3.015795 | sample10 |  |
| AMI | 3.644373 | 4.999637 | 4.939741 | 4.509076 | 2.786952 | 3.4248 | sample11 |  |
| AMI | 3.477261 | 5.740519 | 4.949557 | 5.172385 | 2.584861 | 3.137926 | sample12 |  |
| AMI | 3.249758 | 5.458289 | 5.396762 | 4.99314 | 2.388618 | 3.403385 | sample13 |  |
| AMI | 2.99042 | 4.94964 | 5.553309 | 4.635072 | 2.49022 | 2.982572 | sample14 |  |
| AMI | 2.644158 | 5.231817 | 5.053896 | 4.161618 | 1.902724 | 2.338335 | sample15 |  |
| AMI | 3.622693 | 5.384283 | 5.124652 | 5.209666 | 2.129016 | 3.453525 | sample16 |  |
| AMI | 3.211136 | 5.639672 | 5.41031 | 5.093083 | 2.216373 | 2.942286 | sample17 |  |
| AMI | 3.348852 | 5.400722 | 5.427234 | 5.048933 | 2.467316 | 3.590068 | sample18 |  |
| AMI | 3.353462 | 5.422367 | 5.261618 | 4.98593 | 2.137613 | 3.030043 | sample19 |  |
| AMI | 3.482212 | 4.988251 | 4.792784 | 4.384944 | 2.311892 | 3.058694 | sample20 |  |

**Supplementary Table 4** **|**Correlation of immune cells and DYSF in GSE62646 Correlation of immune cells and LRG1 in GSE62646

| Gene | Cell | Correlation (r) | P Value |
| --- | --- | --- | --- |
| LRG1 | Monocytes | 0.578657 | 1.18E-06 |
| LRG1 | Neutrophils | 0.532945 | 2.31E-05 |
| LRG1 | Dendritic cells activated | 0.466288 | 0.000811 |
| LRG1 | T cells CD8 | -0.18958 | 0.018148 |
| LRG1 | Macrophages M2 | -0.23931 | 0.002709 |
| LRG1 | NK cells resting | -0.25384 | 0.001437 |
| LRG1 | T cells CD4 naive | -0.26798 | 0.000748 |

Correlation of immune cells and CSF3R in GSE62646

| Gene | Cell | Correlation (r) | P Value |
| --- | --- | --- | --- |
| CSF3R | Neutrophils | 0.672392 | 5.44E-10 |
| CSF3R | Monocytes | 0.621224 | 3.57E-12 |
| CSF3R | T cells regulatory (Tregs) | 0.414239 | 6.84E-05 |
| CSF3R | T cells CD4 memory activated | 0.261147 | 0.00103 |
| CSF3R | Mast cells resting | 0.236932 | 0.002995 |
| CSF3R | T cells CD4 naive | -0.23213 | 0.003656 |
| CSF3R | Macrophages M2 | -0.2515 | 0.001595 |
| CSF3R | T cells CD8 | -0.2663 | 0.00081 |
| CSF3R | T cells CD4 memory resting | -0.31995 | 4.94E-05 |
| CSF3R | NK cells resting | -0.34502 | 1.10E-05 |
| CSF3R | Eosinophils | -0.36751 | 2.55E-06 |

Correlation of immune cells and DYSF in GSE81622

| Gene | Cell | Correlation (r) | P Value |
| --- | --- | --- | --- |
| DYSF | Monocytes | 0.68411 | 8.52E-09 |
| DYSF | Neutrophils | 0.533077 | 0.012961 |
| DYSF | Macrophages M0 | 0.449465 | 0.000577 |
| DYSF | T cells regulatory (Tregs) | 0.392601 | 0.003029 |
| DYSF | Macrophages M2 | 0.37353 | 0.00497 |
| DYSF | Dendritic cells activated | 0.340699 | 0.010918 |
| DYSF | B cells naive | 0.284451 | 0.03531 |
| DYSF | Mast cells resting | -0.28413 | 0.035524 |
| DYSF | T cells CD4 memory resting | -0.35258 | 0.008288 |
| DYSF | Eosinophils | -0.37678 | 0.004576 |
| DYSF | NK cells resting | -0.41144 | 0.001804 |
| DYSF | T cells gamma delta | -0.46685 | 0.000327 |
| DYSF | T cells CD4 memory activated | -0.63427 | 2.00E-07 |

Correlation of immune cells and LRG1 in GSE81622

| gene_name1 | gene_name2 | Correlation (r) | P Value |
| --- | --- | --- | --- |
| LRG1 | Neutrophils | 0.578046 | 0.000223 |
| LRG1 | Monocytes | 0.5441 | 1.76E-05 |
| LRG1 | Macrophages M0 | 0.489343 | 0.00015 |
| LRG1 | Macrophages M2 | 0.403351 | 0.002262 |
| LRG1 | T cells regulatory (Tregs) | 0.383631 | 0.003837 |
| LRG1 | Dendritic cells activated | 0.292781 | 0.030065 |
| LRG1 | NK cells activated | 0.273216 | 0.043564 |
| LRG1 | T cells CD4 memory activated | -0.38047 | 0.004165 |
| LRG1 | NK cells resting | -0.44422 | 0.00068 |
| LRG1 | T cells CD4 memory resting | -0.46838 | 0.000311 |

Correlation of immune cells and CSF3R in GSE81622

| Gene | Cell | Correlation (r) | P Value |
| --- | --- | --- | --- |
| CSF3R | Monocytes | 0.549845 | 0.00057 |
| CSF3R | Neutrophils | 0.518696 | 0.001949 |
| CSF3R | Macrophages M2 | 0.381077 | 0.03764 |
| CSF3R | Mast cells resting | -0.2703 | 0.045951 |
| CSF3R | Eosinophils | -0.30957 | 0.021452 |
| CSF3R | T cells gamma delta | -0.37712 | 0.004537 |
| CSF3R | T cells CD4 memory activated | -0.5437 | 1.79E-05 |
